# Supplementary material for: The developing mouse coronal suture at single-cell resolution
Source: Research Square preprint supplement (doi:10.21203/rs.3.rs-135455/v1), 2021-04-09
Supplement: Supplementary file 1 [file 172f48da6fda8da321276336.pdf]

## Supplementary Figure 1

**a**

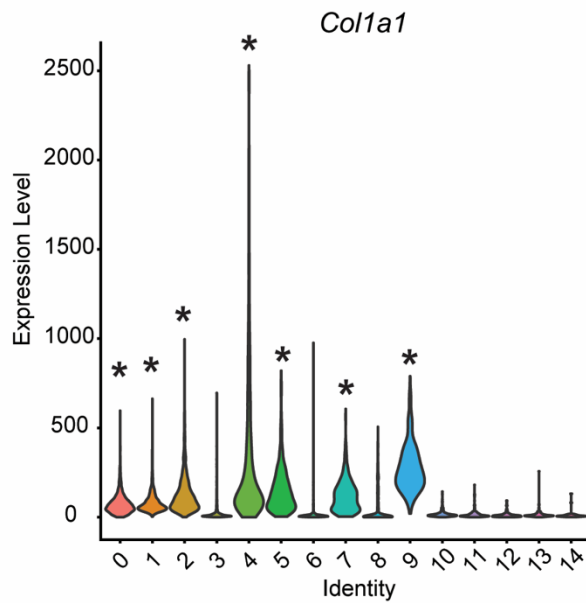

**b**

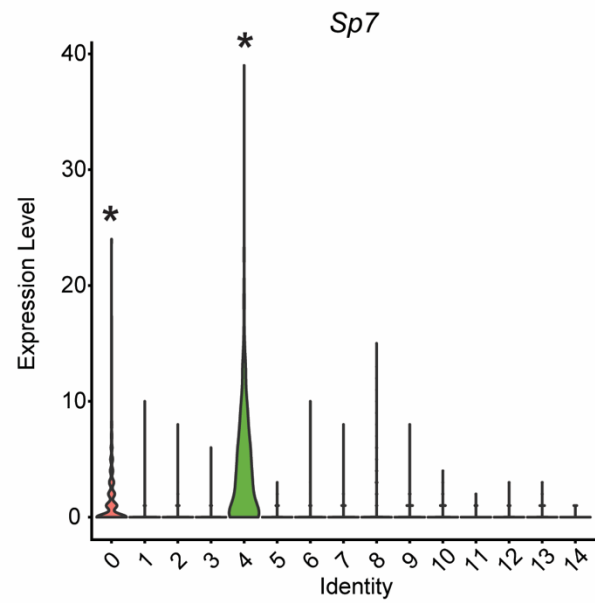

**Supplementary Figure 1. Fibroblast and osteoblast markers label mesenchymal/osteogenic clusters.** **a** Violin plot for *Col1a1*. **b** Violin plot for *Sp7*. Enriched clusters are marked by asterisks

## Supplementary Figure 2

**a**

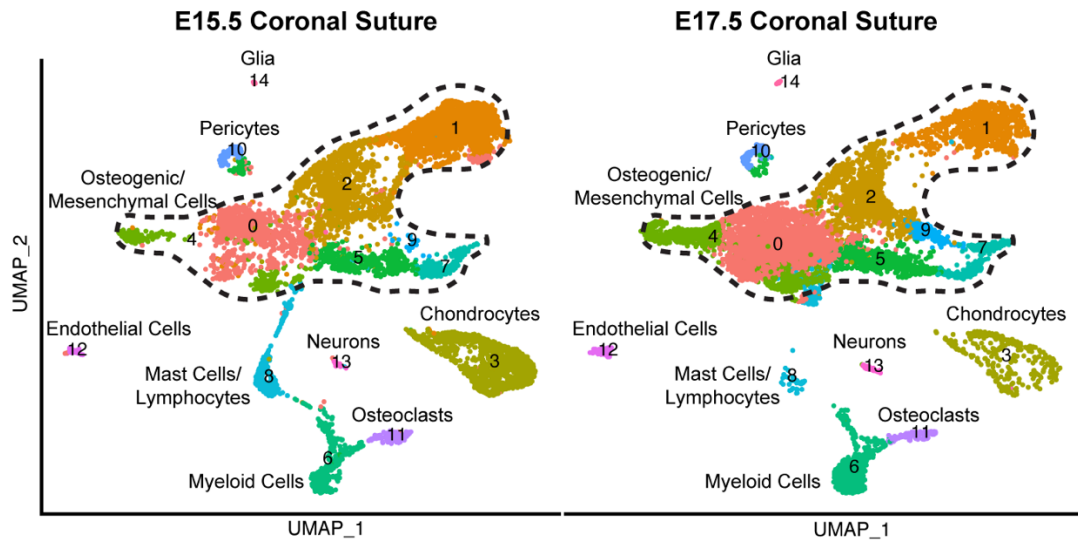

**b**

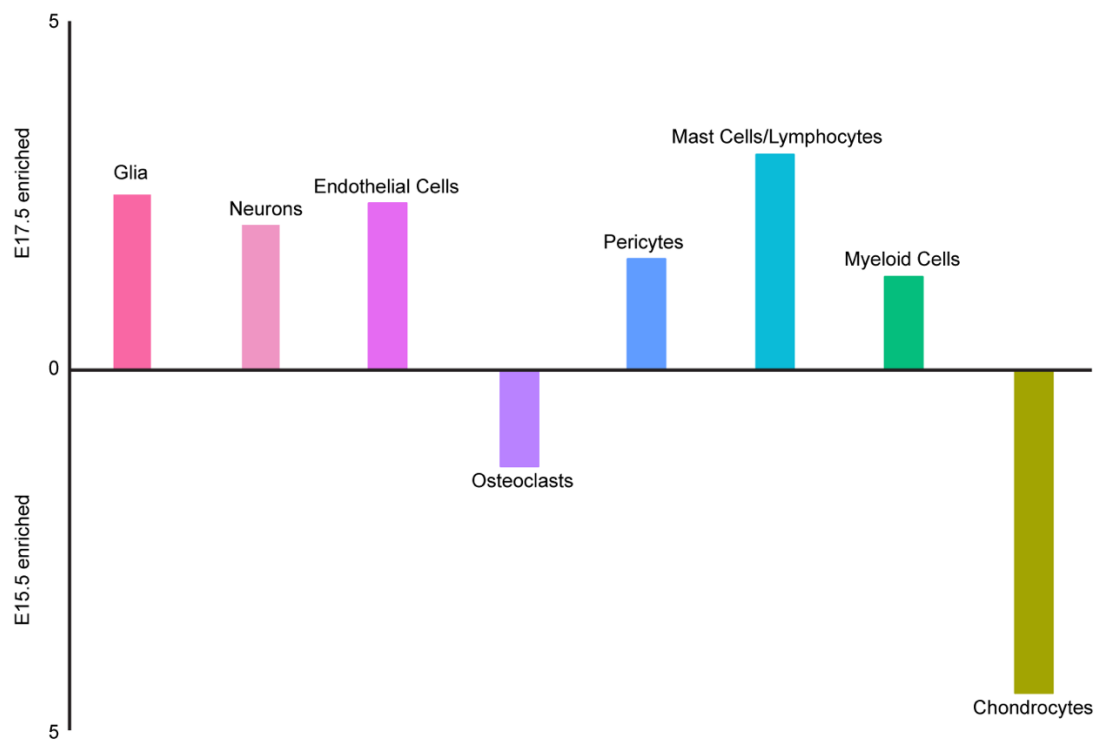

**Supplementary Figure 2. Equivalent cell types are captured at E15.5 and E17.5. a** UMAP plots separated by developmental stage. **b** Graphical depiction of the cluster proportions plotted as ratio between E15.5 and E17.5 cells within each cluster.

### Supplementary Figure 3

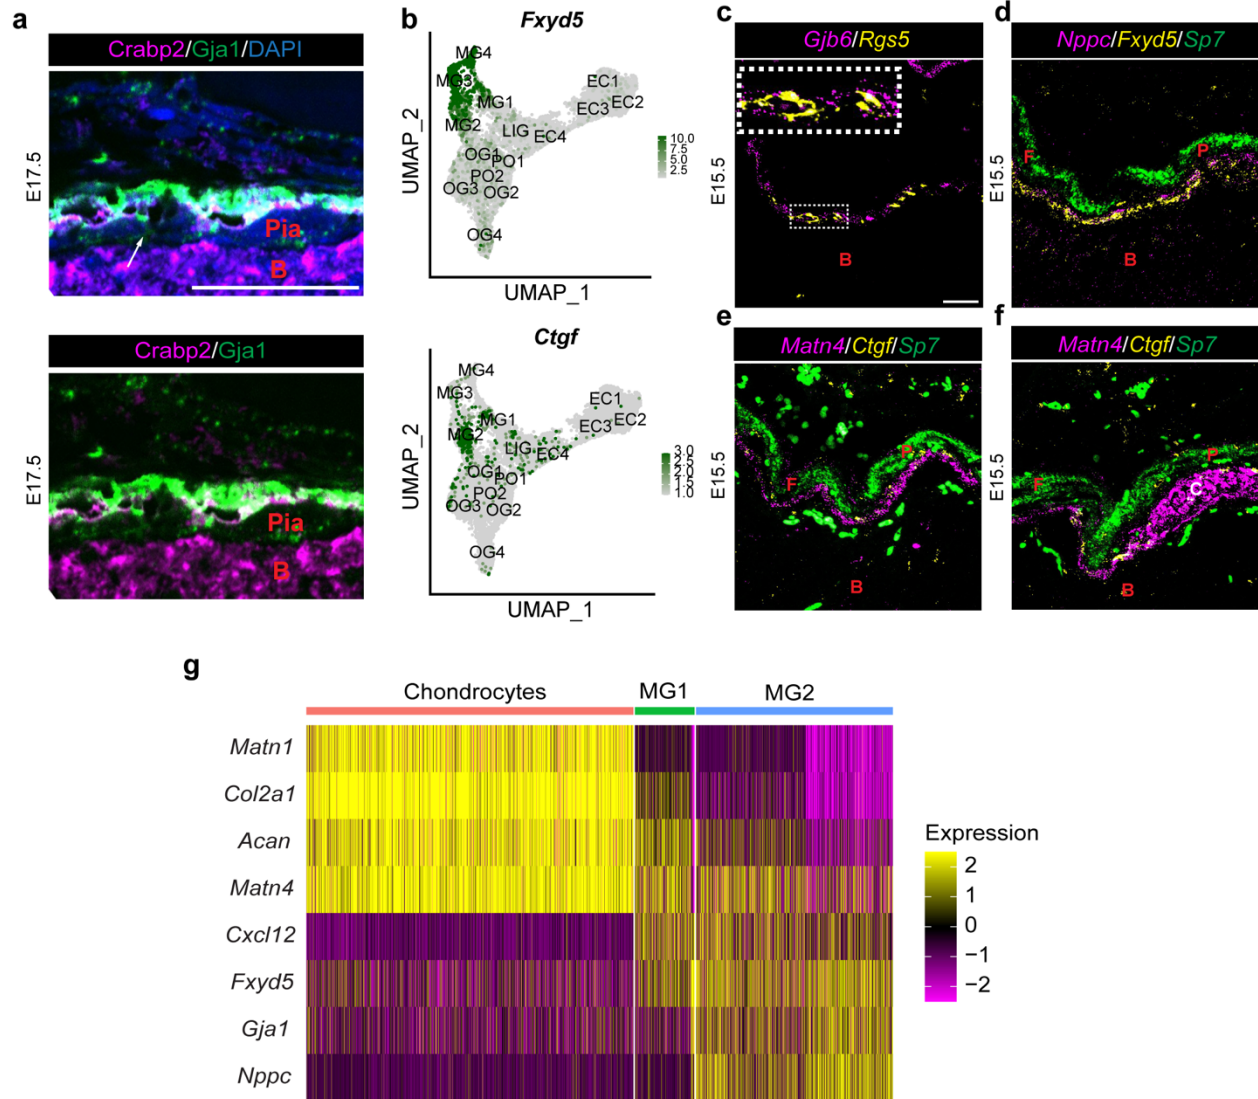

**Supplementary Figure 3. Resolving meningeal subtypes.** **a** Immunofluorescence of *Crabp2* and *Gja1* at E17.5. Scale bar = 25  $\mu$ m. **b** Feature plots of genes validated by in situ experiments. **c-f** In situ analysis of coronal sutures for indicated markers at E15.5. **c** *Gjb6* and *Rgs5*. Dashed lines highlight magnified inset. **d** *Nppc* and *Fxyd5*. **e,f** *Matn4* and *Ctgf*. *Sp7* marks the frontal (F) and parietal (P) bones in (d-f). **g** Heatmap of selected chondrocyte and dura mater markers. B, brain; C, cartilage. Scale bars = 50  $\mu$ m.

## Supplementary Figure 4

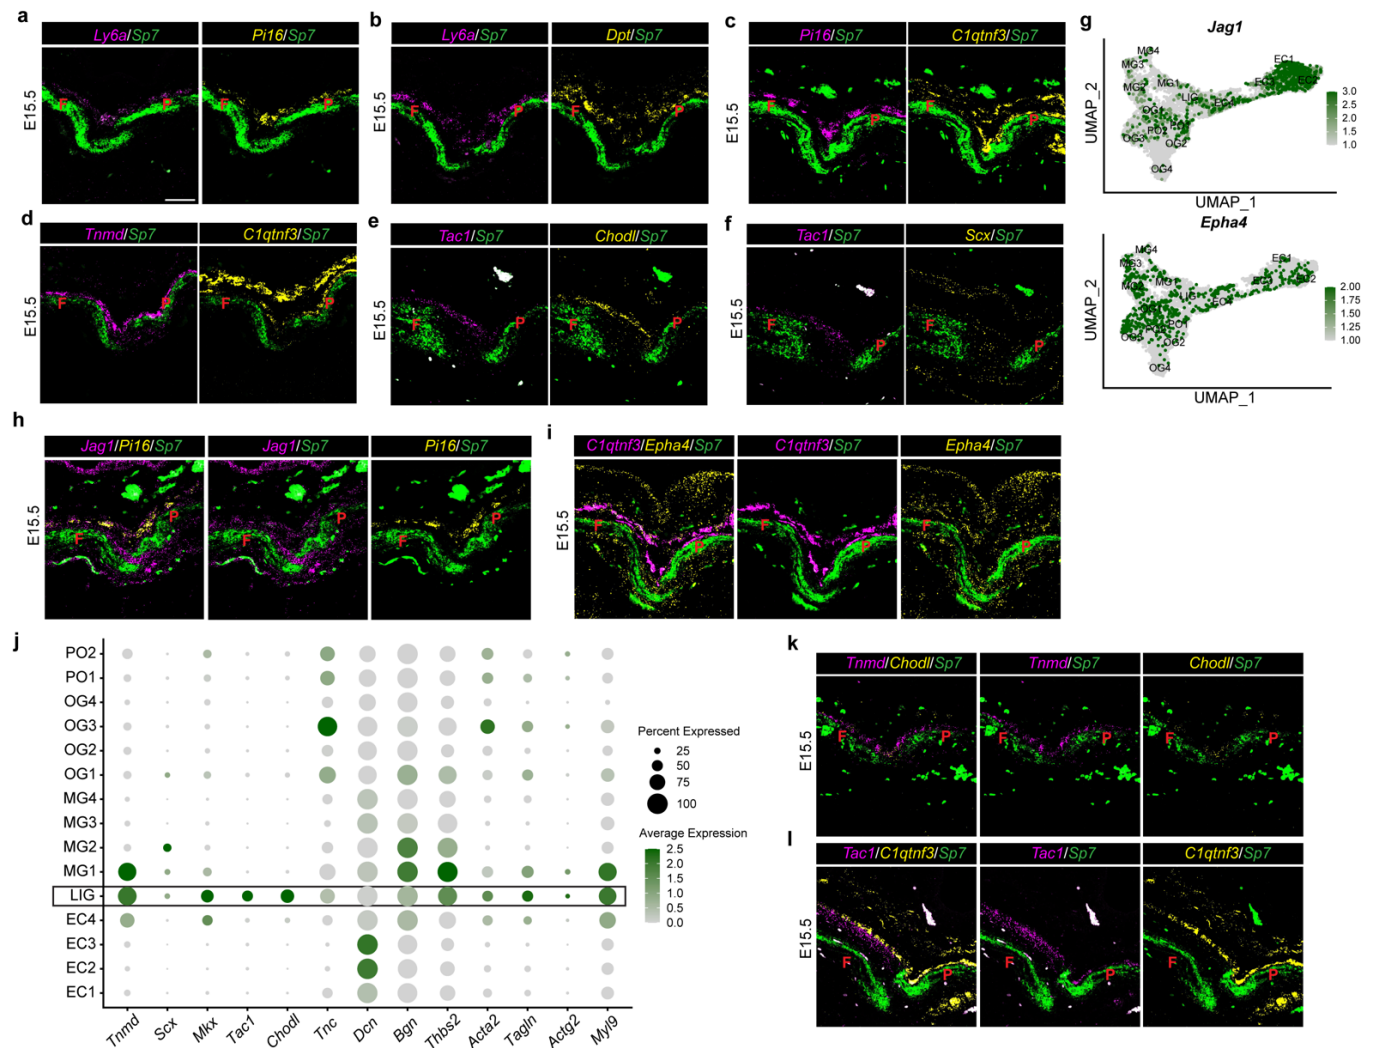

**Supplementary Figure 4. A ligament-like layer overlaps the coronal suture. a-f** Single channel images of genes evaluated in Figure 3. **g** Feature plots of genes validated by in situ experiments. **h, i** In situ analysis of coronal sutures for indicated markers at E15.5. **j** Dot plot of markers associated with tendon/ligament identity and cellular contractility. **k, l** In situ analysis for indicated markers at E15.5. *Sp7* marks the frontal (F) and parietal (P) bones in all in situs. Scale bar = 50  $\mu$ m.

**Supplementary Figure 5**

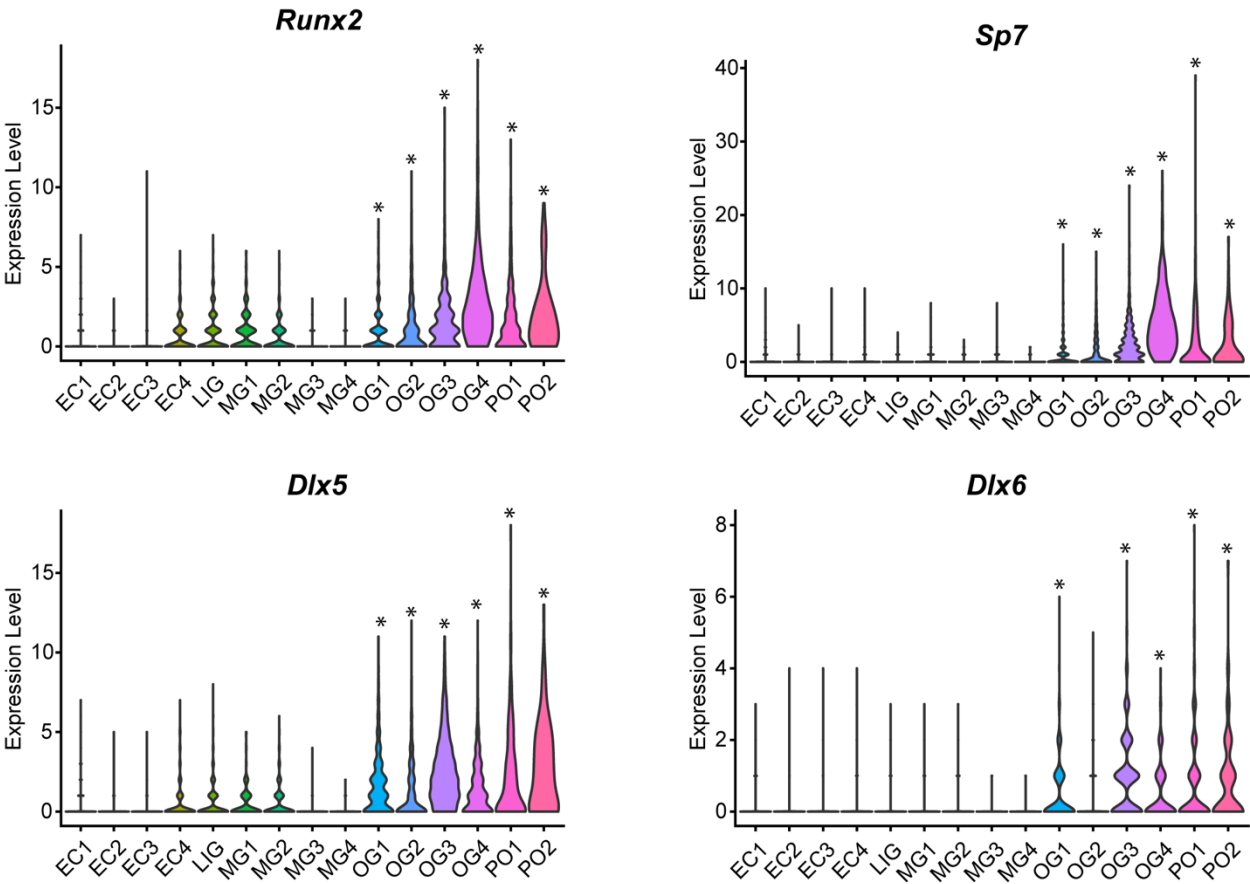

**Supplementary Figure 5. Markers for the osteogenic subset.** Violin plots for *Runx2*, *Sp7*, *Dlx5*, and *Dlx6*. Enriched clusters are marked by asterisks.

## Supplementary Figure 6

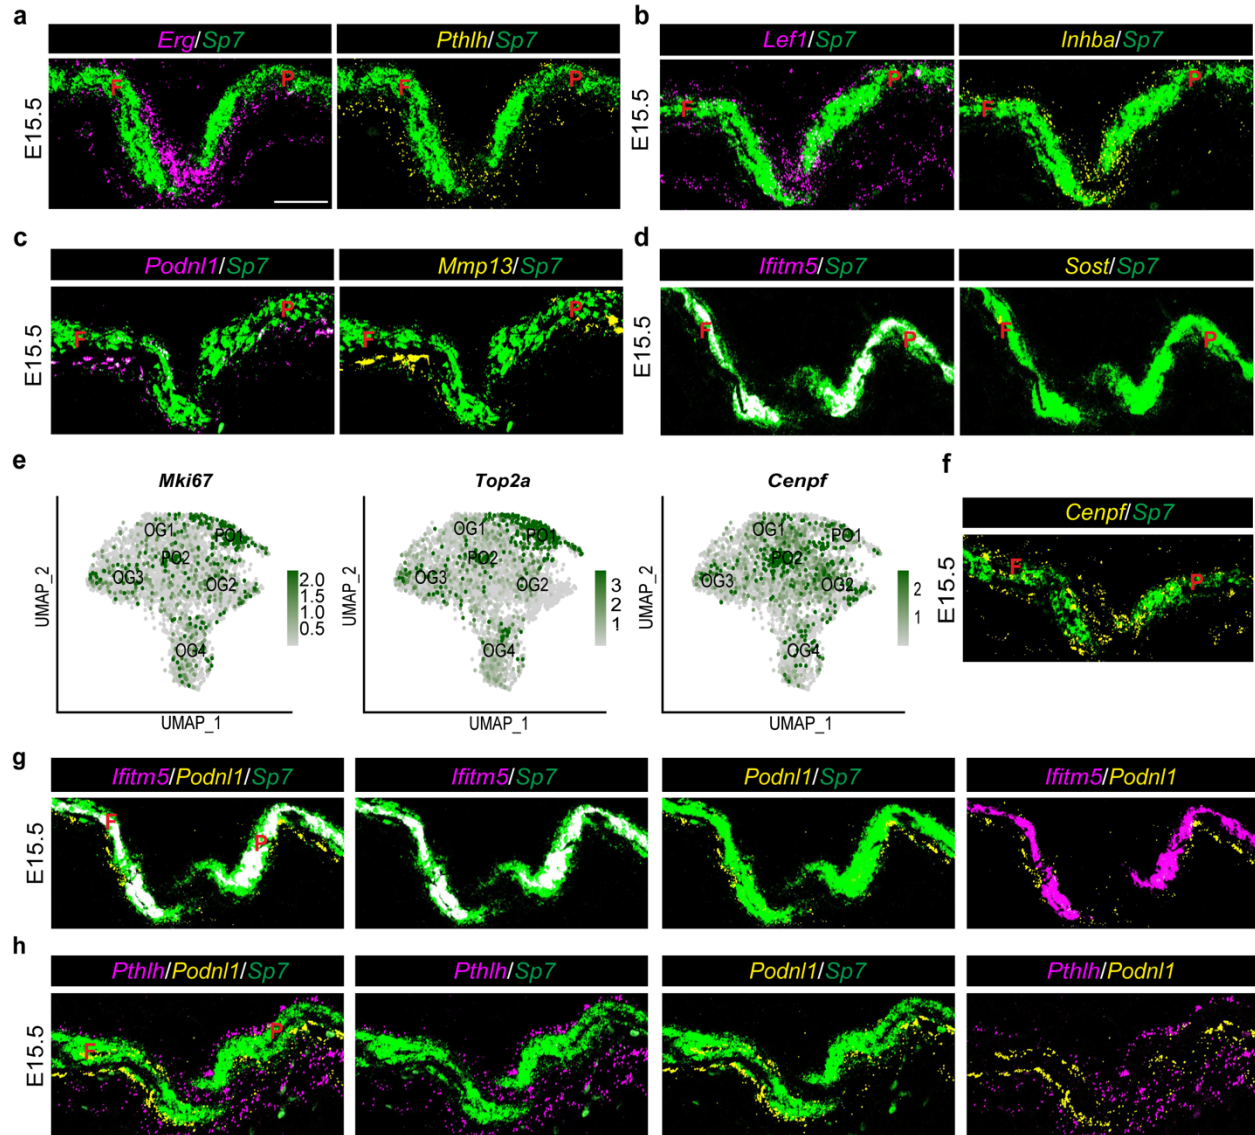

**Supplementary Figure 6. In situ analysis of osteogenesis cluster markers.** a-d Single channel images of genes evaluated in Figure 4. e Feature plots of genes marking clusters PO1 and PO2. f-h In situ analysis of coronal sutures for indicated markers at E15.5. *Sp7* marks the frontal (F) and parietal (P) bones in all in situs. Scale bar = 50  $\mu$ m.



## Supplementary Figure 7

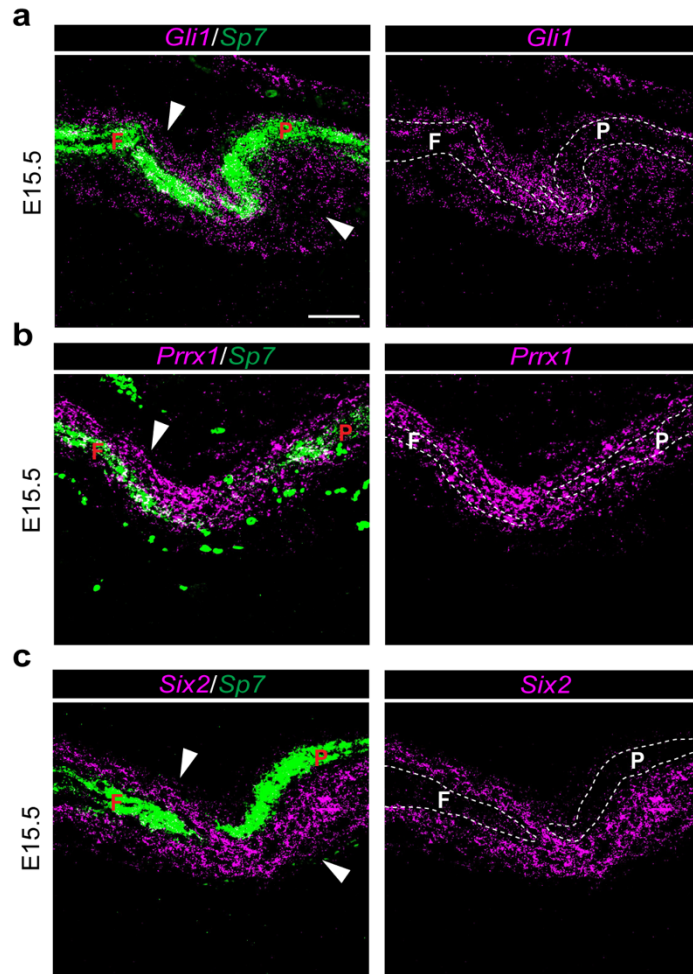

**Figure 7. Asymmetric distribution of mesenchyme across the frontal and parietal bones.**  
**a-f** In situ analysis of coronal sutures for indicated markers at E15.5. *Sp7* marks the frontal (F) and parietal (P) bones. Arrowheads indicate surfaces of bones where markers are over-enriched. Scale bar = 50  $\mu$ m.

## Supplementary Figure 8

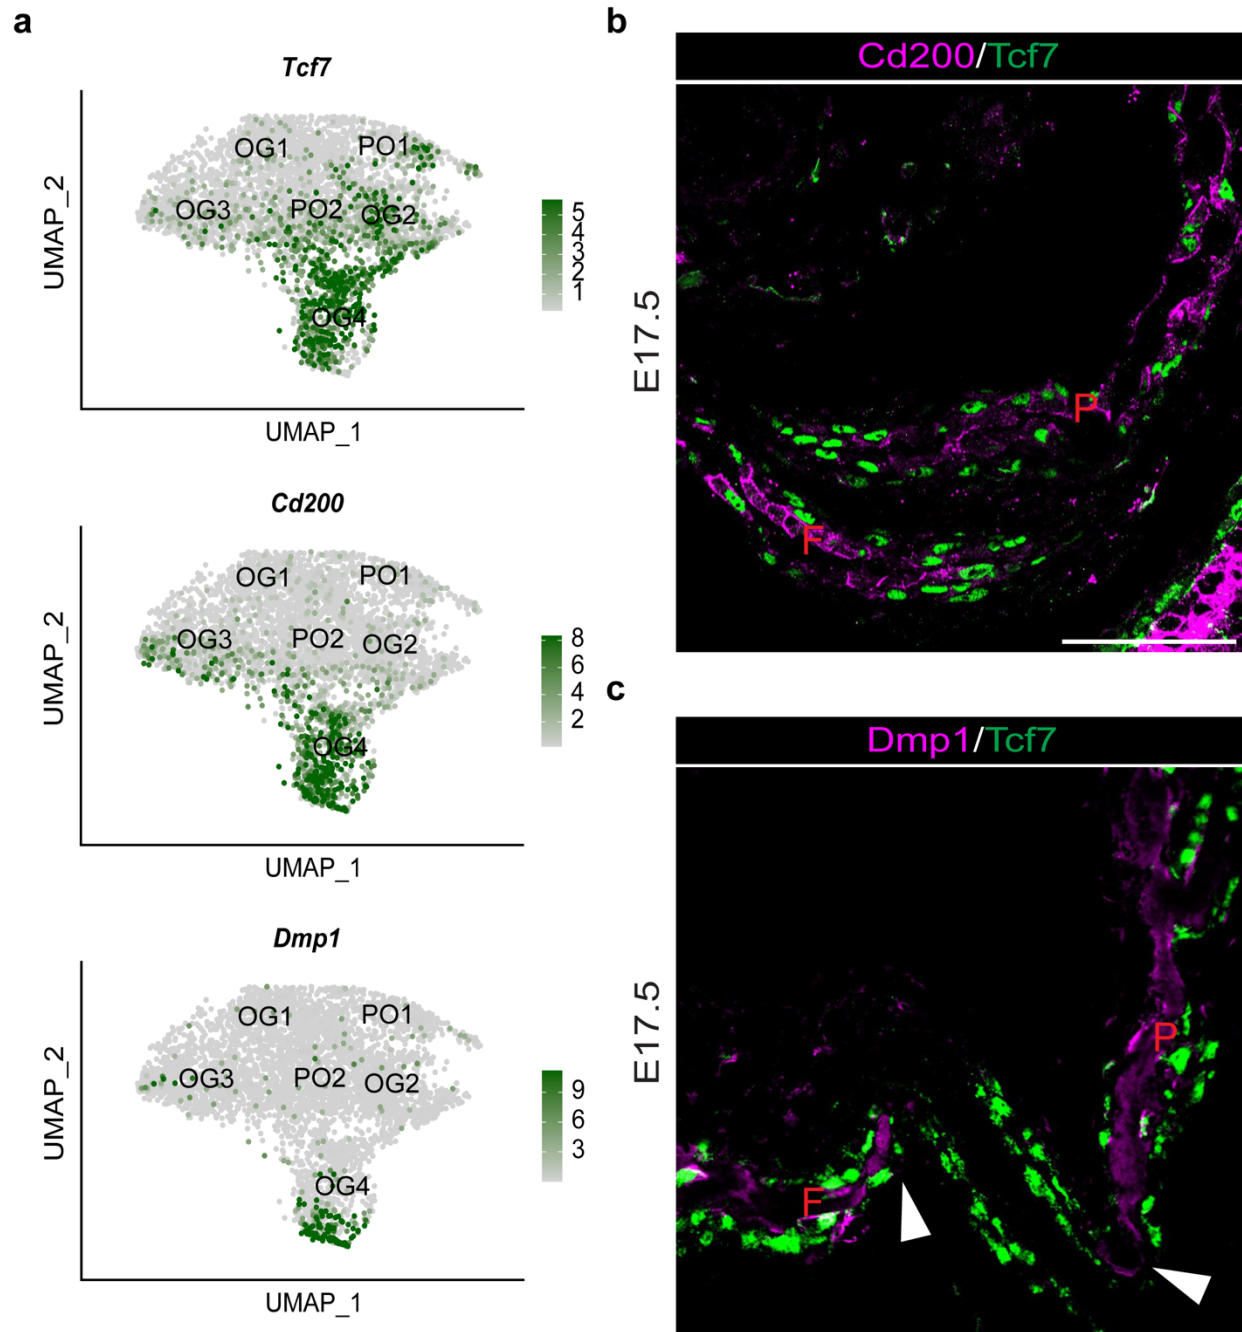

**Supplementary Figure 8. Immunofluorescent analysis resolves osteogenic subtypes within the coronal suture.** **a** Feature plots of genes validated by antibody staining. **b-c** Combinatorial antibody staining of coronal sutures for indicated markers at E17.5. Arrowheads mark beginning of *Dmp1* signal away from bone fronts. F, Frontal bone; P, Parietal bone. Scale bars = 50  $\mu$ m.



Supplementary Figure 9

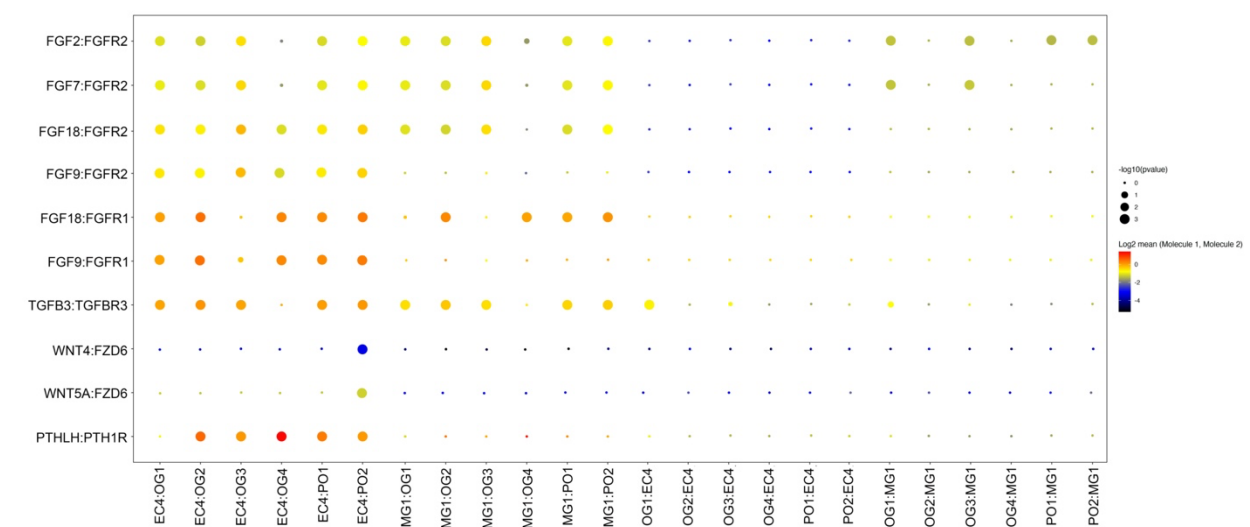

**Supplementary Figure 9. Putative signaling interactions between osteogenic and non-osteogenic populations.** Dot plot representing selected examples of ligand-receptor interactions between osteogenic and non- osteogenic clusters captured from CellPhone DB analysis.

Supplementary Figure 10

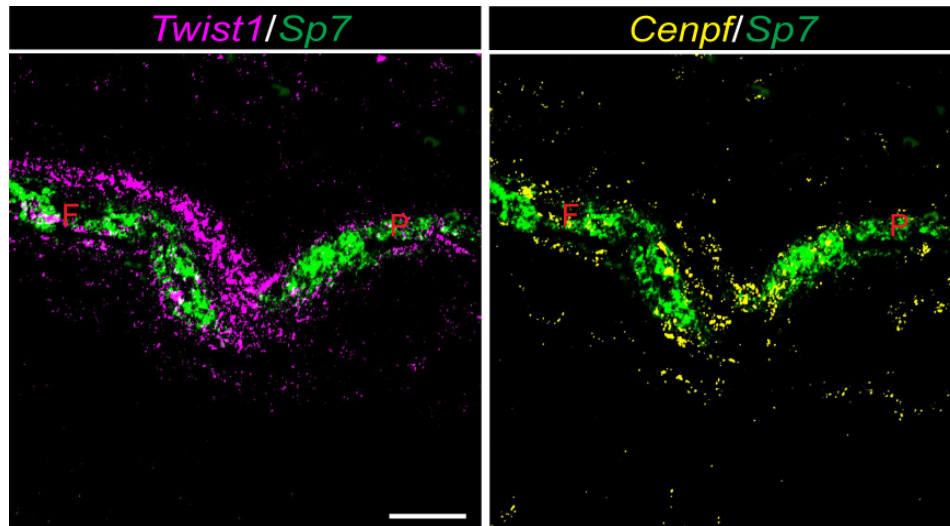

Supplementary Figure 10. *Twist1* and *Cenpf* are enriched with proliferative cells at osteogenic fronts. Single channel images of genes evaluated in Figure 6. F, Frontal bone; P, Parietal bone. Scale bars = 50  $\mu$ m.

Supplementary Figure 11

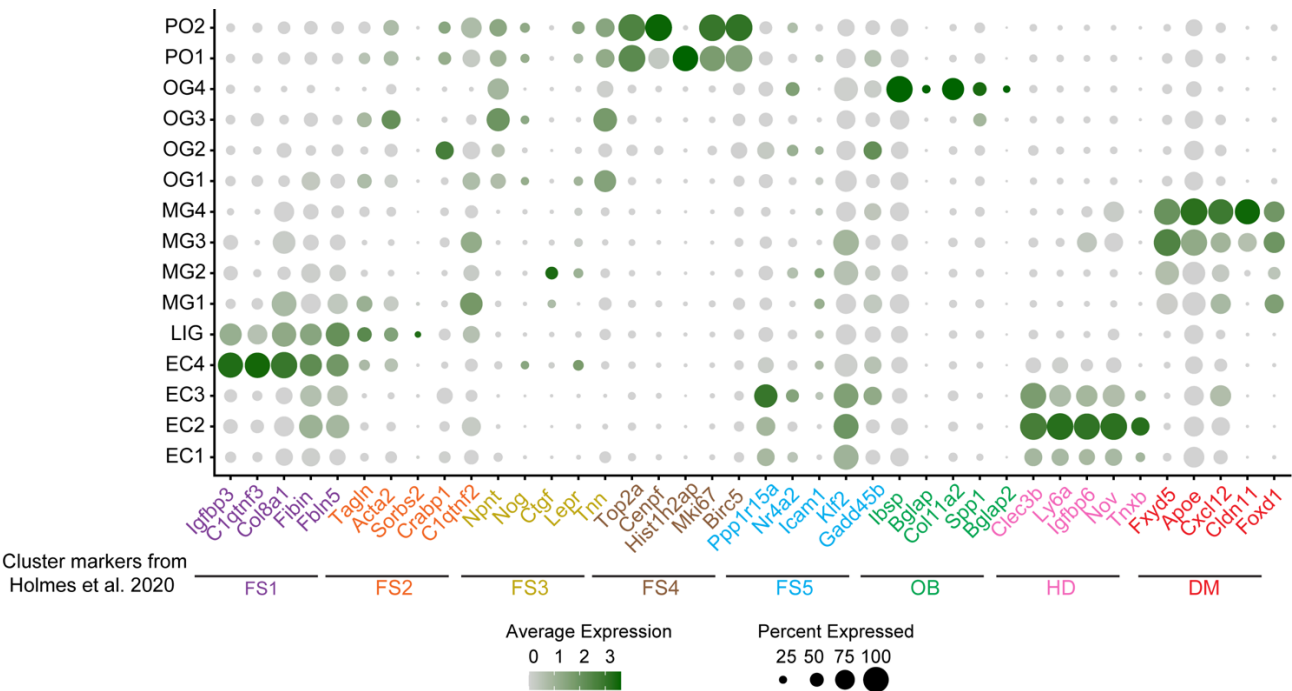

**Supplementary Figure 11. Comparison of frontal and coronal datasets.** Dot plot showing the intersection of cluster markers from Holmes et al.<sup>30</sup> with coronal suture clusters.

**Supplementary Table 1. Enriched gene list by cluster for integrated E15.5 and E17.5 datasets.** Table of enriched genes for each cluster in the E15.5/E17.5 integrated dataset using the RNA assay.

**Supplementary Table 2. Enriched gene list by cluster for integrated E15.5 and E17.5 osteogenic/mesenchymal subset.** Table of enriched genes for each cluster in the osteogenic/mesenchymal subset using the RNA assay.
