# Supplementary material for: The developing mouse coronal suture at single-cell resolution
Source: Research Square preprint supplement (doi:10.21203/rs.3.rs-135455/v1), 2021-04-09
Supplement: Supplementary file 1 [file c43516035fb374852dd8f7dc.xls]

## Sheet: E15_E17 Subset_RNA
	p_val	avg_logFC	pct.1	pct.2	p_val_adj	cluster	gene
Slc39a1	6.16849e-285	13.1905	0.946	0.427	2.0018e-280	EC1	Slc39a1
Actb	6.93022e-267	82.9129	1	0.999	2.24899e-262	EC1	Actb
Abhd2	1.78009e-182	1.44596	0.469	0.098	5.77673e-178	EC1	Abhd2
Spry2	6.035e-179	10.8214	0.541	0.145	1.95848e-174	EC1	Spry2
Rpgrip1	1.40133e-140	2.40825	0.614	0.214	4.54759e-136	EC1	Rpgrip1
Kdm6b	3.57376e-120	0.438647	0.708	0.319	1.15976e-115	EC1	Kdm6b
Cbx3	2.56363e-117	11.1516	0.992	0.894	8.31949e-113	EC1	Cbx3
Kdelr2	9.42617e-117	3.55862	0.984	0.951	3.05898e-112	EC1	Kdelr2
Alkbh5	3.60804e-108	2.85441	0.766	0.429	1.17088e-103	EC1	Alkbh5
Ttyh2	8.69618e-106	6.33974	0.394	0.11	2.82209e-101	EC1	Ttyh2
Jag1	8.59593e-95	2.41265	0.574	0.264	2.78955e-90	EC1	Jag1
Lrrc8a	1.67666e-83	2.2121	0.523	0.209	5.4411e-79	EC1	Lrrc8a
Zscan26	1.87655e-82	0.942143	0.461	0.169	6.08978e-78	EC1	Zscan26
B4galt1	2.05543e-81	3.80721	0.732	0.438	6.67028e-77	EC1	B4galt1
Rbm15	5.72276e-70	1.03463	0.372	0.127	1.85715e-65	EC1	Rbm15
Wtap	5.72308e-70	0.806949	0.761	0.504	1.85725e-65	EC1	Wtap
Insig1	1.56812e-66	6.9815	0.587	0.308	5.08887e-62	EC1	Insig1
Hsf2	4.54874e-65	0.617422	0.319	0.102	1.47616e-60	EC1	Hsf2
Ric1	9.80689e-64	0.410779	0.434	0.173	3.18253e-59	EC1	Ric1
Kmt2d	4.20924e-62	0.726212	0.421	0.169	1.36598e-57	EC1	Kmt2d
Marf1	5.2743e-60	1.00937	0.526	0.249	1.71162e-55	EC1	Marf1
Pdcd4	5.63387e-56	0.867305	0.837	0.656	1.8283e-51	EC1	Pdcd4
Fxyd4	3.01201e-55	1.13773	0.293	0.1	9.77458e-51	EC1	Fxyd4
Supt16	1.34476e-50	2.61442	0.633	0.383	4.364e-46	EC1	Supt16
Tram2	3.01895e-50	0.989219	0.474	0.231	9.7971e-46	EC1	Tram2
Tsku	3.00205e-49	1.48248	0.405	0.183	9.74227e-45	EC1	Tsku
Ncoa3	7.00447e-43	0.436644	0.341	0.142	2.27309e-38	EC1	Ncoa3
Rap2b	3.38382e-41	4.66511	0.534	0.321	1.09812e-36	EC1	Rap2b
Iqsec1	1.22136e-38	1.22001	0.467	0.255	3.96355e-34	EC1	Iqsec1
Myef2	3.67326e-36	3.22486	0.514	0.301	1.19205e-31	EC1	Myef2
Paip1	8.52528e-36	0.588901	0.375	0.185	2.76662e-31	EC1	Paip1
Dusp3	1.14465e-35	1.40644	0.421	0.223	3.71461e-31	EC1	Dusp3
Gatad1	5.59318e-35	0.868081	0.628	0.402	1.8151e-30	EC1	Gatad1
Bmp2k	3.7172e-33	0.472918	0.279	0.118	1.20631e-28	EC1	Bmp2k
Mcmbp	1.7316e-32	1.79462	0.569	0.359	5.61937e-28	EC1	Mcmbp
Pan3	9.83552e-32	0.596538	0.386	0.201	3.19182e-27	EC1	Pan3
Gsk3b	4.59501e-31	5.34456	0.799	0.66	1.49117e-26	EC1	Gsk3b
Clasp2	1.14405e-30	0.428902	0.287	0.129	3.71267e-26	EC1	Clasp2
Lgr4	2.50996e-29	0.603483	0.303	0.143	8.14531e-25	EC1	Lgr4
Npm1	7.26216e-28	10.8866	0.989	0.998	2.35672e-23	EC1	Npm1
Dctn4	1.30872e-27	0.971794	0.483	0.301	4.24705e-23	EC1	Dctn4
Gnb1	3.73046e-27	2.72351	0.874	0.776	1.21061e-22	EC1	Gnb1
Otub1	9.44993e-27	0.935525	0.689	0.498	3.06669e-22	EC1	Otub1
H3f3a	5.92004e-26	1.74962	0.971	0.996	1.92117e-21	EC1	H3f3a
Srsf11	1.21757e-25	2.8132	0.762	0.887	3.95124e-21	EC1	Srsf11
Reep5	2.70585e-25	0.778947	0.852	0.927	8.78102e-21	EC1	Reep5
Cct5	8.4921e-25	1.34261	0.823	0.916	2.75586e-20	EC1	Cct5
Cd81	8.62696e-25	2.91177	0.978	0.997	2.79962e-20	EC1	Cd81
Klhl9	1.26039e-24	0.561293	0.624	0.475	4.09022e-20	EC1	Klhl9
Gm26771	2.30935e-24	1.49885	0.514	0.356	7.49429e-20	EC1	Gm26771
Eif3m	1.98271e-22	3.16578	0.662	0.811	6.43428e-18	EC1	Eif3m
Runx1t1	7.68521e-22	7.67862	0.507	0.347	2.494e-17	EC1	Runx1t1
Yme1l1	2.76741e-20	2.21168	0.648	0.516	8.98081e-16	EC1	Yme1l1
Psmd7	3.48596e-20	1.96246	0.759	0.878	1.13126e-15	EC1	Psmd7
2020-09-10	4.7545e-20	0.505022	0.313	0.172	1.54293e-15	EC1	2020-09-10
Tmf1	2.34947e-19	1.35952	0.598	0.459	7.62449e-15	EC1	Tmf1
Cct8	2.74402e-19	0.330066	0.724	0.836	8.90489e-15	EC1	Cct8
Higd2a	2.95729e-19	0.865429	0.574	0.713	9.597e-15	EC1	Higd2a
Napa	3.94476e-19	0.352051	0.624	0.768	1.28015e-14	EC1	Napa
Mtmr2	2.90647e-18	0.306152	0.423	0.27	9.43208e-14	EC1	Mtmr2
Mkl2	1.18395e-17	0.533547	0.335	0.2	3.84216e-13	EC1	Mkl2
Adamts2	1.90371e-17	0.294178	0.442	0.599	6.17791e-13	EC1	Adamts2
Uvssa	2.32721e-17	0.467367	0.404	0.265	7.55225e-13	EC1	Uvssa
Anxa6	2.5041e-17	2.07776	0.729	0.847	8.12632e-13	EC1	Anxa6
Serbp1	2.95611e-17	2.90359	0.927	0.975	9.59316e-13	EC1	Serbp1
Glrx3	3.08482e-17	1.55924	0.746	0.83	1.00108e-12	EC1	Glrx3
Ddx39b	5.33544e-17	1.29819	0.687	0.809	1.73146e-12	EC1	Ddx39b
Cavin1	1.21585e-16	2.25714	0.458	0.336	3.94568e-12	EC1	Cavin1
Psma3	5.0517e-16	2.90772	0.842	0.909	1.63938e-11	EC1	Psma3
Aldh1a3	9.22533e-16	1.1515	0.329	0.197	2.99381e-11	EC1	Aldh1a3
Tek	2.15215e-15	1.62556	0.359	0.224	6.98416e-11	EC1	Tek
Ythdf2	2.20674e-15	0.568995	0.552	0.404	7.16131e-11	EC1	Ythdf2
Tkt	3.15246e-15	0.514994	0.612	0.748	1.02304e-10	EC1	Tkt
Khsrp	4.11597e-15	0.601551	0.276	0.161	1.33571e-10	EC1	Khsrp
Galnt17	7.13072e-15	0.455784	0.311	0.186	2.31406e-10	EC1	Galnt17
Foxn2	1.05086e-14	0.385868	0.27	0.156	3.41027e-10	EC1	Foxn2
Agtr2	1.16368e-14	5.91145	0.59	0.457	3.77638e-10	EC1	Agtr2
Pa2g4	1.26069e-14	4.1908	0.561	0.692	4.09119e-10	EC1	Pa2g4
Hnrnpc	1.67399e-14	0.696221	0.874	0.916	5.43243e-10	EC1	Hnrnpc
Polr2f	4.62921e-14	0.696186	0.769	0.857	1.50227e-09	EC1	Polr2f
Igf2r	3.28409e-13	2.32014	0.722	0.654	1.06575e-08	EC1	Igf2r
Taldo1	4.73947e-13	0.517984	0.526	0.662	1.53805e-08	EC1	Taldo1
Tacc1	4.91259e-13	1.37139	0.357	0.24	1.59424e-08	EC1	Tacc1
Mapk1ip1l	5.04694e-13	0.719769	0.501	0.382	1.63783e-08	EC1	Mapk1ip1l
Impact	7.15749e-13	0.309318	0.364	0.245	2.32275e-08	EC1	Impact
Calu	9.43656e-13	1.37136	0.89	0.947	3.06235e-08	EC1	Calu
Sdc4	1.42505e-12	9.0051	0.502	0.376	4.62456e-08	EC1	Sdc4
Rtl3	3.04257e-12	0.603545	0.411	0.298	9.87373e-08	EC1	Rtl3
Tmem165	6.35907e-12	0.560297	0.614	0.747	2.06364e-07	EC1	Tmem165
Actr2	1.38752e-11	0.480341	0.536	0.426	4.50279e-07	EC1	Actr2
Atpif1	1.77136e-11	3.55071	0.954	0.984	5.74843e-07	EC1	Atpif1
Cdkn1b	7.22494e-11	0.52626	0.278	0.179	2.34464e-06	EC1	Cdkn1b
Chchd1	7.29523e-11	0.257896	0.695	0.783	2.36745e-06	EC1	Chchd1
Upf1	7.51641e-11	0.520841	0.295	0.192	2.43922e-06	EC1	Upf1
Tmeff2	7.67909e-11	3.97483	0.448	0.334	2.49202e-06	EC1	Tmeff2
Hspd1	8.70528e-11	6.80431	0.758	0.834	2.82504e-06	EC1	Hspd1
Dlg4	9.82897e-11	1.10088	0.376	0.27	3.1897e-06	EC1	Dlg4
Hspe1	1.34921e-10	4.24097	0.922	0.968	4.37845e-06	EC1	Hspe1
Golt1b	1.77894e-10	0.308559	0.681	0.61	5.77303e-06	EC1	Golt1b
Lamp2	2.00363e-10	1.04126	0.611	0.761	6.50217e-06	EC1	Lamp2
Ppp2r4	2.08999e-10	0.829553	0.188	0.301	6.78242e-06	EC1	Ppp2r4
Rab32	2.31136e-10	0.312024	0.271	0.175	7.50083e-06	EC1	Rab32
Tmem263	3.23514e-10	0.319026	0.785	0.708	1.04987e-05	EC1	Tmem263
B830012L14Rik	7.44177e-10	1.31836	0.289	0.196	2.415e-05	EC1	B830012L14Rik
2020-09-07	9.64651e-10	15.9009	0.861	0.951	3.13049e-05	EC1	2020-09-07
Mrpl51	1.21446e-09	0.45178	0.646	0.706	3.94116e-05	EC1	Mrpl51
Pim1	1.23864e-09	0.400204	0.313	0.214	4.01964e-05	EC1	Pim1
Vasn	1.28126e-09	4.2132	0.29	0.401	4.15793e-05	EC1	Vasn
Hspa9	1.30254e-09	0.927137	0.587	0.677	4.227e-05	EC1	Hspa9
Gapdh	1.72413e-09	6.88238	0.939	0.978	5.59514e-05	EC1	Gapdh
Acan	2.06666e-09	2.90604	0.228	0.335	6.70673e-05	EC1	Acan
Skil	2.17672e-09	0.86091	0.459	0.35	7.0639e-05	EC1	Skil
Psmb7	2.2602e-09	0.491471	0.734	0.802	7.3348e-05	EC1	Psmb7
Ergic2	2.27053e-09	1.23783	0.611	0.708	7.36831e-05	EC1	Ergic2
Arhgap20	2.38187e-09	0.254193	0.435	0.327	7.72965e-05	EC1	Arhgap20
Filip1l	3.77899e-09	1.05704	0.418	0.324	0.000122636	EC1	Filip1l
Fbl	6.97591e-09	2.14779	0.691	0.763	0.000226382	EC1	Fbl
Mettl9	7.50853e-09	0.352236	0.684	0.766	0.000243667	EC1	Mettl9
Rbbp4	8.75064e-09	2.12714	0.537	0.648	0.000283976	EC1	Rbbp4
Gar1	1.5096e-08	1.68733	0.445	0.546	0.000489897	EC1	Gar1
Adh5	1.56009e-08	13.9129	0.469	0.577	0.000506282	EC1	Adh5
Hmgcr	1.8803e-08	1.0238	0.333	0.244	0.000610195	EC1	Hmgcr
Nectin2	2.01636e-08	0.460717	0.274	0.186	0.00065435	EC1	Nectin2
Spats2l	2.1809e-08	1.48655	0.63	0.732	0.000707745	EC1	Spats2l
Rpl27-ps3	2.27459e-08	0.279741	0.507	0.597	0.00073815	EC1	Rpl27-ps3
Gpc4	2.29883e-08	0.65855	0.263	0.367	0.000746016	EC1	Gpc4
Sdhc	4.01867e-08	1.48362	0.547	0.644	0.00130414	EC1	Sdhc
Rbms3	4.05453e-08	1.85252	0.622	0.555	0.00131578	EC1	Rbms3
Ifngr2	4.40424e-08	1.64147	0.451	0.564	0.00142926	EC1	Ifngr2
Tbck	7.96e-08	0.416927	0.308	0.222	0.00258318	EC1	Tbck
Pabpc4l	8.30709e-08	0.294055	0.279	0.197	0.00269582	EC1	Pabpc4l
Sh3bgrl3	8.51558e-08	4.69876	0.895	0.941	0.00276348	EC1	Sh3bgrl3
Skp1a	1.03263e-07	0.528789	0.788	0.831	0.00335108	EC1	Skp1a
Ddx18	1.08083e-07	0.403116	0.423	0.537	0.00350751	EC1	Ddx18
Tmem37	1.09336e-07	0.451868	0.295	0.213	0.00354816	EC1	Tmem37
Rbm25	1.18881e-07	0.552681	0.807	0.844	0.00385793	EC1	Rbm25
Lrrn4cl	2.52891e-07	0.894299	0.295	0.206	0.00820681	EC1	Lrrn4cl
Cul1	2.71287e-07	3.62688	0.424	0.533	0.00880381	EC1	Cul1
Cwc15	2.90028e-07	0.617291	0.596	0.684	0.00941198	EC1	Cwc15
Ube2e3	3.20694e-07	0.94944	0.585	0.692	0.0104072	EC1	Ube2e3
Esf1	6.21406e-07	0.570721	0.41	0.504	0.0201659	EC1	Esf1
Luc7l3	1.08119e-06	2.26409	0.478	0.575	0.0350867	EC1	Luc7l3
Hmgn2	1.39999e-06	2.89373	0.882	0.914	0.0454325	EC1	Hmgn2
Setd5	1.50832e-06	0.577232	0.557	0.656	0.0489479	EC1	Setd5
Bzw1	1.66657e-06	4.38837	0.807	0.877	0.0540835	EC1	Bzw1
Phldb2	1.94301e-06	0.830223	0.311	0.398	0.0630546	EC1	Phldb2
Pabpc1	2.01256e-06	2.23697	0.952	0.979	0.0653116	EC1	Pabpc1
Hnrnpab	2.28148e-06	0.970267	0.789	0.827	0.0740384	EC1	Hnrnpab
Psme2	2.4431e-06	0.414678	0.595	0.715	0.0792834	EC1	Psme2
Cops2	2.45016e-06	1.03877	0.402	0.501	0.0795126	EC1	Cops2
Anp32e	2.51503e-06	1.65682	0.51	0.585	0.0816178	EC1	Anp32e
Tcf12	3.64978e-06	1.55343	0.488	0.572	0.118443	EC1	Tcf12
Ammecr1	3.94741e-06	3.87017	0.3	0.222	0.128101	EC1	Ammecr1
Ap2a2	4.05893e-06	0.885125	0.77	0.745	0.13172	EC1	Ap2a2
Naa20	4.08311e-06	0.277579	0.456	0.526	0.132505	EC1	Naa20
Xrn2	4.73204e-06	1.08794	0.456	0.541	0.153564	EC1	Xrn2
Nop56	5.30771e-06	0.877028	0.589	0.67	0.172246	EC1	Nop56
Pitpna	5.59438e-06	0.582522	0.376	0.463	0.181549	EC1	Pitpna
Txlna	8.13717e-06	0.32808	0.536	0.631	0.264067	EC1	Txlna
Trir	8.66069e-06	1.58032	0.419	0.327	0.281057	EC1	Trir
Arpc5l	8.75779e-06	0.2946	0.467	0.548	0.284208	EC1	Arpc5l
Oaz2	9.14702e-06	0.33971	0.692	0.738	0.296839	EC1	Oaz2
Pdzd8	9.26698e-06	0.332658	0.297	0.226	0.300732	EC1	Pdzd8
Lap3	1.50869e-05	3.02619	0.389	0.472	0.4896	EC1	Lap3
Hs6st2	1.60777e-05	1.16219	0.33	0.264	0.521754	EC1	Hs6st2
Got2	1.63048e-05	0.278358	0.346	0.429	0.529123	EC1	Got2
Zc3h13	1.77128e-05	0.525844	0.411	0.5	0.574815	EC1	Zc3h13
Vps28	1.87603e-05	0.570981	0.346	0.272	0.608809	EC1	Vps28
Eloc	2.09642e-05	1.83458	0.437	0.354	0.680331	EC1	Eloc
Pcdh19	2.66629e-05	1.10243	0.365	0.289	0.865265	EC1	Pcdh19
Peg3	3.06056e-05	0.755272	0.907	0.949	0.993213	EC1	Peg3
Smarca5	3.28958e-05	1.32218	0.518	0.605	1	EC1	Smarca5
Vasp	4.49581e-05	1.56206	0.419	0.487	1	EC1	Vasp
Nit1	5.21651e-05	0.255691	0.265	0.202	1	EC1	Nit1
Stim2	5.35478e-05	0.44757	0.27	0.209	1	EC1	Stim2
Map1lc3a	5.52904e-05	2.33651	0.852	0.899	1	EC1	Map1lc3a
St13	5.59257e-05	1.92999	0.841	0.854	1	EC1	St13
Kcne4	6.11803e-05	0.36945	0.183	0.252	1	EC1	Kcne4
Ilkap	6.54504e-05	1.64108	0.496	0.579	1	EC1	Ilkap
Dnajc7	8.41229e-05	0.869582	0.466	0.54	1	EC1	Dnajc7
Chchd3	8.5782e-05	2.28095	0.445	0.513	1	EC1	Chchd3
Hspa4	8.59992e-05	2.46303	0.41	0.476	1	EC1	Hspa4
Akt2	8.76988e-05	0.705918	0.381	0.458	1	EC1	Akt2
Fubp1	0.000118481	1.21516	0.617	0.67	1	EC1	Fubp1
Rtraf	0.000122568	0.788926	0.486	0.41	1	EC1	Rtraf
Ddit4	0.000143417	3.56347	0.193	0.26	1	EC1	Ddit4
Nfyc	0.000147985	2.54684	0.292	0.355	1	EC1	Nfyc
Ino80b	0.000152863	1.01263	0.262	0.331	1	EC1	Ino80b
Wdr43	0.000153581	0.378961	0.418	0.488	1	EC1	Wdr43
Gspt1	0.000157302	1.49358	0.612	0.676	1	EC1	Gspt1
Cryzl1	0.000214725	0.308729	0.293	0.37	1	EC1	Cryzl1
Hnrnpu	0.000219965	0.537979	0.786	0.837	1	EC1	Hnrnpu
Ldhb	0.000244506	0.590233	0.262	0.334	1	EC1	Ldhb
Srrm2	0.000246933	7.10863	0.936	0.954	1	EC1	Srrm2
Rnd3	0.000248406	5.51013	0.555	0.535	1	EC1	Rnd3
Cyth3	0.000262292	0.254142	0.249	0.316	1	EC1	Cyth3
Rpa2	0.000269506	0.584307	0.378	0.435	1	EC1	Rpa2
Arid4b	0.000285522	0.58332	0.453	0.534	1	EC1	Arid4b
Tnfrsf1a	0.000296446	1.47116	0.375	0.45	1	EC1	Tnfrsf1a
Pfdn4	0.000328244	0.933132	0.549	0.611	1	EC1	Pfdn4
Emp1	0.000351444	1.07958	0.837	0.872	1	EC1	Emp1
Nucks1	0.000353596	4.51046	0.684	0.726	1	EC1	Nucks1
Eif3a	0.00035429	5.59585	0.799	0.856	1	EC1	Eif3a
Ccser2	0.000372017	0.616386	0.504	0.559	1	EC1	Ccser2
Dusp10	0.000394044	0.57494	0.274	0.22	1	EC1	Dusp10
Thy1	0.000499472	1.74467	0.528	0.45	1	EC1	Thy1
Smarca4	0.000502994	0.260844	0.388	0.45	1	EC1	Smarca4
Pgk1	0.000565844	8.78872	0.455	0.403	1	EC1	Pgk1
Mrpl11	0.000650474	0.317565	0.413	0.475	1	EC1	Mrpl11
Rsrc2	0.000650802	8.81677	0.774	0.797	1	EC1	Rsrc2
Tspan5	0.00065527	0.389756	0.399	0.347	1	EC1	Tspan5
Tmem5	0.000661207	0.62524	0.573	0.644	1	EC1	Tmem5
Mrpl58	0.00069842	0.560247	0.285	0.228	1	EC1	Mrpl58
Rpp30	0.000746899	0.626991	0.198	0.257	1	EC1	Rpp30
Nrip1	0.000809375	0.356872	0.252	0.311	1	EC1	Nrip1
Flywch2	0.000976424	0.272695	0.289	0.234	1	EC1	Flywch2
Limd2	0.000998847	0.263124	0.55	0.609	1	EC1	Limd2
Cdkn1c	0.00103079	71.8579	0.981	0.996	1	EC1	Cdkn1c
Kpnb1	0.00107116	0.26351	0.448	0.504	1	EC1	Kpnb1
Ccni	0.00114499	0.605867	0.498	0.556	1	EC1	Ccni
Tcf25	0.00117858	0.447619	0.748	0.838	1	EC1	Tcf25
Eif5b	0.00122041	1.73238	0.802	0.873	1	EC1	Eif5b
Ext1	0.00138655	0.558444	0.419	0.365	1	EC1	Ext1
Bclaf1	0.00158145	0.478555	0.612	0.675	1	EC1	Bclaf1
Bcat1	0.00165732	0.368152	0.317	0.366	1	EC1	Bcat1
Med21	0.00166942	0.260142	0.589	0.672	1	EC1	Med21
Nudt5	0.00169077	18.6059	0.386	0.438	1	EC1	Nudt5
Spty2d1	0.00186414	1.11357	0.47	0.431	1	EC1	Spty2d1
Numa1	0.00191155	0.552462	0.233	0.291	1	EC1	Numa1
Tomm40	0.00195427	3.4053	0.472	0.523	1	EC1	Tomm40
Tubb2b	0.00201886	5.54487	0.506	0.457	1	EC1	Tubb2b
Nadk	0.00208694	0.290699	0.338	0.395	1	EC1	Nadk
Zfp36l2	0.0022354	0.538379	0.426	0.488	1	EC1	Zfp36l2
Erg28	0.00230321	0.636585	0.3	0.251	1	EC1	Erg28
Rest	0.0023045	0.968124	0.483	0.549	1	EC1	Rest
Amotl1	0.00253482	1.1968	0.485	0.542	1	EC1	Amotl1
Pcbp4	0.00267143	0.41034	0.439	0.503	1	EC1	Pcbp4
Rtl8a	0.00275907	0.824951	0.329	0.279	1	EC1	Rtl8a
Nufip2	0.00302469	0.269537	0.41	0.354	1	EC1	Nufip2
Naaa	0.00305359	1.00871	0.392	0.342	1	EC1	Naaa
Top1	0.00325429	0.734004	0.738	0.797	1	EC1	Top1
Wls	0.00327426	0.919719	0.702	0.785	1	EC1	Wls
Ptp4a1	0.00339353	1.10025	0.716	0.715	1	EC1	Ptp4a1
Psmd11	0.00342535	2.32736	0.624	0.682	1	EC1	Psmd11
Pnn	0.00345039	5.15222	0.609	0.661	1	EC1	Pnn
Npepl1	0.0035807	2.2844	0.45	0.402	1	EC1	Npepl1
Klf6	0.00388	2.9085	0.705	0.693	1	EC1	Klf6
Nmt2	0.00434952	0.465196	0.458	0.401	1	EC1	Nmt2
H2afy	0.00482762	2.97556	0.614	0.694	1	EC1	H2afy
Hnrnpul1	0.00519215	0.870236	0.592	0.553	1	EC1	Hnrnpul1
Hmgb3	0.00559016	4.82251	0.343	0.381	1	EC1	Hmgb3
BC005537	0.0059403	0.519091	0.557	0.529	1	EC1	BC005537
Sec23ip	0.0059848	0.5151	0.335	0.293	1	EC1	Sec23ip
Afap1	0.00757399	2.44985	0.491	0.467	1	EC1	Afap1
Armc1	0.00789281	0.35047	0.429	0.484	1	EC1	Armc1
St7	0.00819853	1.91289	0.426	0.394	1	EC1	St7
Larp7	0.00838901	0.270325	0.498	0.558	1	EC1	Larp7
Nrd1	0.00872604	0.824308	0.375	0.433	1	EC1	Nrd1
Usp34	0.00904552	0.875185	0.515	0.561	1	EC1	Usp34
Gm8797	0.00908515	1.11536	0.496	0.458	1	EC1	Gm8797
Pole3	0.00912873	0.402262	0.485	0.531	1	EC1	Pole3
N4bp2l2	0.00913109	1.57382	0.475	0.534	1	EC1	N4bp2l2
Tubb5	0.00963746	9.91107	0.99	0.993	1	EC1	Tubb5
Rrs1	0.00965365	0.724301	0.249	0.291	1	EC1	Rrs1
Col3a1	0	163.937	1	0.997	0	EC2	Col3a1
Meg3	0	138.937	0.996	0.952	0	EC2	Meg3
Mfap5	0	54.9808	1	0.604	0	EC2	Mfap5
Tmsb4x	0	41.9371	0.999	0.998	0	EC2	Tmsb4x
Pi16	0	25.0255	0.992	0.383	0	EC2	Pi16
Fstl1	0	24.9371	1	0.982	0	EC2	Fstl1
S100a10	0	22.9281	0.997	0.99	0	EC2	S100a10
Nov	0	20.9818	0.993	0.406	0	EC2	Nov
Fbn1	0	15.9463	0.999	0.73	0	EC2	Fbn1
Cd44	0	14.8886	0.911	0.579	0	EC2	Cd44
Cd248	0	14.8522	0.986	0.582	0	EC2	Cd248
Ly6a	0	14.7273	0.99	0.353	0	EC2	Ly6a
S100a11	0	10.0821	1	0.993	0	EC2	S100a11
Ptgs1	0	10.0676	0.895	0.18	0	EC2	Ptgs1
Anxa3	0	10.0635	0.886	0.266	0	EC2	Anxa3
Efemp1	0	9.34977	0.954	0.341	0	EC2	Efemp1
Pamr1	0	8.46956	0.965	0.317	0	EC2	Pamr1
Emilin2	0	8.34	0.98	0.276	0	EC2	Emilin2
Prss23	0	8.24376	0.986	0.371	0	EC2	Prss23
Tnxb	0	7.85631	0.653	0.108	0	EC2	Tnxb
Rras2	0	7.31506	0.864	0.422	0	EC2	Rras2
Ly6c1	0	6.93492	0.781	0.124	0	EC2	Ly6c1
Cd55	0	6.72012	0.916	0.237	0	EC2	Cd55
Axl	0	6.1589	0.939	0.473	0	EC2	Axl
Ccl11	0	5.97427	0.375	0.05	0	EC2	Ccl11
Ctsl	0	5.69889	0.993	0.925	0	EC2	Ctsl
Cd34	0	5.15792	0.995	0.65	0	EC2	Cd34
Htra3	0	5.15666	0.988	0.652	0	EC2	Htra3
Scara5	0	4.85137	0.961	0.258	0	EC2	Scara5
Wnt2	0	4.69979	0.982	0.336	0	EC2	Wnt2
Sema3c	0	4.62387	0.997	0.582	0	EC2	Sema3c
Osr2	0	4.46389	0.941	0.316	0	EC2	Osr2
Osr1	0	4.42288	0.896	0.265	0	EC2	Osr1
Tnfrsf11b	0	4.07066	0.724	0.112	0	EC2	Tnfrsf11b
Nrk	0	3.88852	0.989	0.564	0	EC2	Nrk
Dpysl3	0	3.58421	0.945	0.541	0	EC2	Dpysl3
Srpx	0	3.57239	0.967	0.7	0	EC2	Srpx
Aldh1a31	0	3.14868	0.691	0.133	0	EC2	Aldh1a3
Efhd1	0	3.13241	0.902	0.18	0	EC2	Efhd1
Igfbp6	0	2.9553	0.971	0.337	0	EC2	Igfbp6
St71	0	2.93711	0.771	0.342	0	EC2	St7
Sptbn1	0	2.85912	0.96	0.705	0	EC2	Sptbn1
Zfp385a	0	2.74882	0.721	0.226	0	EC2	Zfp385a
Msr1	0	2.68686	0.296	0.026	0	EC2	Msr1
Gap43	0	2.65727	0.98	0.466	0	EC2	Gap43
Dbn1	0	2.5462	0.932	0.613	0	EC2	Dbn1
Mustn1	0	2.52219	0.424	0.082	0	EC2	Mustn1
Sema3d	0	2.52095	0.78	0.305	0	EC2	Sema3d
Iyd	0	2.48944	0.411	0.034	0	EC2	Iyd
Filip1l1	0	2.47731	0.74	0.27	0	EC2	Filip1l
Lrrn4cl1	0	2.4708	0.644	0.149	0	EC2	Lrrn4cl
Plat	0	2.43944	0.787	0.178	0	EC2	Plat
Cdc42ep2	0	2.36852	0.843	0.299	0	EC2	Cdc42ep2
Col5a3	0	2.21117	0.83	0.214	0	EC2	Col5a3
Zyx	0	2.17036	0.864	0.435	0	EC2	Zyx
Naaa1	0	2.12735	0.786	0.281	0	EC2	Naaa
Rbms31	0	2.09194	0.902	0.509	0	EC2	Rbms3
Dpep1	0	2.04702	0.742	0.263	0	EC2	Dpep1
C1qtnf7	0	1.99803	0.668	0.152	0	EC2	C1qtnf7
Clec3b	0	1.95203	0.999	0.391	0	EC2	Clec3b
Marcks	0	1.84834	0.995	0.965	0	EC2	Marcks
Bmp3	0	1.79304	0.699	0.174	0	EC2	Bmp3
Rab321	0	1.606	0.547	0.127	0	EC2	Rab32
Akr1c14	0	1.36992	0.297	0.032	0	EC2	Akr1c14
Tek1	0	1.3561	0.706	0.162	0	EC2	Tek
Rab7b	0	1.31846	0.574	0.133	0	EC2	Rab7b
Bmp7	0	1.17933	0.709	0.179	0	EC2	Bmp7
Creb5	0	1.17223	0.917	0.306	0	EC2	Creb5
Lims2	0	1.13074	0.402	0.053	0	EC2	Lims2
Arhgap201	0	1.12258	0.818	0.263	0	EC2	Arhgap20
Ncam2	0	1.05354	0.431	0.057	0	EC2	Ncam2
Arsj	0	1.0362	0.429	0.08	0	EC2	Arsj
AW551984	0	0.993749	0.851	0.422	0	EC2	AW551984
Aif1l	0	0.950414	0.395	0.07	0	EC2	Aif1l
Tmem100	0	0.927886	0.959	0.428	0	EC2	Tmem100
Arsi	0	0.84908	0.83	0.33	0	EC2	Arsi
Ntn1	0	0.755025	0.611	0.173	0	EC2	Ntn1
Loxl1	0	0.528295	0.984	0.711	0	EC2	Loxl1
Limch1	0	0.350728	0.622	0.155	0	EC2	Limch1
Kcnj8	0	0.256893	0.688	0.185	0	EC2	Kcnj8
Spon2	7.95854e-307	0.530665	0.615	0.187	2.58271e-302	EC2	Spon2
Stmn4	1.57222e-303	3.56776	0.354	0.058	5.10218e-299	EC2	Stmn4
Dclk1	3.63055e-303	5.25924	0.899	0.548	1.17819e-298	EC2	Dclk1
Tmem371	3.51092e-301	2.63038	0.569	0.167	1.13936e-296	EC2	Tmem37
Galnt16	3.25621e-296	1.31733	0.496	0.124	1.05671e-291	EC2	Galnt16
Smim1	6.94069e-295	2.74759	0.569	0.169	2.25239e-290	EC2	Smim1
Gata6	2.18496e-290	0.913426	0.402	0.078	7.09063e-286	EC2	Gata6
Ahnak2	3.85344e-286	1.33971	0.843	0.396	1.25052e-281	EC2	Ahnak2
Medag	1.22124e-284	1.20873	0.476	0.118	3.96316e-280	EC2	Medag
Ptger4	4.54802e-283	0.935702	0.367	0.068	1.47592e-278	EC2	Ptger4
Heg1	5.00908e-281	2.96128	0.706	0.289	1.62555e-276	EC2	Heg1
Gabra2	8.38151e-280	2.71096	0.264	0.031	2.71997e-275	EC2	Gabra2
Lpl	1.31153e-267	6.4433	0.463	0.123	4.25619e-263	EC2	Lpl
Shox2	9.16831e-267	1.6216	0.563	0.175	2.9753e-262	EC2	Shox2
D630033O11Rik	1.14948e-262	1.02667	0.258	0.033	3.73029e-258	EC2	D630033O11Rik
Nid1	3.0489e-259	2.73713	0.942	0.657	9.89428e-255	EC2	Nid1
Adam23	2.17736e-255	0.939591	0.515	0.151	7.06596e-251	EC2	Adam23
Pcdh191	1.38212e-251	0.936472	0.648	0.242	4.48524e-247	EC2	Pcdh19
Gm9780	4.06498e-249	1.51627	0.61	0.228	1.31917e-244	EC2	Gm9780
Ecm1	8.02421e-244	10.4992	0.522	0.173	2.60402e-239	EC2	Ecm1
Hdac7	7.58095e-242	0.947199	0.545	0.182	2.46017e-237	EC2	Hdac7
Plxdc2	6.09557e-238	2.39981	0.644	0.265	1.97813e-233	EC2	Plxdc2
Rorb	8.55698e-237	0.700783	0.264	0.039	2.77691e-232	EC2	Rorb
Il18	2.14413e-236	0.868724	0.393	0.096	6.95813e-232	EC2	Il18
Stxbp6	9.10255e-235	1.18109	0.378	0.088	2.95396e-230	EC2	Stxbp6
Klf3	6.2748e-229	1.7294	0.836	0.493	2.0363e-224	EC2	Klf3
Vat1	1.76863e-226	1.96001	0.894	0.618	5.73957e-222	EC2	Vat1
Hs6st21	6.31324e-224	1.32295	0.583	0.222	2.04877e-219	EC2	Hs6st2
1700019D03Rik	3.27725e-223	0.768457	0.378	0.091	1.06353e-218	EC2	1700019D03Rik
Ehd2	3.28137e-223	3.41925	0.835	0.492	1.06487e-218	EC2	Ehd2
Rap1a	1.35247e-221	3.90675	0.935	0.722	4.38903e-217	EC2	Rap1a
Luzp2	5.21766e-221	1.22615	0.378	0.091	1.69324e-216	EC2	Luzp2
Efemp2	4.35456e-220	2.71977	0.984	0.862	1.41314e-215	EC2	Efemp2
Kank1	1.12292e-219	0.931358	0.479	0.146	3.6441e-215	EC2	Kank1
Wls1	1.28978e-217	1.13605	0.94	0.757	4.1856e-213	EC2	Wls
Calcrl	2.20274e-216	1.59677	0.322	0.068	7.14834e-212	EC2	Calcrl
Mirg	2.79719e-210	0.92883	0.489	0.159	9.07743e-206	EC2	Mirg
Phactr2	1.83288e-209	6.07819	0.767	0.412	5.94808e-205	EC2	Phactr2
Gfpt2	4.76453e-209	1.22628	0.47	0.151	1.54619e-204	EC2	Gfpt2
Tspan51	3.33647e-206	1.23203	0.671	0.303	1.08275e-201	EC2	Tspan5
Triobp	1.51084e-205	1.75965	0.739	0.383	4.90299e-201	EC2	Triobp
Lhfpl2	3.10265e-204	1.6325	0.682	0.328	1.00687e-199	EC2	Lhfpl2
Lurap1l	1.25023e-202	0.30064	0.616	0.25	4.05723e-198	EC2	Lurap1l
Flywch21	1.02233e-201	1.11507	0.526	0.195	3.31766e-197	EC2	Flywch2
Rnase4	5.57071e-199	9.37109	0.938	0.727	1.80781e-194	EC2	Rnase4
Nrxn1	7.10038e-199	0.460403	0.352	0.087	2.30421e-194	EC2	Nrxn1
Adh7	1.41824e-197	0.66319	0.331	0.078	4.60246e-193	EC2	Adh7
Camk2d	1.62385e-197	0.858578	0.775	0.448	5.26971e-193	EC2	Camk2d
Lgals9	2.85745e-196	1.66922	0.701	0.333	9.27298e-192	EC2	Lgals9
Scara3	1.16635e-195	0.970683	0.845	0.511	3.78505e-191	EC2	Scara3
Ahr	7.33351e-194	2.99147	0.357	0.091	2.37987e-189	EC2	Ahr
Mmp23	8.43431e-192	1.30501	0.903	0.639	2.7371e-187	EC2	Mmp23
Calml4	1.272e-191	0.876011	0.686	0.319	4.12789e-187	EC2	Calml4
Sdcbp	5.51987e-191	1.71892	0.939	0.757	1.79131e-186	EC2	Sdcbp
Nnmt	1.81663e-190	1.34439	0.618	0.274	5.89531e-186	EC2	Nnmt
Adamtsl4	5.32546e-190	0.689109	0.283	0.059	1.72822e-185	EC2	Adamtsl4
B830012L14Rik1	1.57361e-189	1.96764	0.476	0.161	5.10667e-185	EC2	B830012L14Rik
Fam171b	2.5498e-187	0.700334	0.447	0.147	8.2746e-183	EC2	Fam171b
Smtnl2	3.30512e-187	0.609938	0.32	0.075	1.07258e-182	EC2	Smtnl2
Tubb6	4.56098e-186	0.937449	0.924	0.666	1.48013e-181	EC2	Tubb6
Cbln2	9.54803e-186	2.41364	0.376	0.103	3.09853e-181	EC2	Cbln2
Galnt171	2.32385e-185	2.02907	0.455	0.155	7.54134e-181	EC2	Galnt17
Tfpi2	5.17145e-183	1.32985	0.406	0.126	1.67824e-178	EC2	Tfpi2
Plekho2	1.69295e-182	0.759792	0.42	0.134	5.49396e-178	EC2	Plekho2
Add3	1.18634e-181	0.333935	0.845	0.524	3.84991e-177	EC2	Add3
Tmem158	3.17746e-181	2.5846	0.521	0.204	1.03115e-176	EC2	Tmem158
Has1	2.43433e-176	4.70591	0.264	0.054	7.89987e-172	EC2	Has1
Adgrd1	3.29394e-176	0.721526	0.371	0.106	1.06895e-171	EC2	Adgrd1
Ext11	1.16282e-175	0.874369	0.656	0.326	3.77359e-171	EC2	Ext1
Flrt2	2.71816e-175	3.38261	0.714	0.401	8.82097e-171	EC2	Flrt2
Klhl13	8.29378e-174	0.353744	0.543	0.222	2.6915e-169	EC2	Klhl13
Krt19	1.10533e-166	2.98604	0.276	0.063	3.58702e-162	EC2	Krt19
Glipr2	8.83992e-164	0.951227	0.668	0.344	2.86873e-159	EC2	Glipr2
Nhsl1	1.41707e-163	0.879261	0.463	0.174	4.59869e-159	EC2	Nhsl1
Ackr3	3.75509e-163	1.23211	0.585	0.265	1.2186e-158	EC2	Ackr3
S100a13	5.54742e-160	1.37978	0.892	0.683	1.80025e-155	EC2	S100a13
Qpct	1.31016e-159	1.30346	0.556	0.246	4.25173e-155	EC2	Qpct
Arap1	2.45294e-156	0.662997	0.763	0.43	7.96027e-152	EC2	Arap1
B3galnt1	9.21359e-156	1.19471	0.691	0.372	2.98999e-151	EC2	B3galnt1
Man1a	8.76958e-155	0.777264	0.65	0.328	2.8459e-150	EC2	Man1a
Vgll3	1.12794e-154	0.295639	0.38	0.119	3.66039e-150	EC2	Vgll3
Lrrc17	1.22571e-154	2.81331	0.936	0.754	3.97767e-150	EC2	Lrrc17
Kdelc2	2.30448e-153	1.51115	0.783	0.494	7.47849e-149	EC2	Kdelc2
Npepl11	4.5975e-152	1.0001	0.665	0.367	1.49198e-147	EC2	Npepl1
Cmtm3	4.91438e-152	1.85289	0.895	0.669	1.59481e-147	EC2	Cmtm3
Hebp1	1.00156e-149	0.547916	0.701	0.395	3.25028e-145	EC2	Hebp1
Ptp4a11	2.05339e-149	1.01036	0.879	0.691	6.66366e-145	EC2	Ptp4a1
Wbscr17	3.68983e-149	2.12927	0.291	0.079	1.19742e-144	EC2	Wbscr17
Mfhas1	4.43399e-149	0.881792	0.424	0.154	1.43892e-144	EC2	Mfhas1
Cadm3	2.08007e-148	0.659971	0.362	0.116	6.75024e-144	EC2	Cadm3
Mrgprf	6.94991e-147	0.892809	0.59	0.284	2.25539e-142	EC2	Mrgprf
Fam126a	9.00436e-147	3.1583	0.462	0.183	2.92209e-142	EC2	Fam126a
Dhrs7	3.83107e-146	1.81929	0.701	0.399	1.24326e-141	EC2	Dhrs7
Oaf	1.15944e-144	22.8695	0.938	0.787	3.7626e-140	EC2	Oaf
Sash1	1.51807e-144	0.828186	0.587	0.283	4.92645e-140	EC2	Sash1
Clip1	2.12527e-144	1.84784	0.645	0.348	6.89693e-140	EC2	Clip1
Tnfaip6	1.41081e-142	8.54545	0.766	0.475	4.57836e-138	EC2	Tnfaip6
Samd5	1.80716e-141	0.838707	0.434	0.163	5.8646e-137	EC2	Samd5
Rtl1	5.66452e-141	0.393407	0.262	0.065	1.83825e-136	EC2	Rtl1
Ehd1	2.96515e-139	0.40601	0.821	0.568	9.62251e-135	EC2	Ehd1
Dlgap4	7.40253e-139	1.03829	0.73	0.455	2.40227e-134	EC2	Dlgap4
Klf2	3.18546e-138	1.2266	0.917	0.783	1.03374e-133	EC2	Klf2
Fyn	8.03197e-138	0.499532	0.639	0.342	2.60654e-133	EC2	Fyn
Shisa5	3.33323e-136	1.79956	0.914	0.75	1.0817e-131	EC2	Shisa5
Matn2	1.03921e-135	1.68868	0.862	0.637	3.37244e-131	EC2	Matn2
Abcc9	3.39449e-134	0.634778	0.35	0.115	1.10158e-129	EC2	Abcc9
Arhgap29	3.58011e-134	1.18627	0.639	0.352	1.16182e-129	EC2	Arhgap29
Ebf3	5.02141e-134	0.334934	0.412	0.151	1.62955e-129	EC2	Ebf3
Pts	8.00818e-132	1.30894	0.586	0.303	2.59882e-127	EC2	Pts
Slc7a10	2.64106e-131	0.71453	0.331	0.107	8.57076e-127	EC2	Slc7a10
Entpd2	5.36544e-131	0.860707	0.338	0.11	1.74119e-126	EC2	Entpd2
Adam12	1.87105e-130	0.650855	0.485	0.21	6.07193e-126	EC2	Adam12
Wfdc1	3.013e-130	0.440683	0.289	0.082	9.7778e-126	EC2	Wfdc1
Slc38a4	2.71293e-129	1.1758	0.742	0.474	8.80399e-125	EC2	Slc38a4
Afap11	1.35764e-127	0.628366	0.712	0.433	4.40582e-123	EC2	Afap1
Figf	9.94381e-127	13.7503	0.277	0.085	3.22697e-122	EC2	Figf
Mt2	1.13429e-126	0.808804	0.386	0.14	3.68098e-122	EC2	Mt2
Ndrg4	1.00363e-125	0.817484	0.52	0.246	3.25699e-121	EC2	Ndrg4
Spsb1	1.15886e-125	0.46942	0.278	0.08	3.76072e-121	EC2	Spsb1
Sh3kbp1	2.95899e-124	0.779229	0.534	0.258	9.6025e-120	EC2	Sh3kbp1
Itgb3	6.72794e-124	0.574924	0.271	0.078	2.18335e-119	EC2	Itgb3
Chst12	4.00853e-123	2.4528	0.821	0.605	1.30085e-118	EC2	Chst12
Arhgap42	7.04467e-123	0.791453	0.371	0.136	2.28614e-118	EC2	Arhgap42
Wnt11	9.99912e-123	0.571069	0.387	0.146	3.24492e-118	EC2	Wnt11
Sh3bp5	7.13659e-122	0.796322	0.56	0.282	2.31597e-117	EC2	Sh3bp5
Oxct1	9.8455e-122	1.96232	0.902	0.733	3.19506e-117	EC2	Oxct1
Rhoc	1.11638e-119	3.46955	0.973	0.9	3.62288e-115	EC2	Rhoc
Ldb2	2.25183e-119	0.327056	0.493	0.226	7.30765e-115	EC2	Ldb2
Sirpa	8.1899e-118	0.569339	0.376	0.144	2.65779e-113	EC2	Sirpa
Clcn5	2.19354e-116	0.799766	0.44	0.191	7.11848e-112	EC2	Clcn5
Tns1	3.24089e-116	1.11026	0.643	0.374	1.05173e-111	EC2	Tns1
Anpep	8.19859e-116	1.0719	0.612	0.334	2.66061e-111	EC2	Anpep
Snx18	3.07332e-115	1.14685	0.607	0.341	9.97354e-111	EC2	Snx18
Ppp2r2b	6.03335e-113	0.598014	0.294	0.094	1.95794e-108	EC2	Ppp2r2b
Gstm1	6.11799e-113	6.67753	0.669	0.407	1.98541e-108	EC2	Gstm1
Nfe2l2	6.83895e-113	0.350735	0.669	0.398	2.21938e-108	EC2	Nfe2l2
Cep170	1.86004e-112	0.688026	0.598	0.328	6.03621e-108	EC2	Cep170
Adrb2	4.0033e-112	1.10866	0.257	0.075	1.29915e-107	EC2	Adrb2
Fam20c	1.04313e-111	0.580005	0.324	0.114	3.38515e-107	EC2	Fam20c
Tmem106c	2.23856e-110	0.774948	0.502	0.244	7.26458e-106	EC2	Tmem106c
Flnc	4.03102e-110	0.711073	0.506	0.247	1.30815e-105	EC2	Flnc
Daglb	3.53046e-109	0.700301	0.333	0.123	1.14571e-104	EC2	Daglb
AI427809	1.2942e-108	0.429405	0.262	0.08	4.19994e-104	EC2	AI427809
Kctd9	1.43245e-108	0.533092	0.341	0.127	4.64859e-104	EC2	Kctd9
Dact1	5.46288e-108	0.986718	0.531	0.274	1.77281e-103	EC2	Dact1
Dusp101	1.27234e-107	0.727356	0.434	0.193	4.12901e-103	EC2	Dusp10
Zeb1	2.38043e-107	0.635724	0.727	0.47	7.72496e-103	EC2	Zeb1
Tnks1bp1	7.52724e-107	0.612207	0.401	0.169	2.44274e-102	EC2	Tnks1bp1
Disp1	1.304e-103	0.51716	0.34	0.129	4.23175e-99	EC2	Disp1
Cd164	2.81707e-103	0.339069	0.834	0.634	9.14196e-99	EC2	Cd164
Fzd4	3.06097e-103	0.326434	0.288	0.096	9.93345e-99	EC2	Fzd4
1500009L16Rik	1.16605e-102	0.96291	0.406	0.18	3.78407e-98	EC2	1500009L16Rik
Efnb2	2.75527e-102	0.630093	0.417	0.184	8.9414e-98	EC2	Efnb2
Spag9	1.00086e-101	1.82446	0.791	0.576	3.24799e-97	EC2	Spag9
Golim4	3.22757e-100	4.84416	0.851	0.668	1.04741e-95	EC2	Golim4
Sgpp1	6.17303e-100	0.579783	0.446	0.209	2.00327e-95	EC2	Sgpp1
Sntb2	2.58424e-97	1.56063	0.72	0.484	8.38639e-93	EC2	Sntb2
Creld1	6.17286e-97	0.809159	0.411	0.186	2.00322e-92	EC2	Creld1
Cyb5a	7.83199e-97	1.06399	0.915	0.775	2.54164e-92	EC2	Cyb5a
Ubtd2	2.06332e-96	0.810256	0.494	0.251	6.69589e-92	EC2	Ubtd2
Tgfbr2	1.08506e-95	0.735159	0.621	0.38	3.52123e-91	EC2	Tgfbr2
Stx2	1.5784e-95	0.617085	0.44	0.208	5.12222e-91	EC2	Stx2
Dnaja1	1.97992e-95	1.95882	0.971	0.911	6.42525e-91	EC2	Dnaja1
Atf3	7.9291e-93	0.931802	0.533	0.298	2.57315e-88	EC2	Atf3
Pde8a	1.60479e-92	0.374276	0.318	0.122	5.20788e-88	EC2	Pde8a
Nagk	6.09756e-91	3.32502	0.682	0.452	1.97878e-86	EC2	Nagk
Adamtsl5	1.04664e-90	0.898048	0.413	0.192	3.39657e-86	EC2	Adamtsl5
Lamb1	1.36332e-90	1.46073	0.762	0.541	4.42425e-86	EC2	Lamb1
Mturn	4.26931e-89	0.403848	0.312	0.122	1.38547e-84	EC2	Mturn
Fbxo4	9.41983e-89	0.596341	0.43	0.207	3.05692e-84	EC2	Fbxo4
Adamts15	1.44292e-88	0.341194	0.275	0.098	4.68255e-84	EC2	Adamts15
Ppp1r2	3.48241e-88	1.27881	0.823	0.64	1.13011e-83	EC2	Ppp1r2
Mfge8	3.77096e-88	2.13253	0.845	0.674	1.22375e-83	EC2	Mfge8
Jpt1	1.75768e-86	2.55861	0.549	0.319	5.70402e-82	EC2	Jpt1
Rsrc1	2.85011e-86	0.743696	0.668	0.435	9.24916e-82	EC2	Rsrc1
Ccdc12	4.25292e-86	2.6097	0.788	0.601	1.38016e-81	EC2	Ccdc12
Aig1	4.43394e-86	0.503628	0.426	0.206	1.4389e-81	EC2	Aig1
Gstm2	1.59767e-85	0.773503	0.634	0.407	5.18477e-81	EC2	Gstm2
Vegfd	1.66417e-85	0.647185	0.335	0.138	5.40057e-81	EC2	Vegfd
Sh3d19	2.28376e-85	0.649669	0.528	0.292	7.41124e-81	EC2	Sh3d19
Fam198b	5.69751e-85	0.823518	0.296	0.116	1.84896e-80	EC2	Fam198b
Ap2a21	7.17511e-85	0.523762	0.882	0.727	2.32847e-80	EC2	Ap2a2
Pea15a	7.14398e-84	0.429049	0.688	0.459	2.31837e-79	EC2	Pea15a
Lasp1	3.33979e-83	0.895999	0.694	0.479	1.08383e-78	EC2	Lasp1
B2m	3.35436e-83	2.92794	0.992	0.959	1.08856e-78	EC2	B2m
Gngt2	4.10116e-83	0.611013	0.395	0.188	1.33091e-78	EC2	Gngt2
Cmip	7.89638e-83	0.723529	0.476	0.253	2.56253e-78	EC2	Cmip
Tro	9.96735e-83	0.843386	0.468	0.245	3.2346e-78	EC2	Tro
Pbxip1	1.02031e-82	0.518921	0.594	0.355	3.31112e-78	EC2	Pbxip1
Plekhg1	1.06775e-82	0.479511	0.345	0.15	3.46507e-78	EC2	Plekhg1
Dsel	4.68052e-82	0.635444	0.495	0.274	1.51892e-77	EC2	Dsel
Lima1	1.31581e-81	5.35058	0.787	0.598	4.27007e-77	EC2	Lima1
Pde5a	2.02951e-81	0.359928	0.259	0.094	6.58618e-77	EC2	Pde5a
Capza2	5.84586e-81	2.37209	0.936	0.852	1.8971e-76	EC2	Capza2
Gas7	7.26186e-81	8.14809	0.378	0.178	2.35662e-76	EC2	Gas7
Slc31a2	1.46334e-80	1.04304	0.548	0.323	4.74883e-76	EC2	Slc31a2
Mcc	1.64242e-80	0.536634	0.344	0.152	5.32997e-76	EC2	Mcc
Fam102b	1.91232e-80	0.679014	0.407	0.199	6.20585e-76	EC2	Fam102b
Hspb8	5.81134e-80	0.534446	0.26	0.096	1.8859e-75	EC2	Hspb8
Akap7	8.63168e-80	0.496204	0.382	0.181	2.80115e-75	EC2	Akap7
Ppp1r9a	2.86721e-79	0.393123	0.292	0.116	9.30467e-75	EC2	Ppp1r9a
Myadm	1.42981e-78	0.840572	0.76	0.556	4.64002e-74	EC2	Myadm
Cotl1	3.10093e-78	0.491337	0.728	0.518	1.00631e-73	EC2	Cotl1
Adam15	2.76995e-77	0.659615	0.675	0.457	8.98904e-73	EC2	Adam15
Dcbld2	1.19443e-76	0.598209	0.365	0.171	3.87617e-72	EC2	Dcbld2
Arsa	3.59659e-76	0.505035	0.38	0.183	1.16716e-71	EC2	Arsa
Epb41l3	4.15525e-76	0.751287	0.701	0.491	1.34846e-71	EC2	Epb41l3
Acvrl1	8.06477e-76	0.482439	0.409	0.205	2.61718e-71	EC2	Acvrl1
Tbc1d23	4.1483e-75	0.825433	0.461	0.252	1.34621e-70	EC2	Tbc1d23
Prr13	4.42793e-75	2.60849	0.713	0.523	1.43695e-70	EC2	Prr13
Dcaf12l1	1.72311e-73	0.523295	0.27	0.108	5.59183e-69	EC2	Dcaf12l1
Agfg1	2.6544e-73	0.535098	0.479	0.266	8.61404e-69	EC2	Agfg1
Il3ra	5.188e-73	0.445952	0.315	0.139	1.68361e-68	EC2	Il3ra
Nectin21	7.28385e-73	0.773925	0.357	0.166	2.36375e-68	EC2	Nectin2
Rell1	1.66353e-72	0.735296	0.408	0.211	5.3985e-68	EC2	Rell1
Ppp1r14b	2.26225e-72	1.88914	0.79	0.598	7.34144e-68	EC2	Ppp1r14b
Cers6	3.82282e-72	0.364459	0.309	0.134	1.24058e-67	EC2	Cers6
Dst	1.21874e-71	0.805693	0.47	0.261	3.95505e-67	EC2	Dst
Lzts2	1.7411e-71	0.957218	0.706	0.503	5.65021e-67	EC2	Lzts2
Armcx3	6.09953e-71	0.624425	0.838	0.668	1.97942e-66	EC2	Armcx3
Arpc1b	5.50157e-70	4.1865	0.987	0.955	1.78537e-65	EC2	Arpc1b
Man2a1	6.95176e-70	0.961997	0.548	0.334	2.25598e-65	EC2	Man2a1
Fndc3b	9.59684e-70	0.400263	0.777	0.591	3.11437e-65	EC2	Fndc3b
Tgfbr3	1.0267e-67	0.609569	0.421	0.223	3.33186e-63	EC2	Tgfbr3
Lefty1	3.20508e-67	0.416905	0.303	0.135	1.04011e-62	EC2	Lefty1
Armcx2	3.22412e-67	0.508856	0.767	0.583	1.04629e-62	EC2	Armcx2
Rspo2	1.51161e-66	0.404372	0.256	0.102	4.90547e-62	EC2	Rspo2
Tcn2	1.82239e-66	0.734109	0.583	0.372	5.91402e-62	EC2	Tcn2
Rtl8a1	7.72902e-66	0.415238	0.453	0.257	2.50822e-61	EC2	Rtl8a
Rab11fip2	1.34802e-65	0.516829	0.502	0.301	4.37461e-61	EC2	Rab11fip2
Kcne1l	1.44845e-65	0.348902	0.28	0.118	4.70051e-61	EC2	Kcne1l
Limk1	1.61026e-65	0.423782	0.288	0.127	5.22562e-61	EC2	Limk1
Chmp3	2.70526e-65	1.95189	0.73	0.562	8.77911e-61	EC2	Chmp3
Arhgap21	8.71408e-65	0.310399	0.305	0.138	2.82789e-60	EC2	Arhgap21
Pxdn	1.05645e-64	0.579431	0.588	0.38	3.42838e-60	EC2	Pxdn
Cdk14	1.39201e-64	0.445211	0.504	0.297	4.51735e-60	EC2	Cdk14
Fam122b	1.76082e-64	0.353395	0.273	0.117	5.71422e-60	EC2	Fam122b
Rala	5.08295e-64	3.26914	0.788	0.628	1.64952e-59	EC2	Rala
Palm	5.59159e-64	0.443403	0.498	0.296	1.81458e-59	EC2	Palm
Aida	7.4188e-64	0.735092	0.659	0.465	2.40755e-59	EC2	Aida
Glt8d2	7.53272e-64	0.842159	0.598	0.394	2.44452e-59	EC2	Glt8d2
Phldb1	7.81306e-64	0.61068	0.433	0.24	2.5355e-59	EC2	Phldb1
As3mt	2.05771e-63	0.321605	0.257	0.106	6.67769e-59	EC2	As3mt
Pear1	2.25844e-63	0.265693	0.252	0.102	7.32909e-59	EC2	Pear1
Fer	4.17672e-63	0.405927	0.401	0.211	1.35543e-58	EC2	Fer
Fam111a	8.70634e-63	1.23006	0.558	0.347	2.82538e-58	EC2	Fam111a
Arsb	1.04075e-62	0.370512	0.273	0.118	3.37745e-58	EC2	Arsb
Dusp1	2.83929e-62	0.84602	0.742	0.563	9.21406e-58	EC2	Dusp1
Atf5	1.12535e-61	1.56318	0.471	0.281	3.65199e-57	EC2	Atf5
Dtnbp1	1.79451e-61	1.34108	0.543	0.35	5.82356e-57	EC2	Dtnbp1
Srxn1	2.65883e-61	0.336605	0.252	0.105	8.62844e-57	EC2	Srxn1
Slc1a5	3.56172e-61	0.623801	0.496	0.296	1.15585e-56	EC2	Slc1a5
Tnfsf12	1.49795e-60	0.374709	0.38	0.197	4.86116e-56	EC2	Tnfsf12
Vapb	3.7824e-60	1.12448	0.8	0.653	1.22747e-55	EC2	Vapb
Ppm1a	4.8527e-60	0.695541	0.519	0.326	1.5748e-55	EC2	Ppm1a
Coq10b	7.6355e-60	0.759277	0.468	0.279	2.47787e-55	EC2	Coq10b
Dtx2	1.46398e-59	0.445734	0.334	0.164	4.7509e-55	EC2	Dtx2
Sipa1	1.60221e-59	0.466173	0.335	0.167	5.1995e-55	EC2	Sipa1
Rhbdf1	1.6838e-59	0.595694	0.465	0.275	5.46427e-55	EC2	Rhbdf1
Slit2	1.97939e-59	0.360062	0.391	0.199	6.42351e-55	EC2	Slit2
Gm9844	2.52903e-59	1.1033	0.646	0.462	8.20722e-55	EC2	Gm9844
Paxx	3.01874e-59	0.40938	0.314	0.149	9.79643e-55	EC2	Paxx
Dlc1	3.79645e-59	0.798673	0.623	0.425	1.23202e-54	EC2	Dlc1
Gan	1.24237e-58	0.426844	0.327	0.162	4.03174e-54	EC2	Gan
Iqsec11	2.34357e-58	0.411293	0.431	0.242	7.60535e-54	EC2	Iqsec1
Plscr3	5.86704e-58	0.773151	0.686	0.509	1.90397e-53	EC2	Plscr3
Wsb1	9.10777e-58	1.01896	0.759	0.604	2.95565e-53	EC2	Wsb1
Sh3gl1	2.04855e-57	0.306363	0.775	0.636	6.64796e-53	EC2	Sh3gl1
Cxxc5	5.85869e-57	0.830516	0.377	0.205	1.90126e-52	EC2	Cxxc5
Tanc2	9.08471e-57	0.996895	0.367	0.193	2.94817e-52	EC2	Tanc2
Chrd	1.59189e-56	0.318512	0.264	0.118	5.16601e-52	EC2	Chrd
Calu1	1.70061e-56	0.832481	0.985	0.938	5.51881e-52	EC2	Calu
Rtl8b	3.1093e-56	0.639748	0.354	0.186	1.00903e-51	EC2	Rtl8b
Uap1	4.95018e-56	1.42673	0.731	0.559	1.60643e-51	EC2	Uap1
Serpinb6a	2.32573e-55	3.98062	0.821	0.687	7.54745e-51	EC2	Serpinb6a
Ablim1	8.47022e-55	0.478437	0.309	0.152	2.74875e-50	EC2	Ablim1
Mcrip1	1.38753e-54	1.9507	0.56	0.366	4.50282e-50	EC2	Mcrip1
Sgce	2.08967e-54	0.735279	0.744	0.584	6.78138e-50	EC2	Sgce
Fam20a	1.22873e-53	0.46853	0.303	0.149	3.98748e-49	EC2	Fam20a
Smim27	1.59216e-53	0.409994	0.382	0.208	5.16687e-49	EC2	Smim27
Abl1	1.86699e-53	0.403113	0.449	0.268	6.05877e-49	EC2	Abl1
Rab8b	4.55746e-53	0.404052	0.286	0.139	1.47899e-48	EC2	Rab8b
Hpcal1	5.36641e-53	0.401158	0.643	0.457	1.74151e-48	EC2	Hpcal1
Hebp2	5.8016e-53	0.561725	0.498	0.313	1.88273e-48	EC2	Hebp2
Csnk1e	1.85863e-52	1.05398	0.539	0.357	6.03161e-48	EC2	Csnk1e
Farp1	2.22419e-52	0.439693	0.389	0.218	7.21794e-48	EC2	Farp1
Sfxn3	2.67266e-52	0.37283	0.573	0.387	8.67332e-48	EC2	Sfxn3
Cggbp1	3.43921e-52	0.482744	0.737	0.586	1.11609e-47	EC2	Cggbp1
Ftl1-ps1	3.68955e-52	0.58442	0.356	0.19	1.19733e-47	EC2	Ftl1-ps1
Psd3	1.81054e-51	0.363607	0.333	0.175	5.87555e-47	EC2	Psd3
Ptprg	3.41485e-51	0.404648	0.311	0.158	1.10819e-46	EC2	Ptprg
Cebpd	4.89116e-51	2.78711	0.378	0.21	1.58728e-46	EC2	Cebpd
Me1	1.27909e-50	0.442268	0.394	0.223	4.15089e-46	EC2	Me1
Hacd4	1.28067e-50	0.312522	0.453	0.269	4.15604e-46	EC2	Hacd4
Scpep1	1.90805e-50	0.504896	0.665	0.488	6.192e-46	EC2	Scpep1
Samd4b	2.22821e-50	0.559957	0.436	0.261	7.23099e-46	EC2	Samd4b
Capns1	3.5618e-50	0.954012	0.978	0.944	1.15587e-45	EC2	Capns1
Yipf4	7.34987e-50	1.5171	0.87	0.758	2.38518e-45	EC2	Yipf4
Zfp948	1.37532e-49	0.311681	0.436	0.261	4.4632e-45	EC2	Zfp948
Zfyve16	3.62994e-49	0.447349	0.344	0.187	1.17799e-44	EC2	Zfyve16
Nucb1	8.02816e-49	0.91344	0.924	0.833	2.6053e-44	EC2	Nucb1
Cast	1.7567e-48	1.99964	0.589	0.412	5.70084e-44	EC2	Cast
Daam1	2.17844e-48	0.519169	0.254	0.12	7.06946e-44	EC2	Daam1
Mrpl33	2.58592e-48	3.26409	0.961	0.924	8.39184e-44	EC2	Mrpl33
Pycard	5.1634e-48	0.666064	0.725	0.547	1.67563e-43	EC2	Pycard
Kctd17	5.27845e-48	0.330762	0.275	0.135	1.71296e-43	EC2	Kctd17
Xpnpep1	5.51218e-48	0.655095	0.693	0.537	1.78881e-43	EC2	Xpnpep1
Ghr	9.34698e-48	0.288908	0.559	0.375	3.03328e-43	EC2	Ghr
Ccm2	1.04007e-47	0.48043	0.637	0.467	3.37524e-43	EC2	Ccm2
Kank2	1.0924e-47	0.594658	0.464	0.293	3.54506e-43	EC2	Kank2
Srgap1	1.12728e-47	0.399462	0.293	0.148	3.65824e-43	EC2	Srgap1
Gm2000	1.30673e-47	8.15231	0.959	0.954	4.24061e-43	EC2	Gm2000
Trir1	1.20384e-46	0.755678	0.488	0.31	3.90671e-42	EC2	Trir
Pttg1ip	1.20829e-46	0.663504	0.776	0.644	3.92113e-42	EC2	Pttg1ip
Ptpra	1.53329e-46	0.641227	0.697	0.529	4.97582e-42	EC2	Ptpra
Prmt2	2.61632e-46	0.451143	0.526	0.348	8.49049e-42	EC2	Prmt2
Lamc1	2.83064e-46	0.450546	0.498	0.325	9.18599e-42	EC2	Lamc1
Tacc2	2.99739e-46	0.390764	0.459	0.286	9.72712e-42	EC2	Tacc2
2020-09-08	3.34096e-46	0.570019	0.493	0.324	1.08421e-41	EC2	2020-09-08
Dnajc10	4.28183e-46	0.874266	0.66	0.503	1.38954e-41	EC2	Dnajc10
Ror1	6.89425e-46	0.381313	0.253	0.12	2.23732e-41	EC2	Ror1
Sec14l1	1.0776e-45	0.434677	0.397	0.235	3.49704e-41	EC2	Sec14l1
Krcc1	1.33814e-45	2.59407	0.709	0.558	4.34252e-41	EC2	Krcc1
Irs1	1.89436e-45	0.926246	0.452	0.283	6.14757e-41	EC2	Irs1
Stk38	4.67774e-45	2.04623	0.523	0.35	1.51802e-40	EC2	Stk38
Sat1	1.53394e-44	9.41664	0.563	0.4	4.97793e-40	EC2	Sat1
Tcf251	3.25326e-44	2.3311	0.902	0.823	1.05575e-39	EC2	Tcf25
Abcg2	7.40732e-44	0.411951	0.408	0.25	2.40382e-39	EC2	Abcg2
Ugcg	7.66655e-44	0.370368	0.313	0.17	2.48795e-39	EC2	Ugcg
Ybx3	1.58984e-43	1.9184	0.63	0.476	5.15934e-39	EC2	Ybx3
Sqstm1	3.38024e-43	0.395122	0.686	0.536	1.09696e-38	EC2	Sqstm1
Blvrb	8.19308e-43	1.23993	0.774	0.64	2.65882e-38	EC2	Blvrb
Mkl21	2.00064e-42	0.55721	0.334	0.188	6.49249e-38	EC2	Mkl2
Hic1	2.67551e-42	0.481583	0.343	0.191	8.68257e-38	EC2	Hic1
Stam	2.80493e-42	0.324227	0.326	0.18	9.10257e-38	EC2	Stam
Csgalnact2	5.32593e-42	0.410479	0.419	0.261	1.72837e-37	EC2	Csgalnact2
Fez1	1.04678e-41	0.396274	0.389	0.233	3.39701e-37	EC2	Fez1
BC0055371	1.78262e-41	0.922423	0.672	0.51	5.78497e-37	EC2	BC005537
Pja2	2.51989e-41	0.385561	0.685	0.538	8.17755e-37	EC2	Pja2
Vwa5a	3.74826e-41	0.267108	0.361	0.21	1.21638e-36	EC2	Vwa5a
Nucb2	5.97882e-41	1.09798	0.825	0.708	1.94025e-36	EC2	Nucb2
Hdgfl3	2.84949e-40	0.412709	0.308	0.17	9.24716e-36	EC2	Hdgfl3
Ppp1r10	3.36739e-40	0.468275	0.49	0.338	1.09279e-35	EC2	Ppp1r10
Zdhhc3	6.08343e-40	0.574264	0.539	0.375	1.9742e-35	EC2	Zdhhc3
Hspa1a	8.50768e-40	2.34864	0.274	0.145	2.76091e-35	EC2	Hspa1a
Fez2	1.42574e-39	0.557785	0.519	0.358	4.62682e-35	EC2	Fez2
Cenpx	1.67819e-39	0.31552	0.426	0.266	5.44605e-35	EC2	Cenpx
Tnfaip1	1.82814e-39	0.558461	0.656	0.512	5.93267e-35	EC2	Tnfaip1
Vps281	4.50041e-39	0.606631	0.415	0.256	1.46047e-34	EC2	Vps28
Cnot2	5.75474e-39	0.483433	0.584	0.423	1.86753e-34	EC2	Cnot2
Pgm2	7.54982e-39	0.401458	0.47	0.31	2.45007e-34	EC2	Pgm2
Mxra7	1.12362e-38	0.397549	0.553	0.399	3.64636e-34	EC2	Mxra7
Ccdc102a	2.04355e-38	0.522222	0.59	0.432	6.63173e-34	EC2	Ccdc102a
Nufip21	2.36199e-38	0.452472	0.492	0.338	7.66513e-34	EC2	Nufip2
Tm2d1	2.51805e-38	0.407367	0.785	0.653	8.17157e-34	EC2	Tm2d1
Ppp1r15b	3.4032e-38	0.536512	0.374	0.23	1.10441e-33	EC2	Ppp1r15b
Rbms1	6.891e-38	0.806407	0.864	0.759	2.23627e-33	EC2	Rbms1
Pgd	7.20245e-38	0.4285	0.487	0.327	2.33734e-33	EC2	Pgd
Ngf	8.84083e-38	0.368326	0.301	0.166	2.86903e-33	EC2	Ngf
Tsc22d2	9.17529e-38	0.989689	0.555	0.402	2.97757e-33	EC2	Tsc22d2
Mast4	1.06873e-37	0.588128	0.469	0.318	3.46824e-33	EC2	Mast4
Fam114a1	1.75803e-37	0.439807	0.809	0.675	5.70516e-33	EC2	Fam114a1
Add1	2.2157e-37	0.637944	0.665	0.515	7.19039e-33	EC2	Add1
Cnrip1	5.81804e-37	0.615124	0.52	0.364	1.88807e-32	EC2	Cnrip1
Bad	1.00057e-36	0.860567	0.796	0.679	3.24705e-32	EC2	Bad
Cgrrf1	1.58321e-36	0.278188	0.312	0.179	5.13783e-32	EC2	Cgrrf1
Ndel1	2.27953e-36	0.416966	0.764	0.622	7.39752e-32	EC2	Ndel1
Washc3	2.79117e-36	0.394769	0.31	0.175	9.0579e-32	EC2	Washc3
Snx9	3.58653e-36	0.345748	0.408	0.26	1.1639e-31	EC2	Snx9
Ehbp1	2.10966e-35	0.269328	0.306	0.177	6.84628e-31	EC2	Ehbp1
Rtn3	2.60398e-35	0.338324	0.823	0.702	8.45044e-31	EC2	Rtn3
St3gal2	2.86974e-35	0.476228	0.391	0.247	9.3129e-31	EC2	St3gal2
Tbc1d12	3.37979e-35	0.343022	0.284	0.159	1.09681e-30	EC2	Tbc1d12
Sepp1	4.58664e-35	1.87315	0.354	0.241	1.48846e-30	EC2	Sepp1
Creb3	5.13389e-35	0.430796	0.663	0.526	1.66605e-30	EC2	Creb3
Zcchc5	5.21251e-35	2.30752	0.359	0.26	1.69156e-30	EC2	Zcchc5
Rassf1	6.45791e-35	1.36448	0.736	0.617	2.09572e-30	EC2	Rassf1
Eloa	6.99001e-35	0.553525	0.318	0.185	2.2684e-30	EC2	Eloa
Cnpy4	7.59456e-35	0.947059	0.502	0.362	2.46459e-30	EC2	Cnpy4
Tapbp	1.1532e-34	0.79109	0.543	0.391	3.74236e-30	EC2	Tapbp
Ugp2	1.39634e-34	4.67846	0.729	0.603	4.5314e-30	EC2	Ugp2
Rnf144a	2.82995e-34	0.421545	0.425	0.28	9.18375e-30	EC2	Rnf144a
Cltb	3.26752e-34	1.23778	0.643	0.515	1.06038e-29	EC2	Cltb
Stim21	3.65995e-34	0.291705	0.328	0.196	1.18773e-29	EC2	Stim2
Lysmd3	3.80851e-34	1.63246	0.515	0.374	1.23594e-29	EC2	Lysmd3
Gns	5.08733e-34	0.627807	0.451	0.306	1.65094e-29	EC2	Gns
Numbl	7.47914e-34	0.279197	0.568	0.415	2.42713e-29	EC2	Numbl
Rab4a	1.09038e-33	0.501371	0.405	0.269	3.5385e-29	EC2	Rab4a
Ehd4	1.37224e-33	0.358463	0.324	0.194	4.45318e-29	EC2	Ehd4
Dusp22	1.64403e-33	0.330324	0.322	0.192	5.33519e-29	EC2	Dusp22
Bckdhb	2.15577e-33	0.407582	0.346	0.214	6.99591e-29	EC2	Bckdhb
Prr5	4.35729e-33	0.308375	0.483	0.336	1.41403e-28	EC2	Prr5
Acot9	6.6552e-33	0.519502	0.539	0.393	2.15975e-28	EC2	Acot9
Lrp10	7.8785e-33	0.335699	0.495	0.35	2.55673e-28	EC2	Lrp10
Tmem64	7.95615e-33	0.311282	0.387	0.248	2.58193e-28	EC2	Tmem64
Atp13a3	1.05865e-32	0.37082	0.273	0.155	3.43552e-28	EC2	Atp13a3
Rab22a	1.50015e-32	0.569934	0.564	0.424	4.86829e-28	EC2	Rab22a
Hspa5	1.56942e-32	23.7983	0.996	0.979	5.09308e-28	EC2	Hspa5
Rnf145	1.68503e-32	0.564471	0.483	0.338	5.46827e-28	EC2	Rnf145
Pafah1b1	2.7122e-32	0.948308	0.867	0.797	8.80164e-28	EC2	Pafah1b1
Svep1	2.91617e-32	0.474733	0.447	0.305	9.46357e-28	EC2	Svep1
Antxr1	4.4762e-32	0.390831	0.574	0.441	1.45262e-27	EC2	Antxr1
Utp11	8.36552e-32	0.277452	0.412	0.266	2.71478e-27	EC2	Utp11
Fam213b	1.29415e-31	0.342761	0.393	0.257	4.19979e-27	EC2	Fam213b
Gsdmd	1.29674e-31	0.317321	0.299	0.176	4.20818e-27	EC2	Gsdmd
Lpp	1.52163e-31	1.06643	0.648	0.519	4.93798e-27	EC2	Lpp
Tlcd2	2.14799e-31	0.396082	0.43	0.292	6.97067e-27	EC2	Tlcd2
Itga5	4.66426e-31	0.442687	0.401	0.264	1.51365e-26	EC2	Itga5
Lama2	5.38144e-31	0.32689	0.365	0.233	1.74638e-26	EC2	Lama2
Ubxn1	7.13868e-31	0.625263	0.832	0.733	2.31665e-26	EC2	Ubxn1
B4galt2	7.22793e-31	0.353386	0.341	0.214	2.34561e-26	EC2	B4galt2
Cpne2	1.03881e-30	0.305063	0.26	0.147	3.37115e-26	EC2	Cpne2
Hif1a	1.05921e-30	0.36797	0.599	0.473	3.43734e-26	EC2	Hif1a
Tmed4	1.3024e-30	0.369064	0.623	0.491	4.22655e-26	EC2	Tmed4
Twf1	1.45342e-30	0.678882	0.533	0.39	4.71663e-26	EC2	Twf1
Rgl1	3.47019e-30	0.368634	0.335	0.208	1.12615e-25	EC2	Rgl1
Rapgef1	3.78832e-30	0.265956	0.27	0.155	1.22939e-25	EC2	Rapgef1
Acer3	4.5501e-30	0.285494	0.331	0.208	1.4766e-25	EC2	Acer3
Bnip3l	8.44329e-30	1.81755	0.877	0.808	2.74002e-25	EC2	Bnip3l
Fuca2	2.15751e-29	0.329372	0.374	0.242	7.00154e-25	EC2	Fuca2
Il10rb	2.90707e-29	0.390762	0.366	0.239	9.43401e-25	EC2	Il10rb
Dennd2a	3.10925e-29	0.257973	0.273	0.159	1.00901e-24	EC2	Dennd2a
Adam10	3.26395e-29	0.455358	0.502	0.364	1.05922e-24	EC2	Adam10
Appbp2	3.7888e-29	0.332518	0.594	0.46	1.22954e-24	EC2	Appbp2
Kdm7a	5.61831e-29	0.37738	0.319	0.199	1.82325e-24	EC2	Kdm7a
Trip10	6.4671e-29	0.368742	0.316	0.198	2.0987e-24	EC2	Trip10
Klc1	1.1164e-28	0.428081	0.573	0.439	3.62295e-24	EC2	Klc1
Ccz1	1.20357e-28	3.61483	0.531	0.409	3.90584e-24	EC2	Ccz1
Jak1	2.02814e-28	0.777967	0.592	0.472	6.58173e-24	EC2	Jak1
Lama4	2.15564e-28	3.29456	0.556	0.417	6.99547e-24	EC2	Lama4
Tmem107	8.5771e-28	0.741908	0.716	0.584	2.78344e-23	EC2	Tmem107
Naxd	1.49188e-27	0.313132	0.301	0.185	4.84146e-23	EC2	Naxd
Tox	1.72892e-27	0.377215	0.323	0.203	5.61071e-23	EC2	Tox
Htra2	2.47525e-27	0.473911	0.593	0.464	8.03269e-23	EC2	Htra2
S1pr2	2.78619e-27	0.286188	0.516	0.38	9.04174e-23	EC2	S1pr2
Hsd17b11	2.98522e-27	0.251495	0.321	0.203	9.68762e-23	EC2	Hsd17b11
Spty2d11	3.10983e-27	0.36689	0.542	0.417	1.0092e-22	EC2	Spty2d1
Eif3j2	3.35293e-27	0.261935	0.284	0.171	1.08809e-22	EC2	Eif3j2
Pik3r2	3.88479e-27	0.650804	0.442	0.319	1.26069e-22	EC2	Pik3r2
Carhsp1	3.97064e-27	0.480882	0.589	0.451	1.28855e-22	EC2	Carhsp1
Ascc3	5.09478e-27	0.338551	0.455	0.327	1.65336e-22	EC2	Ascc3
Cdc42ep5	5.1865e-27	0.815808	0.725	0.619	1.68312e-22	EC2	Cdc42ep5
Rhog	6.3149e-27	0.38926	0.359	0.24	2.04931e-22	EC2	Rhog
Tmem43	1.07345e-26	0.553834	0.528	0.398	3.48355e-22	EC2	Tmem43
Pxn	2.41494e-26	0.26191	0.297	0.185	7.83698e-22	EC2	Pxn
Efs	2.7093e-26	0.347447	0.474	0.344	8.79222e-22	EC2	Efs
Kras	3.42687e-26	0.656895	0.619	0.505	1.11209e-21	EC2	Kras
Nsd3	4.59994e-26	0.654641	0.324	0.204	1.49277e-21	EC2	Nsd3
Tmem9	6.65656e-26	3.78713	0.802	0.701	2.16019e-21	EC2	Tmem9
Herpud2	7.33232e-26	0.521762	0.463	0.338	2.37948e-21	EC2	Herpud2
Tfdp1	7.71433e-26	0.774126	0.316	0.2	2.50345e-21	EC2	Tfdp1
Cdk16	8.36373e-26	0.335291	0.666	0.539	2.7142e-21	EC2	Cdk16
Zmiz1	8.3844e-26	0.268723	0.498	0.371	2.72091e-21	EC2	Zmiz1
Pink1	1.14515e-25	0.285395	0.475	0.348	3.71625e-21	EC2	Pink1
Tmed5	1.51348e-25	0.360798	0.622	0.49	4.91153e-21	EC2	Tmed5
Fosl2	1.62654e-25	0.396711	0.4	0.276	5.27844e-21	EC2	Fosl2
Mea1	2.82284e-25	0.261986	0.651	0.538	9.16067e-21	EC2	Mea1
Eng	2.8466e-25	0.288794	0.399	0.275	9.23779e-21	EC2	Eng
Chmp5	4.88726e-25	0.579266	0.776	0.67	1.58601e-20	EC2	Chmp5
Gamt	7.11456e-25	0.479397	0.582	0.451	2.30882e-20	EC2	Gamt
Il17rc	1.00118e-24	0.397564	0.351	0.235	3.24902e-20	EC2	Il17rc
Stx4a	1.09503e-24	0.455983	0.671	0.561	3.55358e-20	EC2	Stx4a
Elof1	1.48705e-24	0.461664	0.747	0.639	4.82576e-20	EC2	Elof1
2020-03-02	1.63939e-24	0.470281	0.485	0.365	5.32014e-20	EC2	2020-03-02
Cbx6	1.85423e-24	0.634675	0.6	0.478	6.01735e-20	EC2	Cbx6
Fam172a	1.98482e-24	0.314574	0.465	0.342	6.44113e-20	EC2	Fam172a
Inpp1	2.44712e-24	0.29959	0.344	0.229	7.94139e-20	EC2	Inpp1
Knop1	3.34287e-24	2.05407	0.682	0.572	1.08483e-19	EC2	Knop1
Syap1	3.6992e-24	0.456302	0.466	0.347	1.20046e-19	EC2	Syap1
Fam129a	8.39739e-24	0.251033	0.28	0.175	2.72512e-19	EC2	Fam129a
Ifrd1	1.2091e-23	1.4424	0.519	0.42	3.92376e-19	EC2	Ifrd1
Adprh	1.55522e-23	0.323851	0.731	0.623	5.04702e-19	EC2	Adprh
Fam208a	3.19761e-23	0.341078	0.372	0.257	1.03769e-18	EC2	Fam208a
Wasf2	1.31617e-22	0.373366	0.716	0.612	4.27125e-18	EC2	Wasf2
Atp9a	1.62013e-22	0.25523	0.331	0.223	5.25765e-18	EC2	Atp9a
Atp6v0d1	2.55277e-22	1.16137	0.747	0.635	8.28424e-18	EC2	Atp6v0d1
Gas2l1	2.73648e-22	0.292727	0.294	0.192	8.88043e-18	EC2	Gas2l1
Zfp383	2.80776e-22	0.272831	0.298	0.194	9.11174e-18	EC2	Zfp383
Hook3	2.89686e-22	0.308916	0.591	0.474	9.4009e-18	EC2	Hook3
Bag3	3.72198e-22	0.631424	0.401	0.29	1.20786e-17	EC2	Bag3
Nsmce3	1.12556e-21	0.341355	0.26	0.161	3.65266e-17	EC2	Nsmce3
Rpl36a-ps1	1.20007e-21	0.376276	0.286	0.185	3.89445e-17	EC2	Rpl36a-ps1
Stx12	1.44414e-21	0.352705	0.62	0.507	4.68651e-17	EC2	Stx12
Stard3nl	1.45735e-21	0.34708	0.663	0.56	4.72939e-17	EC2	Stard3nl
Nipsnap3b	3.01676e-21	0.396248	0.485	0.371	9.78998e-17	EC2	Nipsnap3b
Gm47283	3.12738e-21	0.975849	0.305	0.199	1.0149e-16	EC2	Gm47283
Pafah1b2	4.27122e-21	0.55257	0.752	0.661	1.3861e-16	EC2	Pafah1b2
Nck1	5.32997e-21	0.443363	0.484	0.374	1.72968e-16	EC2	Nck1
Cldnd1	3.75948e-20	0.356929	0.819	0.746	1.22003e-15	EC2	Cldnd1
Ralb	8.84367e-20	0.344295	0.471	0.356	2.86995e-15	EC2	Ralb
Dusp23	1.09378e-19	0.254152	0.331	0.23	3.54952e-15	EC2	Dusp23
Impad1	2.50052e-19	0.338067	0.56	0.449	8.11467e-15	EC2	Impad1
Slc43a3	2.75719e-19	1.04356	0.285	0.188	8.94764e-15	EC2	Slc43a3
Ift27	6.71401e-19	0.322474	0.596	0.498	2.17883e-14	EC2	Ift27
Atraid	1.0161e-18	3.04176	0.918	0.843	3.29744e-14	EC2	Atraid
Pacsin2	1.13252e-18	0.3332	0.404	0.296	3.67526e-14	EC2	Pacsin2
Asnsd1	2.79205e-18	0.297383	0.605	0.504	9.06078e-14	EC2	Asnsd1
Fam32a	3.5277e-18	1.14797	0.682	0.584	1.14481e-13	EC2	Fam32a
Pnpla8	5.38629e-18	0.282309	0.506	0.399	1.74796e-13	EC2	Pnpla8
Papd4	6.1128e-18	0.634288	0.451	0.35	1.98373e-13	EC2	Papd4
Tbxa2r	6.31644e-18	0.432174	0.262	0.171	2.04981e-13	EC2	Tbxa2r
Zcchc6	7.37021e-18	0.422565	0.41	0.31	2.39178e-13	EC2	Zcchc6
Zfp651	1.06415e-17	0.251544	0.332	0.234	3.45338e-13	EC2	Zfp651
Wwp1	6.56206e-17	0.377749	0.389	0.293	2.12952e-12	EC2	Wwp1
Fmnl2	1.10389e-16	0.281355	0.334	0.241	3.58235e-12	EC2	Fmnl2
Ywhag	1.32833e-16	0.622846	0.54	0.448	4.31069e-12	EC2	Ywhag
Cnep1r1	1.37563e-16	0.303019	0.628	0.528	4.46418e-12	EC2	Cnep1r1
Myo9a	1.39138e-16	0.352304	0.362	0.265	4.5153e-12	EC2	Myo9a
Slc35f5	1.60539e-16	0.382698	0.579	0.472	5.20981e-12	EC2	Slc35f5
Vps29	1.85088e-16	0.305307	0.763	0.682	6.00648e-12	EC2	Vps29
Deaf1	2.37613e-16	0.365746	0.423	0.323	7.71101e-12	EC2	Deaf1
AU019823	2.37813e-16	0.252031	0.324	0.232	7.7175e-12	EC2	AU019823
Emp3	2.43223e-16	17.8818	0.988	0.972	7.89307e-12	EC2	Emp3
Acat1	3.27431e-16	2.0883	0.905	0.84	1.06258e-11	EC2	Acat1
Atp6v1f	3.29231e-16	0.533663	0.866	0.807	1.06842e-11	EC2	Atp6v1f
Camk1	6.64564e-16	0.766238	0.736	0.642	2.15664e-11	EC2	Camk1
Tcf7l1	7.39512e-16	0.281579	0.368	0.271	2.39987e-11	EC2	Tcf7l1
Lsm10	1.10627e-15	0.473035	0.496	0.408	3.59008e-11	EC2	Lsm10
Rnf2	1.524e-15	0.378162	0.559	0.468	4.94567e-11	EC2	Rnf2
Alas1	2.33878e-15	0.900757	0.282	0.196	7.58979e-11	EC2	Alas1
Kif2a	2.47673e-15	0.34371	0.417	0.32	8.03747e-11	EC2	Kif2a
Zbtb1	2.97305e-15	0.254734	0.322	0.231	9.64814e-11	EC2	Zbtb1
Taok1	4.74499e-15	0.297587	0.41	0.315	1.53984e-10	EC2	Taok1
Mtx2	5.25227e-15	0.269249	0.697	0.609	1.70447e-10	EC2	Mtx2
Snx6	6.36922e-15	0.483967	0.769	0.688	2.06694e-10	EC2	Snx6
Ctdsp2	1.03627e-14	0.294734	0.56	0.464	3.36292e-10	EC2	Ctdsp2
Pdcd6ip	1.25607e-14	0.273238	0.478	0.382	4.0762e-10	EC2	Pdcd6ip
Kpna4	1.76179e-14	0.303801	0.408	0.317	5.71736e-10	EC2	Kpna4
Plekhf1	1.81005e-14	0.517649	0.293	0.211	5.87398e-10	EC2	Plekhf1
Etfb	2.08006e-14	1.39589	0.888	0.835	6.75022e-10	EC2	Etfb
Nrip11	2.61893e-14	0.278298	0.389	0.296	8.49895e-10	EC2	Nrip1
Sox4	2.7063e-14	3.87337	0.694	0.602	8.78249e-10	EC2	Sox4
Ccdc50	3.34306e-14	0.312991	0.455	0.362	1.08489e-09	EC2	Ccdc50
Tmx4	3.71739e-14	0.250993	0.324	0.239	1.20637e-09	EC2	Tmx4
Mageh1	6.9699e-14	2.54195	0.605	0.519	2.26187e-09	EC2	Mageh1
Ube2w	7.5002e-14	0.306384	0.558	0.474	2.43396e-09	EC2	Ube2w
Sp3os	8.01196e-14	0.269452	0.303	0.219	2.60004e-09	EC2	Sp3os
Tln1	1.39944e-13	0.550736	0.755	0.694	4.54145e-09	EC2	Tln1
Acadm	1.98225e-13	0.607969	0.541	0.447	6.43279e-09	EC2	Acadm
Zfp451	2.17117e-13	0.262042	0.386	0.298	7.04589e-09	EC2	Zfp451
Sbds	3.5067e-13	0.591274	0.54	0.45	1.13799e-08	EC2	Sbds
Ahcyl1	6.12535e-13	0.34557	0.412	0.327	1.9878e-08	EC2	Ahcyl1
Zfp9	6.29324e-13	0.437119	0.474	0.388	2.04228e-08	EC2	Zfp9
Slc25a24	6.35364e-13	0.287541	0.397	0.311	2.06188e-08	EC2	Slc25a24
Slc37a3	8.03754e-13	0.266278	0.348	0.264	2.60834e-08	EC2	Slc37a3
Ap3b1	8.99916e-13	0.252675	0.415	0.328	2.92041e-08	EC2	Ap3b1
Strn3	1.11641e-12	0.334582	0.665	0.582	3.62298e-08	EC2	Strn3
Cyb5r4	1.42821e-12	0.286742	0.354	0.268	4.63483e-08	EC2	Cyb5r4
Tob1	1.53779e-12	2.73047	0.514	0.424	4.99044e-08	EC2	Tob1
Dnm1l	1.62594e-12	0.335949	0.502	0.415	5.2765e-08	EC2	Dnm1l
Slc9a3r2	1.78757e-12	0.302009	0.432	0.34	5.80104e-08	EC2	Slc9a3r2
Rnh1	2.29984e-12	0.573227	0.732	0.656	7.46343e-08	EC2	Rnh1
Rb1cc1	2.34264e-12	0.289274	0.437	0.353	7.60232e-08	EC2	Rb1cc1
Tbc1d24	3.19822e-12	0.509328	0.201	0.283	1.03788e-07	EC2	Tbc1d24
Slc39a6	4.46368e-12	0.406263	0.495	0.42	1.44855e-07	EC2	Slc39a6
Snapin	4.7288e-12	0.463903	0.57	0.49	1.53459e-07	EC2	Snapin
Nfkbia	4.90508e-12	1.94934	0.715	0.675	1.5918e-07	EC2	Nfkbia
Pola2	5.99007e-12	0.937445	0.279	0.203	1.9439e-07	EC2	Pola2
1810055G02Rik	8.81458e-12	0.422315	0.499	0.415	2.86051e-07	EC2	1810055G02Rik
Mocs2	9.11357e-12	0.390961	0.588	0.508	2.95753e-07	EC2	Mocs2
Psme4	1.46751e-11	0.589239	0.378	0.297	4.76238e-07	EC2	Psme4
Gfpt1	2.15356e-11	0.404189	0.564	0.478	6.98874e-07	EC2	Gfpt1
Abhd5	2.39584e-11	0.460278	0.338	0.261	7.77497e-07	EC2	Abhd5
Scyl1	2.51452e-11	0.272962	0.482	0.394	8.16012e-07	EC2	Scyl1
1810037I17Rik	2.63759e-11	0.918237	0.845	0.8	8.55949e-07	EC2	1810037I17Rik
Slc25a39	2.66915e-11	0.281565	0.382	0.302	8.66194e-07	EC2	Slc25a39
Trappc6b	3.56198e-11	0.407612	0.651	0.579	1.15593e-06	EC2	Trappc6b
Smim20	3.66847e-11	0.30287	0.545	0.467	1.19049e-06	EC2	Smim20
Exoc5	4.17211e-11	0.290054	0.387	0.311	1.35393e-06	EC2	Exoc5
Ccng1	5.71023e-11	0.407471	0.431	0.35	1.85308e-06	EC2	Ccng1
Frmd6	8.59057e-11	0.317778	0.406	0.327	2.78781e-06	EC2	Frmd6
Tspo	1.42934e-10	2.31249	0.342	0.425	4.63848e-06	EC2	Tspo
Itfg1	1.66873e-10	0.528688	0.517	0.436	5.41537e-06	EC2	Itfg1
Rtn4	2.19237e-10	0.470646	0.877	0.835	7.11467e-06	EC2	Rtn4
Nmd3	2.6478e-10	0.825988	0.342	0.27	8.59265e-06	EC2	Nmd3
Cnot6	4.26062e-10	0.326277	0.566	0.484	1.38266e-05	EC2	Cnot6
4930402H24Rik	4.87748e-10	0.283779	0.327	0.255	1.58284e-05	EC2	4930402H24Rik
Trip11	5.5065e-10	0.963907	0.488	0.412	1.78697e-05	EC2	Trip11
Midn	7.43913e-10	0.253404	0.367	0.292	2.41415e-05	EC2	Midn
Nfu1	1.38723e-09	0.262923	0.53	0.459	4.50184e-05	EC2	Nfu1
Anp32e1	2.55452e-09	0.284675	0.556	0.585	8.28992e-05	EC2	Anp32e
Evi5	3.11863e-09	0.703141	0.547	0.486	0.000101206	EC2	Evi5
Desi2	3.55464e-09	0.331156	0.641	0.576	0.000115355	EC2	Desi2
Nisch	3.78295e-09	1.76133	0.878	0.832	0.000122764	EC2	Nisch
Ormdl3	4.09181e-09	0.28265	0.554	0.488	0.000132787	EC2	Ormdl3
Smarcd2	8.9327e-09	0.526735	0.534	0.463	0.000289884	EC2	Smarcd2
Rnf19a	9.90487e-09	0.58647	0.267	0.207	0.000321433	EC2	Rnf19a
Ppp3cb	1.0974e-08	0.344188	0.475	0.402	0.000356128	EC2	Ppp3cb
Rtca	1.11536e-08	0.660284	0.376	0.304	0.000361957	EC2	Rtca
Flrt3	1.11622e-08	0.370575	0.28	0.219	0.000362236	EC2	Flrt3
Pik3ca	1.74228e-08	0.393571	0.345	0.279	0.000565404	EC2	Pik3ca
3632451O06Rik	2.12191e-08	0.608539	0.377	0.31	0.000688603	EC2	3632451O06Rik
Akr1e1	2.21184e-08	0.298977	0.372	0.307	0.000717788	EC2	Akr1e1
Arl5b	3.5301e-08	0.443574	0.319	0.256	0.00114559	EC2	Arl5b
Ypel3	3.57666e-08	1.29634	0.749	0.674	0.0011607	EC2	Ypel3
Zcrb1	3.71165e-08	0.250406	0.76	0.717	0.00120451	EC2	Zcrb1
Macf1	6.12812e-08	0.492825	0.564	0.508	0.0019887	EC2	Macf1
Arl6ip6	1.26621e-07	0.586841	0.494	0.427	0.00410909	EC2	Arl6ip6
Prnp	3.34515e-07	0.679106	0.444	0.382	0.0108557	EC2	Prnp
Maff	3.69077e-07	1.22893	0.262	0.212	0.0119773	EC2	Maff
Bub3	3.9614e-07	2.38551	0.552	0.59	0.0128555	EC2	Bub3
Nktr	6.38507e-07	1.10675	0.808	0.757	0.0207208	EC2	Nktr
Iah1	6.58131e-07	0.286335	0.447	0.384	0.0213577	EC2	Iah1
Frg1	7.31363e-07	0.344103	0.517	0.458	0.0237342	EC2	Frg1
Stk11	7.92296e-07	0.253176	0.504	0.442	0.0257116	EC2	Stk11
Eea1	8.12596e-07	0.471048	0.516	0.456	0.0263704	EC2	Eea1
Ccdc127	8.42563e-07	0.276092	0.619	0.562	0.0273428	EC2	Ccdc127
Tmem115	1.22545e-06	0.299567	0.44	0.383	0.0397682	EC2	Tmem115
Rfc3	1.28195e-06	2.01516	0.325	0.268	0.0416017	EC2	Rfc3
Azin1	1.45211e-06	0.341747	0.476	0.413	0.0471239	EC2	Azin1
Nfkbiz	1.47371e-06	0.747972	0.271	0.218	0.0478249	EC2	Nfkbiz
Spats2l1	1.77884e-06	1.73176	0.787	0.718	0.057727	EC2	Spats2l
Vps35	1.8616e-06	0.548932	0.622	0.559	0.0604127	EC2	Vps35
Gnpnat1	2.71908e-06	0.84248	0.466	0.414	0.0882395	EC2	Gnpnat1
Nsmce2	3.52366e-06	0.428966	0.413	0.356	0.11435	EC2	Nsmce2
Larp71	6.02198e-06	0.434418	0.607	0.548	0.195425	EC2	Larp7
Rfc2	7.52829e-06	1.69431	0.627	0.549	0.244308	EC2	Rfc2
Kdm5b	9.44567e-06	2.18363	0.565	0.519	0.306531	EC2	Kdm5b
Herc2	9.48079e-06	0.251058	0.336	0.279	0.307671	EC2	Herc2
2410002F23Rik	1.51962e-05	0.341968	0.479	0.427	0.493147	EC2	2410002F23Rik
Ddx3y	1.66184e-05	0.594234	0.427	0.38	0.539301	EC2	Ddx3y
Mier1	1.73042e-05	0.628476	0.543	0.492	0.561555	EC2	Mier1
Ube2g1	3.28146e-05	0.397324	0.527	0.471	1	EC2	Ube2g1
Rock1	3.50569e-05	0.314524	0.526	0.476	1	EC2	Rock1
Fdps	4.09416e-05	10.4776	0.514	0.54	1	EC2	Fdps
Btbd1	0.000101589	0.342008	0.54	0.49	1	EC2	Btbd1
Btg2	0.000184724	7.81254	0.579	0.534	1	EC2	Btg2
Hprt	0.00033309	3.74851	0.667	0.583	1	EC2	Hprt
Thbs3	0.000691302	0.979246	0.511	0.468	1	EC2	Thbs3
Egln2	0.000831797	0.302403	0.583	0.539	1	EC2	Egln2
Mcm3	0.000877387	4.11264	0.337	0.293	1	EC2	Mcm3
Rpa21	0.000976009	1.2999	0.474	0.426	1	EC2	Rpa2
Txndc9	0.00119361	0.419603	0.68	0.636	1	EC2	Txndc9
Casp8ap2	0.00170225	0.404489	0.352	0.316	1	EC2	Casp8ap2
Map4	0.00214828	0.545475	0.558	0.524	1	EC2	Map4
Ccnh	0.00225893	0.320782	0.447	0.411	1	EC2	Ccnh
Bak1	0.00234322	0.354526	0.387	0.353	1	EC2	Bak1
Phax	0.00239939	0.728596	0.59	0.554	1	EC2	Phax
Ctsd	0.00318488	0.77879	0.923	0.899	1	EC2	Ctsd
Zfp292	0.00450137	0.871084	0.455	0.421	1	EC2	Zfp292
Sde2	0.00571248	0.42035	0.52	0.488	1	EC2	Sde2
Plod3	0.00625714	20.0909	0.502	0.467	1	EC2	Plod3
Tcf19	0.00835147	1.37995	0.27	0.244	1	EC2	Tcf19
Zc3h131	0.00840216	0.344371	0.521	0.492	1	EC2	Zc3h13
Impact1	0.0088476	0.757456	0.278	0.247	1	EC2	Impact
Dlk1	0	46.0482	0.996	0.882	0	EC3	Dlk1
Itm2a	0	45.3608	1	0.995	0	EC3	Itm2a
Plagl1	0	24.1582	0.977	0.794	0	EC3	Plagl1
Lpar4	0	10.705	0.848	0.379	0	EC3	Lpar4
Nefl	0	9.63236	0.368	0.049	0	EC3	Nefl
Col6a6	0	6.80942	0.704	0.182	0	EC3	Col6a6
Kitl	0	6.75538	0.698	0.173	0	EC3	Kitl
Dpp4	0	4.46677	0.745	0.216	0	EC3	Dpp4
Rtl31	0	4.15954	0.751	0.247	0	EC3	Rtl3
Selenop	0	4.12083	0.767	0.247	0	EC3	Selenop
Ccdc80	0	4.03131	0.97	0.594	0	EC3	Ccdc80
Creb51	0	2.70966	0.8	0.329	0	EC3	Creb5
Arhgap202	0	2.36418	0.794	0.274	0	EC3	Arhgap20
Clec3b1	0	2.04243	0.95	0.406	0	EC3	Clec3b
Tek2	0	1.3913	0.629	0.18	0	EC3	Tek
Galnt172	0	1.12276	0.582	0.143	0	EC3	Galnt17
Efhd11	0	0.78519	0.726	0.213	0	EC3	Efhd1
Tmeff21	0	0.737045	0.873	0.272	0	EC3	Tmeff2
6330403K07Rik	1.37612e-307	1.12252	0.751	0.296	4.4658e-303	EC3	6330403K07Rik
Ebf1	3.95158e-291	5.1764	0.967	0.637	1.28237e-286	EC3	Ebf1
Gata61	1.27061e-282	1.03632	0.41	0.081	4.12339e-278	EC3	Gata6
C1qtnf71	1.74866e-280	1.20643	0.585	0.17	5.67474e-276	EC3	C1qtnf7
Cited2	1.45968e-279	4.00317	0.865	0.475	4.73695e-275	EC3	Cited2
Gap431	2.79915e-268	1.16233	0.905	0.483	9.0838e-264	EC3	Gap43
Angptl1	7.5419e-267	1.15649	0.865	0.388	2.4475e-262	EC3	Angptl1
Atf31	5.73158e-264	3.05204	0.684	0.283	1.86001e-259	EC3	Atf3
Trio	2.48353e-257	3.66649	0.846	0.447	8.05956e-253	EC3	Trio
Klf4	2.36395e-256	30.0396	0.946	0.695	7.67148e-252	EC3	Klf4
Col5a31	1.86476e-253	1.18171	0.677	0.242	6.05152e-249	EC3	Col5a3
Cebpd1	2.36412e-237	1.02262	0.57	0.188	7.67204e-233	EC3	Cebpd
Ugdh	5.5302e-236	14.0514	0.883	0.637	1.79466e-231	EC3	Ugdh
Tmem26	1.20874e-234	3.10349	0.55	0.176	3.92261e-230	EC3	Tmem26
Cops9	2.08577e-227	3.10745	0.81	0.358	6.76876e-223	EC3	Cops9
Ppp1r15a	6.50106e-227	8.96863	0.845	0.548	2.10973e-222	EC3	Ppp1r15a
Dpt	1.27672e-223	5.82069	0.749	0.362	4.14321e-219	EC3	Dpt
Sulf1	1.84113e-222	3.97155	0.73	0.318	5.97483e-218	EC3	Sulf1
Peg10	1.58443e-220	0.960585	0.378	0.087	5.14179e-216	EC3	Peg10
Pcdh192	2.71003e-220	1.55658	0.642	0.248	8.79458e-216	EC3	Pcdh19
Jpt11	9.61048e-220	1.43453	0.724	0.3	3.11879e-215	EC3	Jpt1
Marcks1	1.71223e-219	2.13675	0.995	0.965	5.55654e-215	EC3	Marcks
Gm87971	1.12558e-217	0.569067	0.788	0.418	3.65273e-213	EC3	Gm8797
Kank11	4.22629e-213	1.17297	0.491	0.149	1.37151e-208	EC3	Kank1
Serping1	2.56468e-206	0.934674	0.882	0.533	8.32289e-202	EC3	Serping1
Spock3	1.49139e-205	1.48283	0.526	0.176	4.83987e-201	EC3	Spock3
Sema5a	2.62322e-198	2.01545	0.708	0.336	8.51289e-194	EC3	Sema5a
Nop53	1.17161e-195	2.81967	0.766	0.334	3.8021e-191	EC3	Nop53
Cbln21	1.41656e-193	0.880768	0.395	0.105	4.59702e-189	EC3	Cbln2
Syn2	3.03666e-191	0.793257	0.283	0.054	9.85456e-187	EC3	Syn2
Mcrip11	1.63968e-188	0.784134	0.774	0.342	5.32107e-184	EC3	Mcrip1
Rspo21	4.363e-187	1.05715	0.36	0.091	1.41588e-182	EC3	Rspo2
Hbb-bs	2.07627e-186	Inf	0.989	0.96	6.73792e-182	EC3	Hbb-bs
Hbb-bt	1.28245e-185	72.2987	0.922	0.696	4.1618e-181	EC3	Hbb-bt
Cdc42ep21	3.1433e-184	1.05898	0.704	0.325	1.02007e-179	EC3	Cdc42ep2
AW5519841	1.37776e-181	1.40732	0.8	0.435	4.4711e-177	EC3	AW551984
Luzp21	4.54362e-178	1.01371	0.366	0.097	1.4745e-173	EC3	Luzp2
Ldb21	4.6685e-178	2.84802	0.558	0.222	1.51502e-173	EC3	Ldb2
Ahnak21	6.18468e-177	1.36309	0.786	0.41	2.00705e-172	EC3	Ahnak2
Eloc1	1.4374e-174	0.480337	0.706	0.314	4.66465e-170	EC3	Eloc
Ppp2r2b1	1.62639e-174	0.756751	0.349	0.09	5.27797e-170	EC3	Ppp2r2b
S100b	1.12969e-170	3.62471	0.706	0.347	3.66607e-166	EC3	S100b
Tshz2	2.50479e-170	3.36825	0.791	0.503	8.12855e-166	EC3	Tshz2
Rtl8a2	1.07915e-167	1.58482	0.6	0.241	3.50206e-163	EC3	Rtl8a
Klf61	7.19742e-167	2.05358	0.875	0.671	2.33571e-162	EC3	Klf6
Arid5b	1.0028e-166	3.63373	0.725	0.398	3.25427e-162	EC3	Arid5b
Ebf31	2.48914e-165	1.35105	0.448	0.151	8.07776e-161	EC3	Ebf3
Gem	2.04613e-157	1.86467	0.453	0.166	6.64011e-153	EC3	Gem
Piezo2	7.30004e-153	1.28394	0.442	0.157	2.36901e-148	EC3	Piezo2
Vps282	1.32038e-149	1.19043	0.571	0.238	4.2849e-145	EC3	Vps28
Tmem1581	2.81212e-149	0.530037	0.514	0.209	9.1259e-145	EC3	Tmem158
Nbdy	2.02756e-143	0.781092	0.586	0.247	6.57985e-139	EC3	Nbdy
Armcx21	2.20271e-143	1.91943	0.818	0.579	7.14823e-139	EC3	Armcx2
Fzd41	1.60861e-142	0.688525	0.328	0.094	5.22026e-138	EC3	Fzd4
Rpl18a	4.33601e-141	29.0083	1	1	1.40712e-136	EC3	Rpl18a
Ints6	3.71663e-138	0.507882	0.523	0.22	1.20612e-133	EC3	Ints6
Utp111	3.85881e-138	0.595406	0.574	0.248	1.25226e-133	EC3	Utp11
Tmem1001	9.55042e-138	3.05284	0.767	0.46	3.0993e-133	EC3	Tmem100
Gas1	1.1663e-137	6.49923	0.912	0.726	3.78488e-133	EC3	Gas1
Add31	3.3864e-137	1.02422	0.815	0.532	1.09896e-132	EC3	Add3
Igf1	2.27754e-136	6.92997	0.853	0.592	7.39109e-132	EC3	Igf1
Cygb	3.38904e-136	1.33873	0.595	0.278	1.09981e-131	EC3	Cygb
Ppp1r9a1	4.33306e-132	0.656051	0.35	0.111	1.40616e-127	EC3	Ppp1r9a
Klhl131	5.25369e-131	2.05906	0.518	0.23	1.70493e-126	EC3	Klhl13
Dmac1	4.64618e-128	0.797727	0.535	0.233	1.50778e-123	EC3	Dmac1
Hikeshi	6.00511e-128	0.709122	0.469	0.186	1.94878e-123	EC3	Hikeshi
Triobp1	7.87774e-128	0.646937	0.703	0.392	2.55648e-123	EC3	Triobp
Rtl8b1	1.89011e-127	0.52116	0.455	0.176	6.1338e-123	EC3	Rtl8b
Eloa1	4.25871e-126	0.669942	0.442	0.171	1.38204e-121	EC3	Eloa
Calml41	1.6601e-124	0.763858	0.642	0.33	5.38735e-120	EC3	Calml4
Tlnrd1	1.98853e-124	1.21996	0.331	0.105	6.45316e-120	EC3	Tlnrd1
Nr4a1	1.32549e-123	3.00732	0.686	0.397	4.30147e-119	EC3	Nr4a1
Spty2d12	3.49052e-122	1.37492	0.674	0.402	1.13274e-117	EC3	Spty2d1
Filip1l2	9.8646e-122	0.555435	0.585	0.296	3.20126e-117	EC3	Filip1l
Dnajb9	1.43165e-120	1.65668	0.759	0.52	4.64599e-116	EC3	Dnajb9
Ntn11	1.13154e-119	1.92066	0.474	0.197	3.67207e-115	EC3	Ntn1
Sptbn11	1.38283e-118	1.11441	0.901	0.716	4.48757e-114	EC3	Sptbn1
Scara31	9.65532e-117	0.846093	0.784	0.523	3.13334e-112	EC3	Scara3
Nectin22	2.54216e-115	0.929344	0.413	0.162	8.24981e-111	EC3	Nectin2
Smim271	4.21511e-115	0.586215	0.473	0.199	1.36789e-110	EC3	Smim27
AC160336.1	9.52706e-115	5.03921	0.547	0.244	3.09172e-110	EC3	AC160336.1
Tcf7l2	7.72194e-113	2.17864	0.722	0.471	2.50592e-108	EC3	Tcf7l2
Paxx1	1.01357e-112	0.500827	0.386	0.142	3.28925e-108	EC3	Paxx
Ftl1-ps11	9.14885e-112	0.688618	0.443	0.181	2.96898e-107	EC3	Ftl1-ps1
Mesd	4.08862e-108	0.263211	0.506	0.225	1.32684e-103	EC3	Mesd
Maged2	1.07713e-104	5.05473	0.986	0.949	3.49549e-100	EC3	Maged2
Washc31	4.44669e-104	0.472114	0.41	0.164	1.44304e-99	EC3	Washc3
Ric8a	8.41138e-104	0.408741	0.379	0.145	2.72966e-99	EC3	Ric8a
Hdgfl31	1.60485e-103	0.658399	0.402	0.16	5.20805e-99	EC3	Hdgfl3
Wsb11	1.70678e-103	0.841465	0.802	0.6	5.53884e-99	EC3	Wsb1
Pcdh10	3.49834e-103	1.35275	0.275	0.087	1.13528e-98	EC3	Pcdh10
Zdbf2	4.65391e-103	3.33166	0.578	0.316	1.51029e-98	EC3	Zdbf2
Mirg1	1.81372e-102	1.19282	0.415	0.173	5.88589e-98	EC3	Mirg
Thra	9.2261e-102	2.29204	0.908	0.742	2.99405e-97	EC3	Thra
Adamts5	1.15835e-100	4.21312	0.758	0.473	3.75908e-96	EC3	Adamts5
Arsj1	9.73217e-100	0.344032	0.302	0.101	3.15828e-95	EC3	Arsj
Fbxl7	2.04607e-98	0.619036	0.397	0.162	6.63991e-94	EC3	Fbxl7
Nfib	1.03576e-97	2.13317	0.938	0.799	3.36126e-93	EC3	Nfib
Armcx6	1.97261e-97	0.962428	0.506	0.255	6.40152e-93	EC3	Armcx6
Tob11	2.87441e-97	0.280632	0.65	0.407	9.32804e-93	EC3	Tob1
Ccnl1	4.79493e-97	2.36698	0.851	0.714	1.55605e-92	EC3	Ccnl1
Nsd31	1.97407e-96	0.465072	0.441	0.191	6.40625e-92	EC3	Nsd3
Rpl36a-ps11	1.50653e-95	0.513933	0.408	0.17	4.889e-91	EC3	Rpl36a-ps1
Tro1	2.12196e-95	1.34308	0.492	0.245	6.88619e-91	EC3	Tro
Pnrc1	2.44328e-95	2.58527	0.878	0.753	7.92893e-91	EC3	Pnrc1
Dpep11	1.27294e-94	1.60205	0.561	0.293	4.13093e-90	EC3	Dpep1
Lysmd31	5.42154e-94	0.569926	0.611	0.364	1.7594e-89	EC3	Lysmd3
Gatd1	3.55602e-93	0.452274	0.436	0.191	1.154e-88	EC3	Gatd1
Vgll31	4.61683e-93	0.953824	0.337	0.128	1.49825e-88	EC3	Vgll3
Fgf7	1.70891e-92	0.315261	0.305	0.109	5.54575e-88	EC3	Fgf7
Washc2	1.71429e-92	0.57087	0.341	0.131	5.56321e-88	EC3	Washc2
Efnb21	1.72282e-92	0.836467	0.419	0.187	5.59089e-88	EC3	Efnb2
Mrpl581	2.17507e-91	0.345852	0.452	0.203	7.05854e-87	EC3	Mrpl58
Adam231	3.95181e-91	0.634888	0.4	0.171	1.28244e-86	EC3	Adam23
Klf31	2.94243e-90	1.18078	0.751	0.508	9.54877e-86	EC3	Klf3
Rab7b1	5.58726e-87	0.373677	0.387	0.163	1.81318e-82	EC3	Rab7b
Rhob	1.44614e-86	4.04294	0.756	0.581	4.69301e-82	EC3	Rhob
Nfe2l21	1.45296e-86	1.87324	0.635	0.406	4.71514e-82	EC3	Nfe2l2
Mt21	2.13097e-86	3.18033	0.355	0.148	6.91542e-82	EC3	Mt2
Ndn	3.94493e-86	4.89749	0.938	0.845	1.28021e-81	EC3	Ndn
Zbtb7a	1.3056e-85	2.29149	0.706	0.476	4.23694e-81	EC3	Zbtb7a
Rtf2	1.31684e-84	0.424404	0.355	0.146	4.27342e-80	EC3	Rtf2
Washc1	7.08835e-84	0.442115	0.326	0.128	2.30031e-79	EC3	Washc1
Man1a1	1.00239e-83	1.43443	0.585	0.341	3.25295e-79	EC3	Man1a
Naaa2	2.59313e-83	0.312139	0.562	0.317	8.41521e-79	EC3	Naaa
Ramp3	2.61675e-83	2.04784	0.268	0.094	8.49187e-79	EC3	Ramp3
Mia2	2.97287e-83	0.351998	0.406	0.18	9.64755e-79	EC3	Mia2
Afap12	4.29168e-82	0.388825	0.677	0.441	1.39274e-77	EC3	Afap1
Pycard1	5.34083e-81	0.974487	0.766	0.544	1.73321e-76	EC3	Pycard
Zeb11	4.78711e-80	2.14864	0.702	0.477	1.55351e-75	EC3	Zeb1
Sult5a1	4.85349e-80	0.642711	0.384	0.18	1.57506e-75	EC3	Sult5a1
Fmc1	5.87788e-80	0.360361	0.404	0.181	1.90749e-75	EC3	Fmc1
Tmsb10	8.48969e-79	12.1838	1	0.999	2.75507e-74	EC3	Tmsb10
Dnaja11	1.01026e-78	1.5846	0.964	0.913	3.2785e-74	EC3	Dnaja1
Bend5	1.78678e-77	0.672346	0.532	0.299	5.79844e-73	EC3	Bend5
Flrt21	1.07702e-76	0.400374	0.621	0.417	3.49514e-72	EC3	Flrt2
Hic11	1.49913e-76	0.382765	0.4	0.186	4.86497e-72	EC3	Hic1
Lgals91	3.37185e-76	0.693936	0.59	0.352	1.09423e-71	EC3	Lgals9
Col2a1	4.67369e-76	39.0574	0.781	0.557	1.5167e-71	EC3	Col2a1
Ppp1r101	8.70745e-76	1.68508	0.548	0.332	2.82574e-71	EC3	Ppp1r10
Fam171b1	2.05599e-74	0.741576	0.36	0.162	6.6721e-70	EC3	Fam171b
Virma	3.41818e-74	0.312607	0.293	0.115	1.10927e-69	EC3	Virma
Camk2d1	5.32117e-74	2.33433	0.685	0.464	1.72683e-69	EC3	Camk2d
Matn21	2.14381e-73	1.90329	0.821	0.646	6.95708e-69	EC3	Matn2
Nsmce31	1.73811e-72	0.32831	0.349	0.151	5.6405e-68	EC3	Nsmce3
Ubtd21	8.75468e-72	0.668632	0.474	0.257	2.84107e-67	EC3	Ubtd2
Kctd171	2.58953e-70	0.484977	0.313	0.132	8.40354e-66	EC3	Kctd17
Abcc91	2.65544e-70	0.438847	0.302	0.124	8.61744e-66	EC3	Abcc9
Mfsd14b	2.86717e-70	0.326948	0.288	0.115	9.30455e-66	EC3	Mfsd14b
Ppp4r3b	7.95807e-70	0.334152	0.372	0.171	2.58255e-65	EC3	Ppp4r3b
Tnfsf121	2.64198e-69	0.47346	0.398	0.197	8.57376e-65	EC3	Tnfsf12
Rap1b	5.04742e-69	4.05489	0.956	0.886	1.63799e-64	EC3	Rap1b
Ahnak	8.67218e-69	11.0518	0.98	0.93	2.81429e-64	EC3	Ahnak
Bicc1	1.16968e-68	0.853363	0.779	0.595	3.79586e-64	EC3	Bicc1
Sdcbp1	2.42826e-68	0.337249	0.88	0.767	7.8802e-64	EC3	Sdcbp
Cd47	4.68005e-68	0.638659	0.891	0.772	1.51877e-63	EC3	Cd47
Rplp0	7.26136e-66	6.00877	1	1	2.35646e-61	EC3	Rplp0
Dlg41	1.72534e-64	0.527302	0.46	0.252	5.59906e-60	EC3	Dlg4
Galnt161	2.02282e-64	0.27419	0.334	0.15	6.56445e-60	EC3	Galnt16
Mid1	6.16971e-64	0.434125	0.4	0.203	2.00219e-59	EC3	Mid1
B2m1	8.08283e-64	1.06505	0.988	0.96	2.62304e-59	EC3	B2m
Adamts12	7.84917e-63	0.441581	0.339	0.155	2.54721e-58	EC3	Adamts12
Zfhx3	1.2864e-62	1.04972	0.937	0.807	4.17464e-58	EC3	Zfhx3
Spag91	1.32495e-62	0.960533	0.748	0.585	4.29974e-58	EC3	Spag9
Coq10b1	2.00262e-62	0.673508	0.48	0.28	6.49889e-58	EC3	Coq10b
Lhfpl21	5.50587e-62	0.301559	0.568	0.347	1.78676e-57	EC3	Lhfpl2
Smarca1	8.59164e-62	1.32215	0.608	0.401	2.78816e-57	EC3	Smarca1
Bmp31	9.41984e-62	1.71435	0.418	0.217	3.05693e-57	EC3	Bmp3
Gm12166	1.19579e-61	0.327552	0.276	0.115	3.88059e-57	EC3	Gm12166
B3galnt11	4.3888e-61	0.621007	0.598	0.388	1.42425e-56	EC3	B3galnt1
Jag11	6.70399e-61	2.41354	0.469	0.256	2.17558e-56	EC3	Jag1
Fez11	4.8876e-60	0.620742	0.425	0.231	1.58612e-55	EC3	Fez1
Pea15a1	2.27426e-59	1.35428	0.675	0.464	7.38044e-55	EC3	Pea15a
Plscr1	2.45291e-59	0.672991	0.258	0.108	7.96018e-55	EC3	Plscr1
Cep1701	7.26102e-59	1.0958	0.544	0.339	2.35635e-54	EC3	Cep170
Adgrl3	8.40953e-59	1.03572	0.353	0.173	2.72906e-54	EC3	Adgrl3
Samd51	2.68922e-58	0.754473	0.355	0.177	8.72705e-54	EC3	Samd5
Nufip22	3.02305e-58	0.793426	0.533	0.335	9.8104e-54	EC3	Nufip2
Abraxas2	3.834e-58	0.450056	0.295	0.131	1.24421e-53	EC3	Abraxas2
Fam122b1	3.98115e-58	0.607007	0.273	0.119	1.29196e-53	EC3	Fam122b
Armcx31	1.01534e-57	0.807029	0.819	0.673	3.29499e-53	EC3	Armcx3
Ddx50	2.27112e-57	1.16524	0.829	0.698	7.37023e-53	EC3	Ddx50
Ncoa4	1.78672e-56	0.37003	0.276	0.121	5.79828e-52	EC3	Ncoa4
Adam121	3.90572e-56	0.466174	0.416	0.223	1.26748e-51	EC3	Adam12
Babam2	1.03038e-55	0.251939	0.253	0.106	3.34379e-51	EC3	Babam2
Flywch22	2.88006e-55	0.706036	0.4	0.216	9.34638e-51	EC3	Flywch2
Igsf10	3.13156e-55	1.3477	0.757	0.584	1.01626e-50	EC3	Igsf10
Lnpk	4.86087e-55	0.368474	0.27	0.117	1.57745e-50	EC3	Lnpk
Nfkbiz1	8.63481e-55	2.65667	0.378	0.205	2.80217e-50	EC3	Nfkbiz
Retreg2	1.15333e-54	0.352605	0.261	0.113	3.7428e-50	EC3	Retreg2
Ext12	1.90898e-54	1.11719	0.537	0.346	6.19503e-50	EC3	Ext1
Bst2	2.07482e-54	6.05823	0.351	0.193	6.73319e-50	EC3	Bst2
Naxd1	2.38204e-54	0.316412	0.36	0.179	7.73021e-50	EC3	Naxd
Tiparp	5.80197e-54	1.55297	0.521	0.347	1.88286e-49	EC3	Tiparp
Hacd41	3.10947e-53	1.19374	0.454	0.272	1.00908e-48	EC3	Hacd4
Dhrs71	3.66942e-53	0.322065	0.609	0.415	1.1908e-48	EC3	Dhrs7
Eef1akmt2	1.15564e-52	0.265289	0.275	0.123	3.75028e-48	EC3	Eef1akmt2
Tbc1d231	2.99478e-52	0.588746	0.443	0.257	9.71868e-48	EC3	Tbc1d23
Col4a3bp	1.34755e-51	0.444882	0.313	0.154	4.37307e-47	EC3	Col4a3bp
Sntb21	2.02227e-51	0.533828	0.675	0.493	6.56268e-47	EC3	Sntb2
Zfp9481	2.89574e-51	0.687538	0.442	0.263	9.39725e-47	EC3	Zfp948
Klf21	5.07724e-51	1.26357	0.883	0.79	1.64767e-46	EC3	Klf2
Sh3d191	5.84634e-51	0.831335	0.484	0.301	1.89725e-46	EC3	Sh3d19
Dusp102	7.06665e-51	0.568513	0.381	0.203	2.29327e-46	EC3	Dusp10
Ror11	1.79875e-50	0.367331	0.265	0.121	5.8373e-46	EC3	Ror1
Plxdc21	2.38315e-50	0.283486	0.479	0.291	7.7338e-46	EC3	Plxdc2
Junb	3.52186e-50	17.0014	0.881	0.79	1.14291e-45	EC3	Junb
Tfpi	4.27344e-50	0.523531	0.656	0.461	1.38682e-45	EC3	Tfpi
Acvrl11	6.40104e-50	0.465812	0.388	0.211	2.07726e-45	EC3	Acvrl1
Tpm3-rs7	9.08234e-50	0.584622	0.358	0.187	2.9474e-45	EC3	Tpm3-rs7
Csrnp1	6.6188e-48	0.542029	0.347	0.185	2.14793e-43	EC3	Csrnp1
Maff1	1.57392e-47	1.16703	0.36	0.2	5.10767e-43	EC3	Maff
Bloc1s1	1.86714e-47	0.526051	0.614	0.441	6.05924e-43	EC3	Bloc1s1
Fyn1	3.03752e-47	0.33834	0.541	0.359	9.85736e-43	EC3	Fyn
Pbxip11	3.42418e-47	0.663456	0.559	0.363	1.11122e-42	EC3	Pbxip1
Hspa1a1	3.62002e-47	0.495227	0.294	0.145	1.17477e-42	EC3	Hspa1a
Pcf11	4.57374e-47	0.514034	0.507	0.33	1.48427e-42	EC3	Pcf11
Sqstm11	1.40734e-46	1.24261	0.689	0.537	4.5671e-42	EC3	Sqstm1
Cntln	1.49243e-46	1.90301	0.516	0.335	4.84325e-42	EC3	Cntln
Sash11	3.37858e-46	0.442677	0.486	0.3	1.09642e-41	EC3	Sash1
Lpar1	3.04248e-45	1.80741	0.824	0.715	9.87347e-41	EC3	Lpar1
Rgl11	3.18336e-45	0.534728	0.366	0.205	1.03306e-40	EC3	Rgl1
Iqgap2	4.44886e-45	0.616199	0.258	0.123	1.44374e-40	EC3	Iqgap2
Entpd21	7.67722e-45	0.417142	0.26	0.123	2.49141e-40	EC3	Entpd2
Stx21	1.07523e-44	0.470529	0.38	0.219	3.48933e-40	EC3	Stx2
Tspan52	1.34424e-44	0.721304	0.511	0.329	4.36233e-40	EC3	Tspan5
Irf1	1.36088e-44	3.27916	0.319	0.171	4.41634e-40	EC3	Irf1
S100a131	3.15613e-44	1.82495	0.831	0.694	1.02423e-39	EC3	S100a13
Sptan1	1.03749e-43	2.15442	0.652	0.477	3.36685e-39	EC3	Sptan1
Mex3b	3.35529e-43	0.529994	0.264	0.128	1.08886e-38	EC3	Mex3b
Nhsl11	4.23206e-43	0.315978	0.351	0.192	1.37339e-38	EC3	Nhsl1
Tia1	1.43677e-42	0.931327	0.354	0.536	4.66261e-38	EC3	Tia1
Erbin	3.34588e-42	0.298881	0.278	0.136	1.0858e-37	EC3	Erbin
Chrdl1	8.40199e-42	1.49187	0.345	0.191	2.72661e-37	EC3	Chrdl1
BC0055372	1.16472e-41	0.252504	0.674	0.512	3.77974e-37	EC3	BC005537
Milr1	1.4934e-41	0.382415	0.288	0.144	4.8464e-37	EC3	Milr1
Taf7	2.56358e-41	0.836286	0.58	0.429	8.31932e-37	EC3	Taf7
Disp11	2.68343e-41	0.30855	0.278	0.14	8.70826e-37	EC3	Disp1
Epb41l31	1.14609e-40	0.983915	0.655	0.499	3.71928e-36	EC3	Epb41l3
Ifrd11	2.71282e-40	0.999628	0.556	0.417	8.80365e-36	EC3	Ifrd1
Gngt21	2.98328e-40	1.45888	0.349	0.197	9.68133e-36	EC3	Gngt2
Kcne1l1	3.70915e-40	0.267995	0.254	0.124	1.20369e-35	EC3	Kcne1l
Pxn1	5.75305e-40	0.34909	0.329	0.182	1.86698e-35	EC3	Pxn
Btbd7	1.74341e-39	0.561811	0.373	0.215	5.65771e-35	EC3	Btbd7
Gfpt21	1.92025e-39	0.345493	0.318	0.174	6.23158e-35	EC3	Gfpt2
Mier3	1.98975e-39	0.459371	0.344	0.194	6.45714e-35	EC3	Mier3
Arhgap291	3.89862e-39	0.59777	0.534	0.37	1.26518e-34	EC3	Arhgap29
Plekhg11	4.37738e-39	0.368931	0.299	0.158	1.42055e-34	EC3	Plekhg1
Aurkaip1	2.59403e-38	0.658023	0.624	0.753	8.41815e-34	EC3	Aurkaip1
Mcc1	8.23395e-37	0.37292	0.297	0.161	2.67208e-32	EC3	Mcc
Smoc2	2.58572e-36	4.09242	0.701	0.567	8.39118e-32	EC3	Smoc2
Klf7	3.43211e-36	1.55628	0.532	0.379	1.11379e-31	EC3	Klf7
Eid1	7.18454e-36	1.15008	0.877	0.782	2.33153e-31	EC3	Eid1
Hdac71	9.0783e-36	0.915476	0.359	0.211	2.94609e-31	EC3	Hdac7
Ascc31	1.03732e-35	0.926243	0.479	0.326	3.36633e-31	EC3	Ascc3
Dact11	1.03876e-35	0.390269	0.445	0.289	3.37098e-31	EC3	Dact1
Tox1	1.12282e-35	0.31616	0.35	0.201	3.64377e-31	EC3	Tox
Rab11fip21	2.94011e-35	1.12564	0.456	0.31	9.54124e-31	EC3	Rab11fip2
Dsel1	4.12279e-35	0.507341	0.437	0.285	1.33793e-30	EC3	Dsel
Ppp1r21	7.8751e-35	1.21102	0.778	0.648	2.55563e-30	EC3	Ppp1r2
Eif3j21	1.1193e-34	0.381667	0.304	0.17	3.63236e-30	EC3	Eif3j2
Snx91	2.34521e-34	0.317428	0.412	0.262	7.61068e-30	EC3	Snx9
Gcc2	2.74036e-34	0.576973	0.528	0.372	8.89302e-30	EC3	Gcc2
Ngf1	2.74701e-34	0.445119	0.297	0.169	8.9146e-30	EC3	Ngf
Kcnj81	1.48844e-33	3.72592	0.379	0.232	4.83029e-29	EC3	Kcnj8
Kif3a	1.57261e-33	0.576367	0.529	0.381	5.10344e-29	EC3	Kif3a
Ppp1r12a	1.72081e-33	0.66501	0.627	0.491	5.58438e-29	EC3	Ppp1r12a
Klhl24	5.10493e-33	0.275129	0.331	0.194	1.65665e-28	EC3	Klhl24
Zfp687	7.45281e-33	0.299824	0.264	0.143	2.41859e-28	EC3	Zfp687
Spats2l2	8.46671e-33	0.276445	0.819	0.715	2.74762e-28	EC3	Spats2l
Sh3bp51	2.06193e-32	0.281038	0.455	0.3	6.69137e-28	EC3	Sh3bp5
Fam129a1	3.36428e-32	0.386265	0.303	0.173	1.09177e-27	EC3	Fam129a
Rspo3	5.82005e-32	3.98495	0.555	0.383	1.88872e-27	EC3	Rspo3
Hsd17b111	5.94783e-32	0.28068	0.337	0.202	1.93019e-27	EC3	Hsd17b11
Vcan	6.99779e-32	1.71884	0.832	0.68	2.27092e-27	EC3	Vcan
Zcchc61	9.64139e-32	0.43736	0.455	0.306	3.12882e-27	EC3	Zcchc6
Cers61	9.66255e-32	0.435743	0.263	0.143	3.13569e-27	EC3	Cers6
Kdelc21	1.01951e-31	0.292933	0.655	0.515	3.3085e-27	EC3	Kdelc2
Tbx15	1.40191e-31	0.323263	0.296	0.169	4.54947e-27	EC3	Tbx15
Flnc1	3.17049e-31	0.964087	0.408	0.264	1.02889e-26	EC3	Flnc
Vat11	5.22123e-31	0.527016	0.774	0.637	1.69439e-26	EC3	Vat1
Bnip3	5.26887e-31	2.97764	0.426	0.29	1.70985e-26	EC3	Bnip3
Rcan2	8.36639e-31	0.531374	0.326	0.196	2.71506e-26	EC3	Rcan2
Prmt21	1.43165e-30	0.399914	0.5	0.354	4.64599e-26	EC3	Prmt2
Sdccag8	1.92503e-30	0.31229	0.27	0.152	6.24709e-26	EC3	Sdccag8
Svep11	2.18827e-30	0.564473	0.448	0.307	7.10137e-26	EC3	Svep1
Cggbp11	4.62583e-30	2.15951	0.716	0.591	1.50117e-25	EC3	Cggbp1
Fer1	6.93873e-30	0.354509	0.354	0.219	2.25176e-25	EC3	Fer
Cmtm31	9.87726e-30	0.5004	0.785	0.686	3.20537e-25	EC3	Cmtm3
Abca1	1.31123e-29	0.393803	0.27	0.152	4.25521e-25	EC3	Abca1
Fam208a1	2.39981e-29	0.46095	0.393	0.256	7.78787e-25	EC3	Fam208a
Papd41	2.51904e-29	0.402469	0.486	0.347	8.17478e-25	EC3	Papd4
Lpp1	1.70474e-28	0.709817	0.655	0.52	5.53222e-24	EC3	Lpp
Zfr	2.42516e-28	0.951104	0.698	0.566	7.87012e-24	EC3	Zfr
Pgm21	3.17532e-28	0.433555	0.451	0.315	1.03045e-23	EC3	Pgm2
Rab8b1	3.53763e-28	0.352269	0.257	0.145	1.14803e-23	EC3	Rab8b
Sepp11	3.59008e-28	1.99318	0.119	0.272	1.16505e-23	EC3	Sepp1
Sde21	4.81276e-28	0.752098	0.608	0.477	1.56184e-23	EC3	Sde2
Ier5	1.19329e-27	1.13092	0.521	0.387	3.87246e-23	EC3	Ier5
Slc1a51	1.42092e-27	0.395917	0.443	0.305	4.61119e-23	EC3	Slc1a5
Aida1	5.67598e-27	0.448646	0.606	0.474	1.84197e-22	EC3	Aida
Il3ra1	9.46645e-27	0.36302	0.259	0.149	3.07205e-22	EC3	Il3ra
2610301B20Rik	3.39235e-26	0.260208	0.313	0.194	1.10089e-21	EC3	2610301B20Rik
Hs6st22	5.80162e-26	0.59441	0.384	0.253	1.88274e-21	EC3	Hs6st2
Ddx3y1	8.29561e-26	0.656425	0.249	0.404	2.69209e-21	EC3	Ddx3y
Kdm7a1	9.93924e-26	0.309264	0.321	0.2	3.22548e-21	EC3	Kdm7a
Rap2a	1.86916e-25	0.353649	0.303	0.188	6.0658e-21	EC3	Rap2a
Dennd2a1	1.93853e-25	0.266976	0.27	0.161	6.2909e-21	EC3	Dennd2a
Zmiz11	4.40537e-25	0.595603	0.505	0.372	1.42963e-20	EC3	Zmiz1
Tnks1bp11	5.04128e-25	0.257827	0.301	0.185	1.636e-20	EC3	Tnks1bp1
Zfp503	6.6233e-25	0.529707	0.417	0.284	2.14939e-20	EC3	Zfp503
Arpc1a	6.67894e-25	4.68859	0.879	0.791	2.16745e-20	EC3	Arpc1a
Aldh2	8.93928e-25	1.65215	0.846	0.747	2.90097e-20	EC3	Aldh2
Man2a11	9.38316e-25	0.719526	0.478	0.346	3.04502e-20	EC3	Man2a1
Rlf	9.72497e-25	0.27197	0.339	0.218	3.15595e-20	EC3	Rlf
Alkbh1	9.95176e-25	2.20375	0.319	0.455	3.22954e-20	EC3	Alkbh1
Ap2a22	9.95532e-25	1.91189	0.833	0.736	3.2307e-20	EC3	Ap2a2
Tgfbr31	1.08188e-24	0.301509	0.36	0.234	3.51092e-20	EC3	Tgfbr3
Dlc11	2.04264e-24	0.62467	0.56	0.436	6.62877e-20	EC3	Dlc1
Ptp4a12	2.14504e-24	0.512252	0.794	0.704	6.96109e-20	EC3	Ptp4a1
Smarca2	2.30526e-24	0.768692	0.842	0.754	7.48104e-20	EC3	Smarca2
Sema3a	2.73864e-24	1.07228	0.369	0.253	8.88743e-20	EC3	Sema3a
Mrgprf1	4.96605e-24	0.303771	0.436	0.308	1.61158e-19	EC3	Mrgprf
Slc38a41	5.3401e-24	0.295256	0.613	0.494	1.73297e-19	EC3	Slc38a4
Pja21	8.01771e-24	0.983135	0.662	0.543	2.60191e-19	EC3	Pja2
Hif1a1	1.55632e-23	0.925892	0.594	0.475	5.05057e-19	EC3	Hif1a
Ehbp11	2.15603e-23	0.388981	0.29	0.18	6.99676e-19	EC3	Ehbp1
Cdip1	3.97341e-23	0.329529	0.426	0.302	1.28945e-18	EC3	Cdip1
Pycr2	4.39301e-23	11.4272	0.336	0.461	1.42562e-18	EC3	Pycr2
Map1lc3a1	4.72186e-23	1.24895	0.918	0.894	1.53234e-18	EC3	Map1lc3a
Hook31	5.01842e-23	0.424118	0.596	0.475	1.62858e-18	EC3	Hook3
Serinc3	7.15825e-23	1.93892	0.471	0.578	2.32299e-18	EC3	Serinc3
Slc31a21	9.25982e-23	0.344931	0.462	0.338	3.005e-18	EC3	Slc31a2
Rras	1.01541e-22	0.274346	0.473	0.345	3.29519e-18	EC3	Rras
Ranbp2	1.09174e-22	0.272104	0.367	0.25	3.54293e-18	EC3	Ranbp2
Wdr1	1.15735e-22	0.684986	0.468	0.569	3.75585e-18	EC3	Wdr1
Ccdc186	1.39941e-22	0.408595	0.521	0.396	4.54137e-18	EC3	Ccdc186
Uba52	1.46561e-22	3.30428	0.962	0.929	4.7562e-18	EC3	Uba52
Zfp36l21	1.48417e-22	0.859534	0.598	0.47	4.81642e-18	EC3	Zfp36l2
Dusp221	1.93568e-22	0.318386	0.305	0.196	6.28166e-18	EC3	Dusp22
Sumo2	2.08436e-22	0.642848	0.978	0.983	6.76416e-18	EC3	Sumo2
Arl13b	2.10166e-22	0.405321	0.363	0.246	6.8203e-18	EC3	Arl13b
Fam32a1	2.74209e-22	0.34353	0.694	0.583	8.89863e-18	EC3	Fam32a
Pink11	3.28428e-22	0.391038	0.477	0.35	1.06581e-17	EC3	Pink1
Nudcd2	3.79394e-22	5.03382	0.558	0.654	1.23121e-17	EC3	Nudcd2
Jund	3.80221e-22	8.74226	0.964	0.931	1.23389e-17	EC3	Jund
G2e3	4.56201e-22	3.96033	0.307	0.194	1.48046e-17	EC3	G2e3
Pabpc4l1	1.33238e-21	0.376795	0.295	0.19	4.32384e-17	EC3	Pabpc4l
Wdr60	1.536e-21	0.326043	0.358	0.244	4.98464e-17	EC3	Wdr60
Upf2	2.0412e-21	0.364162	0.563	0.449	6.62411e-17	EC3	Upf2
Ttc28	2.59552e-21	1.02557	0.615	0.504	8.42299e-17	EC3	Ttc28
Crem	3.91468e-21	0.490852	0.321	0.213	1.27039e-16	EC3	Crem
Dnm1l1	4.61141e-21	0.348477	0.528	0.413	1.49649e-16	EC3	Dnm1l
Zfp449	8.24871e-21	0.294391	0.271	0.171	2.67687e-16	EC3	Zfp449
Nck11	1.904e-20	0.505393	0.492	0.375	6.17886e-16	EC3	Nck1
Fndc3b1	3.1949e-20	1.88809	0.711	0.603	1.03681e-15	EC3	Fndc3b
Numbl1	4.05824e-20	0.359461	0.538	0.421	1.31698e-15	EC3	Numbl
Abl11	5.52612e-20	0.297291	0.387	0.278	1.79334e-15	EC3	Abl1
Ube2w1	8.15089e-20	0.460759	0.582	0.472	2.64513e-15	EC3	Ube2w
Sgce1	1.04649e-19	0.342579	0.7	0.592	3.39608e-15	EC3	Sgce
Tnks	1.16367e-19	0.283089	0.255	0.159	3.77636e-15	EC3	Tnks
Fam76a	1.81857e-19	0.336209	0.447	0.332	5.90163e-15	EC3	Fam76a
Ythdc1	2.24737e-19	1.99528	0.698	0.598	7.29316e-15	EC3	Ythdc1
Tmem243	2.57455e-19	0.327139	0.304	0.204	8.35494e-15	EC3	Tmem243
Khk	3.95193e-19	0.313791	0.315	0.209	1.28248e-14	EC3	Khk
Syap11	6.0091e-19	0.411803	0.459	0.35	1.95007e-14	EC3	Syap1
Olfm1	9.40636e-19	0.303526	0.315	0.214	3.05255e-14	EC3	Olfm1
Tns11	9.7971e-19	0.564502	0.512	0.395	3.17936e-14	EC3	Tns1
Atl2	2.87952e-18	0.274696	0.299	0.201	9.34462e-14	EC3	Atl2
Reck	5.36856e-18	3.03606	0.558	0.437	1.74221e-13	EC3	Reck
Pex3	5.47225e-18	0.440078	0.361	0.261	1.77586e-13	EC3	Pex3
Suco	1.35369e-17	0.359578	0.286	0.192	4.39301e-13	EC3	Suco
Mrpl43	2.79107e-17	0.433699	0.434	0.535	9.05757e-13	EC3	Mrpl43
Dram2	4.00647e-17	0.92252	0.416	0.316	1.30018e-12	EC3	Dram2
Jarid2	4.32137e-17	0.285397	0.257	0.167	1.40237e-12	EC3	Jarid2
Wasf21	4.95999e-17	0.294541	0.711	0.614	1.60961e-12	EC3	Wasf2
Isca1	5.68369e-17	0.299344	0.31	0.215	1.84447e-12	EC3	Isca1
Xpnpep11	8.10957e-17	0.304389	0.651	0.545	2.63172e-12	EC3	Xpnpep1
Cd302	9.56598e-17	0.255659	0.748	0.647	3.10435e-12	EC3	Cd302
Trip111	1.10962e-16	0.482107	0.512	0.41	3.60093e-12	EC3	Trip11
Arl5b1	1.42916e-16	0.277369	0.349	0.253	4.6379e-12	EC3	Arl5b
Pim3	2.45093e-16	0.595587	0.311	0.22	7.95377e-12	EC3	Pim3
Acan1	2.75776e-16	2.05051	0.244	0.341	8.94949e-12	EC3	Acan
Stam1	4.63535e-16	0.254385	0.278	0.188	1.50426e-11	EC3	Stam
Arid4b1	5.50936e-16	0.554382	0.619	0.518	1.7879e-11	EC3	Arid4b
Zfp266	9.51255e-16	0.304059	0.437	0.333	3.08701e-11	EC3	Zfp266
Fez21	1.02774e-15	0.317388	0.463	0.368	3.33522e-11	EC3	Fez2
Gabarapl1	1.15186e-15	0.881561	0.347	0.25	3.73803e-11	EC3	Gabarapl1
Yy1	1.25966e-15	0.332568	0.609	0.521	4.08783e-11	EC3	Yy1
Palm1	1.54514e-15	0.60905	0.41	0.311	5.01427e-11	EC3	Palm
Tbl1x	2.52597e-15	0.801476	0.653	0.564	8.19728e-11	EC3	Tbl1x
Blvrb1	2.53345e-15	0.451618	0.732	0.647	8.22154e-11	EC3	Blvrb
Vwa5a1	2.94246e-15	0.385438	0.31	0.219	9.54887e-11	EC3	Vwa5a
Il6st	3.96423e-15	0.264032	0.544	0.431	1.28647e-10	EC3	Il6st
Anpep1	5.10982e-15	0.298552	0.463	0.357	1.65824e-10	EC3	Anpep
Bag31	5.6605e-15	0.299004	0.39	0.293	1.83695e-10	EC3	Bag3
Mia	6.18535e-15	10.0274	0.587	0.447	2.00727e-10	EC3	Mia
Sgpp11	7.09473e-15	0.288085	0.32	0.229	2.30238e-10	EC3	Sgpp1
Rdx	9.1873e-15	1.35318	0.93	0.907	2.98146e-10	EC3	Rdx
Txlna1	1.62485e-14	0.293184	0.694	0.618	5.27295e-10	EC3	Txlna
Ncoa7	1.69916e-14	0.301266	0.302	0.215	5.51413e-10	EC3	Ncoa7
Ptpra1	2.09342e-14	0.599125	0.637	0.539	6.79356e-10	EC3	Ptpra
Mob3c	2.2198e-14	0.275917	0.328	0.237	7.20368e-10	EC3	Mob3c
Csf1	2.28976e-14	0.460354	0.302	0.211	7.43074e-10	EC3	Csf1
Stim22	2.49194e-14	0.252762	0.287	0.203	8.08683e-10	EC3	Stim2
Sfr1	3.05386e-14	3.19253	0.987	0.976	9.91037e-10	EC3	Sfr1
Lzts21	4.95283e-14	0.288385	0.61	0.518	1.60729e-09	EC3	Lzts2
Sec62	5.98125e-14	0.855101	0.988	0.969	1.94103e-09	EC3	Sec62
Pafah1b11	6.78453e-14	1.03579	0.858	0.799	2.20171e-09	EC3	Pafah1b1
Ccdc102a1	7.43661e-14	0.305943	0.542	0.44	2.41333e-09	EC3	Ccdc102a
Nucb21	8.88846e-14	1.20056	0.79	0.714	2.88448e-09	EC3	Nucb2
Mgat1	2.02694e-13	0.725385	0.562	0.478	6.57781e-09	EC3	Mgat1
Dync1i2	2.4485e-13	5.6493	0.809	0.746	7.94589e-09	EC3	Dync1i2
Ypel31	3.24226e-13	0.49315	0.774	0.672	1.05218e-08	EC3	Ypel3
Kdm5a	3.36058e-13	0.578329	0.536	0.445	1.09057e-08	EC3	Kdm5a
Ppp4c	3.61848e-13	0.932522	0.659	0.715	1.17427e-08	EC3	Ppp4c
Tmed51	3.74486e-13	0.417776	0.581	0.497	1.21528e-08	EC3	Tmed5
Nucb11	4.6033e-13	1.65402	0.886	0.839	1.49386e-08	EC3	Nucb1
Zc3h132	6.83302e-13	0.315492	0.579	0.485	2.21745e-08	EC3	Zc3h13
Rspry1	1.14244e-12	0.33072	0.439	0.353	3.70743e-08	EC3	Rspry1
Pafah1b3	1.45177e-12	0.792234	0.711	0.632	4.71129e-08	EC3	Pafah1b3
Klhl7	1.45399e-12	0.348949	0.331	0.25	4.71848e-08	EC3	Klhl7
Pnpla81	1.57847e-12	0.396961	0.489	0.403	5.12244e-08	EC3	Pnpla8
Htra21	1.95841e-12	0.581309	0.406	0.49	6.35544e-08	EC3	Htra2
Elf2	2.29906e-12	0.272079	0.576	0.491	7.46092e-08	EC3	Elf2
Nsa2	2.64021e-12	1.55498	0.901	0.875	8.56801e-08	EC3	Nsa2
Appbp21	3.78948e-12	0.45247	0.552	0.467	1.22976e-07	EC3	Appbp2
Psmb10	4.21065e-12	3.0177	0.339	0.254	1.36644e-07	EC3	Psmb10
Fmr1	4.42409e-12	0.414934	0.517	0.426	1.43571e-07	EC3	Fmr1
2020-03-07	5.19842e-12	0.396122	0.546	0.455	1.68699e-07	EC3	2020-03-07
Mat2a	7.5195e-12	3.33798	0.775	0.721	2.44023e-07	EC3	Mat2a
Clint1	8.38651e-12	0.362713	0.637	0.563	2.72159e-07	EC3	Clint1
Atf2	1.16872e-11	0.82945	0.368	0.283	3.79274e-07	EC3	Atf2
Add11	1.29002e-11	0.419668	0.606	0.525	4.18636e-07	EC3	Add1
Ganab	1.57093e-11	0.748207	0.371	0.453	5.098e-07	EC3	Ganab
S1pr21	1.57298e-11	0.41677	0.471	0.387	5.10464e-07	EC3	S1pr2
Brd8	1.69692e-11	0.341289	0.603	0.506	5.50686e-07	EC3	Brd8
Sh3kbp11	2.87233e-11	0.286699	0.363	0.284	9.32128e-07	EC3	Sh3kbp1
Rnf21	3.12042e-11	0.458891	0.553	0.47	1.01264e-06	EC3	Rnf2
Polr3d	4.84369e-11	0.606322	0.605	0.527	1.57188e-06	EC3	Polr3d
Tm2d11	5.66215e-11	1.24481	0.728	0.662	1.83748e-06	EC3	Tm2d1
Ifitm3	7.1236e-11	16.0544	0.903	0.866	2.31175e-06	EC3	Ifitm3
Senp7	1.0141e-10	0.32902	0.342	0.265	3.29097e-06	EC3	Senp7
Bdp1	1.02093e-10	0.262452	0.376	0.298	3.31311e-06	EC3	Bdp1
Chic2	1.23824e-10	0.308398	0.714	0.637	4.01834e-06	EC3	Chic2
Tkt1	1.63006e-10	0.807549	0.699	0.746	5.28987e-06	EC3	Tkt
Pum1	1.98382e-10	0.534033	0.587	0.51	6.43788e-06	EC3	Pum1
Tgoln1	2.11163e-10	0.343415	0.401	0.321	6.85268e-06	EC3	Tgoln1
Ice1	2.37251e-10	0.254787	0.286	0.213	7.69926e-06	EC3	Ice1
Tra2a	5.58783e-10	0.577273	0.78	0.725	1.81336e-05	EC3	Tra2a
Tsc22d4	8.81912e-10	0.304432	0.656	0.591	2.86198e-05	EC3	Tsc22d4
Hmcn1	9.43634e-10	1.0131	0.59	0.52	3.06228e-05	EC3	Hmcn1
Rock2	9.53051e-10	2.19104	0.527	0.448	3.09284e-05	EC3	Rock2
Cwc25	1.06793e-09	0.361333	0.363	0.291	3.46566e-05	EC3	Cwc25
Cdk12	1.13139e-09	0.438495	0.498	0.423	3.67159e-05	EC3	Cdk12
Dnm3os	1.18545e-09	0.955769	0.367	0.296	3.84703e-05	EC3	Dnm3os
Top2a	1.21012e-09	7.057	0.24	0.305	3.9271e-05	EC3	Top2a
Xrn1	3.18119e-09	0.289298	0.381	0.306	0.000103236	EC3	Xrn1
Ddit3	3.466e-09	0.261349	0.347	0.277	0.000112479	EC3	Ddit3
Tapbp1	4.41579e-09	0.25259	0.478	0.402	0.000143301	EC3	Tapbp
Acap2	4.90402e-09	0.283886	0.332	0.264	0.000159145	EC3	Acap2
Pcm1	4.9577e-09	0.61279	0.637	0.562	0.000160887	EC3	Pcm1
Tor1aip1	6.40409e-09	1.13364	0.54	0.483	0.000207825	EC3	Tor1aip1
Rnf144a1	6.4084e-09	0.256851	0.363	0.29	0.000207965	EC3	Rnf144a
Psme21	8.57274e-09	1.23558	0.756	0.702	0.000278203	EC3	Psme2
Arih1	1.01412e-08	0.260459	0.365	0.293	0.000329101	EC3	Arih1
Ankrd11	1.28026e-08	0.549874	0.641	0.684	0.000415469	EC3	Ankrd11
Cped1	3.47432e-08	0.324404	0.462	0.391	0.00112749	EC3	Cped1
Copb1	3.96205e-08	1.55844	0.814	0.764	0.00128576	EC3	Copb1
Bcl10	4.47022e-08	0.70779	0.532	0.482	0.00145068	EC3	Bcl10
Nop58	4.90101e-08	9.24847	0.736	0.68	0.00159048	EC3	Nop58
Ddx3x	5.26539e-08	1.74726	0.745	0.684	0.00170873	EC3	Ddx3x
Cask	6.60162e-08	0.329289	0.361	0.296	0.00214236	EC3	Cask
Elp5	8.99504e-08	0.62473	0.598	0.528	0.00291907	EC3	Elp5
Aff4	1.06552e-07	0.472002	0.505	0.445	0.00345783	EC3	Aff4
Gpc41	1.08068e-07	0.448451	0.299	0.37	0.00350703	EC3	Gpc4
Rcn2	1.14676e-07	0.612936	0.876	0.884	0.00372146	EC3	Rcn2
Rbfox2	1.34287e-07	0.477625	0.699	0.627	0.00435789	EC3	Rbfox2
Eny2	1.48566e-07	8.51658	0.897	0.906	0.00482126	EC3	Eny2
H2-T22	2.31951e-07	0.636603	0.212	0.278	0.00752727	EC3	H2-T22
Fosl21	2.6983e-07	1.5532	0.348	0.285	0.00875653	EC3	Fosl2
Tmpo	2.84855e-07	2.38366	0.51	0.55	0.00924413	EC3	Tmpo
Snhg6	4.79101e-07	2.08632	0.687	0.724	0.0155478	EC3	Snhg6
Carnmt1	5.56608e-07	1.05332	0.447	0.501	0.018063	EC3	Carnmt1
Rab22a1	6.22146e-07	0.273422	0.494	0.435	0.0201899	EC3	Rab22a
Ctnnbip1	7.35792e-07	1.05238	0.484	0.542	0.0238779	EC3	Ctnnbip1
Rnf20	9.07486e-07	0.28672	0.424	0.366	0.0294497	EC3	Rnf20
Fam204a	1.31073e-06	0.397365	0.501	0.441	0.0425359	EC3	Fam204a
Gstm21	2.35494e-06	0.718037	0.492	0.428	0.0764227	EC3	Gstm2
Nsrp1	2.51581e-06	0.865982	0.574	0.52	0.0816431	EC3	Nsrp1
Armcx1	2.72393e-06	0.340166	0.48	0.423	0.088397	EC3	Armcx1
Trim35	2.7573e-06	0.482349	0.586	0.534	0.0894799	EC3	Trim35
Airn	5.67705e-06	0.299197	0.318	0.264	0.184232	EC3	Airn
0610012G03Rik	8.15909e-06	1.26583	0.812	0.834	0.264779	EC3	0610012G03Rik
Tpr	8.53423e-06	0.536041	0.848	0.812	0.276953	EC3	Tpr
Prdx4	1.03593e-05	1.15588	0.941	0.914	0.336179	EC3	Prdx4
Adprh1	1.07532e-05	0.660874	0.677	0.631	0.348964	EC3	Adprh
Ankrd12	1.11599e-05	0.27294	0.426	0.373	0.36216	EC3	Ankrd12
Nr3c1	1.2427e-05	0.333492	0.505	0.455	0.403282	EC3	Nr3c1
Pabpc4	1.47963e-05	0.519033	0.471	0.515	0.48017	EC3	Pabpc4
Ubald2	1.55176e-05	1.06376	0.393	0.444	0.503577	EC3	Ubald2
Ndel11	1.62482e-05	0.49842	0.689	0.633	0.527286	EC3	Ndel1
Pnp	1.90753e-05	0.414469	0.445	0.392	0.619032	EC3	Pnp
Eci2	2.35192e-05	0.396591	0.716	0.664	0.763244	EC3	Eci2
Fcer1g	2.5711e-05	4.46093	0.204	0.254	0.834374	EC3	Fcer1g
Hnrnpa0	2.77322e-05	1.5585	0.48	0.529	0.899967	EC3	Hnrnpa0
Cnot21	2.99865e-05	0.45125	0.489	0.438	0.973123	EC3	Cnot2
Vamp7	3.73405e-05	0.276668	0.471	0.42	1	EC3	Vamp7
Agfg11	3.79722e-05	0.286404	0.334	0.287	1	EC3	Agfg1
Tpp2	4.73046e-05	0.299573	0.393	0.338	1	EC3	Tpp2
Srrt	7.3333e-05	0.286344	0.426	0.468	1	EC3	Srrt
Pacsin21	7.3629e-05	0.381534	0.353	0.304	1	EC3	Pacsin2
Trip12	8.20651e-05	0.576838	0.461	0.417	1	EC3	Trip12
Gamt1	0.000131267	0.322074	0.513	0.462	1	EC3	Gamt
Col27a1	0.000146445	1.74904	0.489	0.429	1	EC3	Col27a1
Txnrd1	0.000161693	0.308149	0.394	0.343	1	EC3	Txnrd1
Chd2	0.000175111	0.410974	0.406	0.368	1	EC3	Chd2
Abi1	0.000233097	0.762561	0.378	0.336	1	EC3	Abi1
Slc22a17	0.000251202	0.447995	0.357	0.31	1	EC3	Slc22a17
Yipf3	0.000388285	0.570649	0.71	0.728	1	EC3	Yipf3
Tor1aip2	0.000442819	0.257132	0.488	0.448	1	EC3	Tor1aip2
Phf14	0.000506517	0.33034	0.529	0.485	1	EC3	Phf14
Chmp31	0.000532926	0.560323	0.619	0.579	1	EC3	Chmp3
Hmgcr1	0.000555504	1.09029	0.285	0.244	1	EC3	Hmgcr
Ube2l6	0.000693617	0.631555	0.294	0.254	1	EC3	Ube2l6
Msl3	0.000747738	0.280897	0.428	0.383	1	EC3	Msl3
Strn31	0.00090474	0.589758	0.635	0.587	1	EC3	Strn3
Epha3	0.00142667	0.352054	0.263	0.306	1	EC3	Epha3
Znhit6	0.00146767	0.259729	0.347	0.309	1	EC3	Znhit6
Zc3h15	0.00179778	0.820073	0.802	0.767	1	EC3	Zc3h15
Akap8l	0.00187848	0.315919	0.363	0.323	1	EC3	Akap8l
Smc5	0.00196339	0.691703	0.343	0.303	1	EC3	Smc5
N4bp2	0.00207211	0.412909	0.344	0.306	1	EC3	N4bp2
Zfand3	0.00226793	0.677775	0.397	0.353	1	EC3	Zfand3
Smad1	0.00251149	0.590153	0.404	0.365	1	EC3	Smad1
Psip1	0.00290733	0.89648	0.661	0.668	1	EC3	Psip1
Ash1l	0.00320207	0.70116	0.607	0.569	1	EC3	Ash1l
Zc3h18	0.00362725	0.496657	0.307	0.272	1	EC3	Zc3h18
Sp3	0.00423144	0.345892	0.416	0.38	1	EC3	Sp3
Mrps30	0.00583418	1.47724	0.369	0.335	1	EC3	Mrps30
Psme1	0.00595695	0.68869	0.626	0.586	1	EC3	Psme1
Dnajb6	0.00772983	1.29954	0.764	0.743	1	EC3	Dnajb6
Igfbp3	0	106.604	0.936	0.452	0	EC4	Igfbp3
Cxcl14	0	63.6031	0.967	0.561	0	EC4	Cxcl14
Col8a1	0	45.6006	0.981	0.576	0	EC4	Col8a1
C1qtnf3	0	38.6017	0.945	0.398	0	EC4	C1qtnf3
Gas6	0	8.57742	0.864	0.341	0	EC4	Gas6
Meox2	1.05826e-252	5.93815	0.783	0.272	3.43425e-248	EC4	Meox2
Fgf9	3.28807e-251	1.6973	0.293	0.032	1.06704e-246	EC4	Fgf9
Crabp2	4.68855e-236	3.9692	0.806	0.332	1.52153e-231	EC4	Crabp2
Fbln2	1.7187e-227	2.14854	0.987	0.729	5.57751e-223	EC4	Fbln2
Aspn	6.69984e-165	1.37089	1	0.905	2.17423e-160	EC4	Aspn
Cygb1	2.10645e-156	3.22317	0.664	0.288	6.83584e-152	EC4	Cygb
Sfrp2	9.1376e-156	Inf	0.99	0.912	2.96533e-151	EC4	Sfrp2
Igfbp4	1.0625e-149	4.60304	1	0.951	3.44804e-145	EC4	Igfbp4
Ntf3	1.28206e-149	2.0384	0.34	0.074	4.16055e-145	EC4	Ntf3
Rhoj	1.04272e-147	4.89444	0.886	0.544	3.38385e-143	EC4	Rhoj
Adgrl2	6.07204e-120	3.94795	0.692	0.344	1.9705e-115	EC4	Adgrl2
Ahnak22	7.97886e-108	1.21875	0.791	0.427	2.5893e-103	EC4	Ahnak2
Mfap4	8.009e-107	15.5849	0.999	0.931	2.59908e-102	EC4	Mfap4
Arap11	5.22779e-102	1.96693	0.766	0.45	1.69652e-97	EC4	Arap1
Gpc3	9.20771e-100	3.60309	1	0.977	2.98808e-95	EC4	Gpc3
Fbn2	4.09742e-96	0.290013	0.974	0.744	1.3297e-91	EC4	Fbn2
Lox	2.93722e-86	13.54	0.981	0.877	9.53185e-82	EC4	Lox
Tnmd	6.10079e-86	22.4693	0.684	0.392	1.97983e-81	EC4	Tnmd
Tgfb3	6.50446e-82	3.52127	0.76	0.507	2.11083e-77	EC4	Tgfb3
Ltbp1	1.17616e-81	1.8662	0.569	0.294	3.81688e-77	EC4	Ltbp1
Eln	5.76153e-81	14.604	0.979	0.909	1.86973e-76	EC4	Eln
Rasl11b	4.22357e-80	2.43162	0.669	0.364	1.37063e-75	EC4	Rasl11b
Ramp31	1.9047e-78	1.0341	0.309	0.099	6.18112e-74	EC4	Ramp3
Wnt5a	3.41194e-78	1.54597	0.52	0.238	1.10724e-73	EC4	Wnt5a
Meis2	1.21799e-75	1.47521	0.629	0.35	3.95262e-71	EC4	Meis2
Nhs	4.82468e-74	1.15429	0.431	0.184	1.5657e-69	EC4	Nhs
Kifap3	5.39201e-74	1.06222	0.825	0.6	1.74981e-69	EC4	Kifap3
Ralgps2	1.1749e-71	3.01523	0.505	0.256	3.8128e-67	EC4	Ralgps2
Gatsl3	2.8984e-71	1.14243	0.486	0.231	9.40588e-67	EC4	Gatsl3
Tspan11	3.72691e-69	0.638926	0.683	0.404	1.20946e-64	EC4	Tspan11
Fbln5	8.03793e-67	5.95059	0.826	0.602	2.60847e-62	EC4	Fbln5
Mn1	2.47526e-63	0.872884	0.718	0.469	8.03273e-59	EC4	Mn1
Ctsc	2.54539e-63	1.72927	0.509	0.265	8.2603e-59	EC4	Ctsc
Plk2	3.27459e-60	1.0413	0.584	0.341	1.06267e-55	EC4	Plk2
Fgf18	6.54769e-60	2.00588	0.395	0.171	2.12486e-55	EC4	Fgf18
Hs3st3b1	1.49871e-59	1.1564	0.288	0.106	4.8636e-55	EC4	Hs3st3b1
Mkx	3.44331e-58	0.906525	0.472	0.233	1.11742e-53	EC4	Mkx
Hmcn11	5.82423e-58	3.42015	0.24	0.549	1.89008e-53	EC4	Hmcn1
Pik3r1	1.73812e-56	1.35016	0.685	0.461	5.64054e-52	EC4	Pik3r1
Fibin	5.79349e-56	26.603	0.808	0.653	1.8801e-51	EC4	Fibin
Lsamp	6.51484e-56	0.560573	0.3	0.116	2.1142e-51	EC4	Lsamp
Tulp1	6.4459e-54	0.694198	0.277	0.104	2.09182e-49	EC4	Tulp1
Kcne41	1.21099e-53	0.382116	0.458	0.233	3.92991e-49	EC4	Kcne4
Ly6h	1.5337e-53	1.77043	0.311	0.125	4.97717e-49	EC4	Ly6h
Mxra71	2.09175e-53	1.13863	0.631	0.402	6.78814e-49	EC4	Mxra7
Hpgd	1.81783e-52	4.25972	0.262	0.098	5.89921e-48	EC4	Hpgd
Megf6	4.2567e-52	1.27396	0.452	0.228	1.38138e-47	EC4	Megf6
Bicc11	8.74948e-51	0.675715	0.8	0.602	2.83938e-46	EC4	Bicc1
Rspo22	7.18284e-49	0.685591	0.28	0.109	2.33097e-44	EC4	Rspo2
Zfp5031	4.37772e-47	0.889508	0.504	0.284	1.42066e-42	EC4	Zfp503
Ypel32	3.68922e-45	1.027	0.833	0.672	1.19722e-40	EC4	Ypel3
Pgf	6.33687e-45	0.85831	0.313	0.138	2.05644e-40	EC4	Pgf
Kazn	4.17186e-43	0.493286	0.302	0.133	1.35385e-38	EC4	Kazn
Nfix	8.56212e-43	0.430339	0.899	0.796	2.77858e-38	EC4	Nfix
Pappa2	1.33076e-42	0.703881	0.255	0.102	4.31859e-38	EC4	Pappa2
Chrdl11	5.02447e-40	1.83093	0.371	0.197	1.63054e-35	EC4	Chrdl1
Prelp	3.71114e-39	2.29036	0.46	0.268	1.20434e-34	EC4	Prelp
Angptl11	4.04173e-39	2.28433	0.609	0.429	1.31162e-34	EC4	Angptl1
Ltbp2	8.06772e-39	0.502586	0.362	0.181	2.61814e-34	EC4	Ltbp2
Strbp	1.45589e-38	0.939238	0.489	0.294	4.72465e-34	EC4	Strbp
Wnt9a	1.60653e-38	3.59038	0.386	0.203	5.2135e-34	EC4	Wnt9a
6330403K07Rik1	5.97068e-37	1.54405	0.548	0.333	1.9376e-32	EC4	6330403K07Rik
Cdh3	3.58934e-36	0.583065	0.305	0.144	1.16481e-31	EC4	Cdh3
Adgrg6	5.43364e-36	0.352806	0.321	0.156	1.76333e-31	EC4	Adgrg6
Pde3a	1.51082e-35	1.37304	0.299	0.143	4.9029e-31	EC4	Pde3a
Tbxa2r1	6.31621e-35	0.749829	0.333	0.171	2.04974e-30	EC4	Tbxa2r
Hcfc1r1	1.27254e-33	3.42277	0.844	0.724	4.12964e-29	EC4	Hcfc1r1
Eif3e	3.16608e-33	0.868206	0.998	0.972	1.02746e-28	EC4	Eif3e
Gstt1	4.8577e-33	0.565544	0.462	0.276	1.57642e-28	EC4	Gstt1
Trabd2b	6.68708e-33	1.30537	0.387	0.221	2.17009e-28	EC4	Trabd2b
Cd471	8.70984e-32	3.09987	0.896	0.777	2.82652e-27	EC4	Cd47
Svil	1.27179e-31	0.9335	0.709	0.566	4.1272e-27	EC4	Svil
AW5519842	2.80254e-31	0.37692	0.675	0.462	9.09479e-27	EC4	AW551984
Cpxm2	2.63005e-30	0.71949	0.377	0.21	8.53505e-26	EC4	Cpxm2
Epha31	1.78209e-28	1.61405	0.462	0.289	5.78323e-24	EC4	Epha3
Lsp1	6.91671e-28	3.55363	0.458	0.302	2.24461e-23	EC4	Lsp1
Gng8	3.81564e-27	0.394186	0.292	0.154	1.23825e-22	EC4	Gng8
Nog	6.21068e-27	1.19218	0.253	0.125	2.01549e-22	EC4	Nog
Cavin3	1.79102e-26	7.84268	0.551	0.401	5.81221e-22	EC4	Cavin3
Zfp462	8.24614e-26	9.42171	0.428	0.268	2.67604e-21	EC4	Zfp462
Arhgdib	2.02582e-25	2.0816	0.827	0.712	6.57418e-21	EC4	Arhgdib
Hic12	2.64477e-25	0.426641	0.349	0.2	8.58281e-21	EC4	Hic1
mt-Cytb	2.73851e-25	4.60218	1	0.998	8.88702e-21	EC4	mt-Cytb
Tapbp2	2.92506e-25	0.731585	0.56	0.399	9.4924e-21	EC4	Tapbp
Asap1	3.22956e-25	1.97026	0.684	0.572	1.04806e-20	EC4	Asap1
Gm26523	1.3522e-24	0.535616	0.387	0.242	4.38817e-20	EC4	Gm26523
Gli1	1.5536e-24	0.426975	0.287	0.155	5.04173e-20	EC4	Gli1
Cdon	2.66022e-24	0.305881	0.414	0.257	8.63295e-20	EC4	Cdon
1700025G04Rik	6.24938e-24	1.89204	0.653	0.508	2.02805e-19	EC4	1700025G04Rik
Vwa5a2	6.26074e-24	0.413102	0.362	0.219	2.03174e-19	EC4	Vwa5a
Slit3	9.70845e-24	0.328874	0.344	0.202	3.15059e-19	EC4	Slit3
Foxn3	1.0486e-23	0.970167	0.602	0.44	3.40291e-19	EC4	Foxn3
Hebp21	1.68275e-23	0.593781	0.485	0.325	5.46087e-19	EC4	Hebp2
Ghr1	2.53356e-22	0.646189	0.551	0.387	8.2219e-18	EC4	Ghr
Cers4	4.21867e-22	0.416465	0.267	0.147	1.36904e-17	EC4	Cers4
Itsn1	6.83797e-22	0.289839	0.362	0.221	2.21906e-17	EC4	Itsn1
Hs3st3a1	7.91678e-22	0.384643	0.254	0.136	2.56915e-17	EC4	Hs3st3a1
Pxdn1	5.5894e-21	2.15022	0.542	0.396	1.81387e-16	EC4	Pxdn
Zbtb8a	6.92821e-21	0.316744	0.273	0.153	2.24834e-16	EC4	Zbtb8a
2700094K13Rik	9.53761e-21	7.64714	0.344	0.484	3.09514e-16	EC4	2700094K13Rik
Glis2	1.03734e-20	0.732273	0.404	0.269	3.36637e-16	EC4	Glis2
Zfhx4	3.39174e-20	5.00979	0.776	0.661	1.10069e-15	EC4	Zfhx4
Irf2bpl	6.87831e-20	0.485572	0.545	0.397	2.23215e-15	EC4	Irf2bpl
mt-Nd4	9.45004e-20	4.28793	1	0.997	3.06673e-15	EC4	mt-Nd4
Atg4a	1.24683e-19	0.257182	0.297	0.175	4.0462e-15	EC4	Atg4a
Ptgfrn	3.14664e-19	0.261321	0.462	0.316	1.02115e-14	EC4	Ptgfrn
Fxyd6	1.11318e-18	1.51964	0.459	0.334	3.61249e-14	EC4	Fxyd6
Svep12	1.76674e-18	0.657042	0.453	0.313	5.73344e-14	EC4	Svep1
Creb3l2	2.26206e-18	0.402449	0.533	0.387	7.34083e-14	EC4	Creb3l2
Pard3b	4.09957e-18	0.551222	0.373	0.244	1.33039e-13	EC4	Pard3b
Lrig3	1.02884e-17	0.265021	0.399	0.27	3.3388e-13	EC4	Lrig3
Paxx2	1.23789e-17	0.287905	0.275	0.162	4.01719e-13	EC4	Paxx
Hsd17b112	1.29387e-17	0.305638	0.334	0.209	4.19886e-13	EC4	Hsd17b11
Txnip	1.48088e-17	0.265724	0.621	0.496	4.80575e-13	EC4	Txnip
Golga7	1.61013e-17	1.28141	0.707	0.609	5.22519e-13	EC4	Golga7
Tns3	4.24126e-17	1.11298	0.524	0.386	1.37637e-12	EC4	Tns3
Uchl1	1.97433e-16	0.636191	0.362	0.242	6.40709e-12	EC4	Uchl1
Foxp2	2.92547e-16	0.780108	0.718	0.585	9.49374e-12	EC4	Foxp2
Hdgfl32	1.10662e-15	0.425232	0.292	0.18	3.59121e-11	EC4	Hdgfl3
Arpc2	1.60348e-15	0.497191	0.925	0.93	5.2036e-11	EC4	Arpc2
Sigmar1	1.7983e-15	1.02001	0.722	0.625	5.83585e-11	EC4	Sigmar1
Cavin11	1.7991e-15	2.26936	0.47	0.333	5.83845e-11	EC4	Cavin1
Milr11	2.49077e-15	0.744552	0.251	0.153	8.08306e-11	EC4	Milr1
Lama21	3.53939e-15	0.425409	0.358	0.242	1.1486e-10	EC4	Lama2
Slit21	4.02663e-15	0.506787	0.325	0.216	1.30672e-10	EC4	Slit2
Sfxn31	5.74671e-15	0.700773	0.528	0.402	1.86492e-10	EC4	Sfxn3
Rsrp1	1.27717e-14	4.11367	0.968	0.924	4.14467e-10	EC4	Rsrp1
Tprgl	4.64142e-14	2.46496	0.733	0.64	1.50623e-09	EC4	Tprgl
Prickle1	5.62972e-14	0.272736	0.257	0.162	1.82696e-09	EC4	Prickle1
Stat3	5.76364e-14	0.605786	0.549	0.438	1.87042e-09	EC4	Stat3
Chpf	8.46771e-14	1.34377	0.782	0.68	2.74794e-09	EC4	Chpf
Arxes2	1.58855e-13	1.26469	0.426	0.312	5.15517e-09	EC4	Arxes2
Pcdh18	1.69997e-13	0.292797	0.392	0.274	5.51673e-09	EC4	Pcdh18
Cacnb3	2.48962e-13	0.440556	0.281	0.183	8.07931e-09	EC4	Cacnb3
Fzd1	3.66868e-13	0.68773	0.434	0.32	1.19056e-08	EC4	Fzd1
Tspan6	4.39368e-13	2.92214	0.774	0.662	1.42584e-08	EC4	Tspan6
Akap13	5.12051e-13	0.692988	0.61	0.503	1.66171e-08	EC4	Akap13
Arhgap28	6.37611e-13	0.578272	0.361	0.253	2.06917e-08	EC4	Arhgap28
Hn1	1.21052e-12	7.50568	0.31	0.435	3.92838e-08	EC4	Hn1
Sestd1	1.63626e-12	0.260449	0.262	0.169	5.30998e-08	EC4	Sestd1
Slirp	1.88478e-12	0.613042	0.789	0.841	6.11649e-08	EC4	Slirp
AY036118	1.90545e-12	0.297921	0.329	0.445	6.18357e-08	EC4	AY036118
Sec11a	2.01469e-12	2.28186	0.862	0.899	6.53809e-08	EC4	Sec11a
Rai14	2.37819e-12	0.52843	0.518	0.418	7.71771e-08	EC4	Rai14
Peak1	2.76286e-12	0.292289	0.366	0.262	8.96602e-08	EC4	Peak1
Thra1	5.50381e-12	0.394129	0.832	0.756	1.78609e-07	EC4	Thra
Ebna1bp2	5.72527e-12	1.36439	0.492	0.592	1.85796e-07	EC4	Ebna1bp2
Ube2k	5.95245e-12	0.62726	0.665	0.742	1.93169e-07	EC4	Ube2k
Il6st1	1.478e-11	0.564198	0.545	0.437	4.79639e-07	EC4	Il6st
Cgnl1	2.0531e-11	0.638072	0.372	0.273	6.66272e-07	EC4	Cgnl1
Ednra	5.91439e-11	1.05691	0.384	0.287	1.91934e-06	EC4	Ednra
Utp11l	9.81817e-11	0.439449	0.259	0.371	3.18619e-06	EC4	Utp11l
Nbeal1	1.70347e-10	0.328477	0.427	0.329	5.52811e-06	EC4	Nbeal1
Chmp2b	1.99935e-10	2.59152	0.679	0.571	6.4883e-06	EC4	Chmp2b
Rheb	2.59755e-10	0.46706	0.791	0.845	8.42958e-06	EC4	Rheb
Tipin	2.69497e-10	0.335577	0.504	0.594	8.74573e-06	EC4	Tipin
Tusc3	3.16036e-10	0.843917	0.564	0.643	1.0256e-05	EC4	Tusc3
Ubl4a	4.5136e-10	0.659433	0.497	0.591	1.46475e-05	EC4	Ubl4a
Nudt19	4.69774e-10	1.19593	0.253	0.354	1.52451e-05	EC4	Nudt19
Rtraf1	6.31844e-10	3.91671	0.529	0.405	2.05046e-05	EC4	Rtraf
Ccdc102a2	9.62815e-10	0.349907	0.541	0.445	3.12453e-05	EC4	Ccdc102a
Ntn12	1.12946e-09	0.361937	0.318	0.222	3.66534e-05	EC4	Ntn1
Adam33	1.23668e-09	0.352843	0.662	0.582	4.01326e-05	EC4	Adam33
Snx181	1.31655e-09	0.437171	0.465	0.368	4.27248e-05	EC4	Snx18
Arhgap5	1.34387e-09	0.613734	0.659	0.584	4.36113e-05	EC4	Arhgap5
Pold4	1.64381e-09	0.594418	0.583	0.487	5.3345e-05	EC4	Pold4
Pcmtd1	1.76524e-09	0.684465	0.427	0.339	5.72855e-05	EC4	Pcmtd1
Rspo31	2.11731e-09	0.619395	0.489	0.396	6.87111e-05	EC4	Rspo3
Fbxl71	2.3338e-09	0.418406	0.269	0.183	7.57366e-05	EC4	Fbxl7
Zmiz12	3.35526e-09	0.330606	0.474	0.381	0.000108885	EC4	Zmiz1
Ankrd10	3.37982e-09	0.378093	0.479	0.377	0.000109682	EC4	Ankrd10
Ephb2	3.65033e-09	0.415392	0.362	0.275	0.00011846	EC4	Ephb2
Ephb3	5.20241e-09	0.417607	0.344	0.26	0.000168828	EC4	Ephb3
Rab30	6.44517e-09	0.296614	0.329	0.244	0.000209159	EC4	Rab30
Zfp521	7.8415e-09	1.56018	0.387	0.293	0.000254472	EC4	Zfp521
Usp46	1.11981e-08	0.297546	0.31	0.23	0.000363401	EC4	Usp46
Gltscr2	1.13582e-08	0.785128	0.408	0.514	0.000368595	EC4	Gltscr2
Npepps	1.13783e-08	0.307895	0.53	0.443	0.000369249	EC4	Npepps
Agfg12	1.30094e-08	0.28743	0.379	0.286	0.000422181	EC4	Agfg1
Map2k2	1.99705e-08	1.24058	0.777	0.823	0.000648083	EC4	Map2k2
Epha4	2.54369e-08	5.2676	0.292	0.216	0.000825478	EC4	Epha4
Nsa21	3.911e-08	2.06556	0.905	0.876	0.0012692	EC4	Nsa2
Psme11	4.00949e-08	0.510198	0.658	0.585	0.00130116	EC4	Psme1
Nbdy1	5.49137e-08	0.580961	0.371	0.279	0.00178206	EC4	Nbdy
Homer2	5.55833e-08	0.267358	0.257	0.184	0.00180379	EC4	Homer2
Ppp3ca	5.68579e-08	0.998112	0.675	0.603	0.00184515	EC4	Ppp3ca
Agtr1a	6.20644e-08	0.268121	0.277	0.202	0.00201411	EC4	Agtr1a
Setbp1	9.88349e-08	0.261747	0.313	0.233	0.00320739	EC4	Setbp1
Hsd17b4	1.2221e-07	0.273377	0.354	0.277	0.00396597	EC4	Hsd17b4
Mier31	1.53087e-07	0.292762	0.281	0.206	0.00496798	EC4	Mier3
Pbx1	1.84779e-07	1.94344	0.657	0.58	0.00599645	EC4	Pbx1
Pdgfra	2.44205e-07	0.760087	0.579	0.513	0.00792494	EC4	Pdgfra
Vdac3	3.8911e-07	2.70443	0.796	0.829	0.0126274	EC4	Vdac3
Mapk3	4.02871e-07	0.424838	0.311	0.395	0.013074	EC4	Mapk3
Bend51	5.97273e-07	0.710094	0.396	0.32	0.0193827	EC4	Bend5
Rarg	6.65014e-07	0.260067	0.579	0.51	0.021581	EC4	Rarg
Flnb	9.05632e-07	0.749535	0.451	0.366	0.0293896	EC4	Flnb
Slc35f51	1.04949e-06	0.263591	0.551	0.481	0.034058	EC4	Slc35f5
Cbx61	1.2106e-06	0.281611	0.558	0.489	0.0392863	EC4	Cbx6
Ssb	1.31334e-06	2.03093	0.859	0.877	0.0426204	EC4	Ssb
Etl4	2.73375e-06	0.286241	0.263	0.196	0.0887157	EC4	Etl4
Fam114a11	2.99605e-06	0.37547	0.646	0.696	0.0972277	EC4	Fam114a1
Myh9	3.09747e-06	2.47136	0.2	0.273	0.100519	EC4	Myh9
Nxn	3.29142e-06	1.18681	0.503	0.435	0.106813	EC4	Nxn
Hook32	3.69309e-06	0.309699	0.557	0.483	0.119848	EC4	Hook3
Tcn21	3.73057e-06	0.435537	0.473	0.393	0.121064	EC4	Tcn2
M6pr	3.85626e-06	0.536229	0.323	0.4	0.125143	EC4	M6pr
Pam	3.92061e-06	4.57128	0.591	0.531	0.127231	EC4	Pam
mt-Nd1	6.49405e-06	69.6031	1	0.997	0.210745	EC4	mt-Nd1
Mtch1	8.53037e-06	3.71716	0.883	0.852	0.276828	EC4	Mtch1
Pdzrn3	1.04003e-05	0.256591	0.297	0.234	0.33751	EC4	Pdzrn3
Nrp2	1.09988e-05	14.5948	0.477	0.515	0.356934	EC4	Nrp2
Rab18	1.11941e-05	1.53411	0.894	0.861	0.363271	EC4	Rab18
Fam177a	1.20044e-05	0.561927	0.256	0.334	0.389567	EC4	Fam177a
Prkaca	1.20627e-05	0.367758	0.396	0.462	0.391459	EC4	Prkaca
Clmp	1.22522e-05	0.256467	0.805	0.74	0.397607	EC4	Clmp
Mcm2	1.25408e-05	0.86888	0.207	0.277	0.406975	EC4	Mcm2
Med28	1.56581e-05	0.677746	0.703	0.74	0.508138	EC4	Med28
Maf1	1.62636e-05	0.360265	0.542	0.479	0.527785	EC4	Maf1
Isoc1	1.68462e-05	0.480463	0.408	0.349	0.546694	EC4	Isoc1
Ifngr21	1.8422e-05	0.526267	0.614	0.554	0.597831	EC4	Ifngr2
Zfp207	4.86201e-05	1.89815	0.621	0.668	1	EC4	Zfp207
Pros1	5.00025e-05	0.264185	0.359	0.3	1	EC4	Pros1
Gcsh	5.35221e-05	0.637754	0.605	0.566	1	EC4	Gcsh
Psma5	5.79664e-05	0.9127	0.859	0.875	1	EC4	Psma5
Abcg21	5.96171e-05	0.344671	0.329	0.265	1	EC4	Abcg2
Dnajc8	6.2193e-05	0.308217	0.74	0.778	1	EC4	Dnajc8
Rab13	6.58554e-05	0.317477	0.571	0.508	1	EC4	Rab13
Sag	7.52998e-05	0.760241	0.281	0.222	1	EC4	Sag
Tgfbr1	0.000103898	0.364798	0.335	0.277	1	EC4	Tgfbr1
Top2b	0.000113239	0.26981	0.449	0.52	1	EC4	Top2b
Flot1	0.000126546	0.335507	0.42	0.358	1	EC4	Flot1
Usp9x	0.000129662	0.876722	0.517	0.459	1	EC4	Usp9x
Nr3c11	0.000142903	0.462041	0.504	0.458	1	EC4	Nr3c1
Ift46	0.000161073	0.263499	0.443	0.384	1	EC4	Ift46
Rbm4b	0.000161392	2.6105	0.721	0.671	1	EC4	Rbm4b
Unc50	0.000164271	0.339747	0.585	0.63	1	EC4	Unc50
Dapk3	0.000165542	0.294061	0.411	0.464	1	EC4	Dapk3
Vegfb	0.000172508	0.323767	0.317	0.263	1	EC4	Vegfb
Ssrp1	0.000200121	7.32526	0.675	0.706	1	EC4	Ssrp1
2020-03-21	0.000201501	0.256126	0.431	0.376	1	EC4	2020-03-02
Plscr31	0.000218134	0.254058	0.579	0.528	1	EC4	Plscr3
Sh3gl11	0.000333151	0.381525	0.617	0.656	1	EC4	Sh3gl1
Zfp354c	0.000421274	0.276606	0.355	0.304	1	EC4	Zfp354c
Lgmn	0.000450317	5.12082	0.549	0.486	1	EC4	Lgmn
Tnrc18	0.000558887	0.428555	0.348	0.296	1	EC4	Tnrc18
Ube2j2	0.00062252	0.420045	0.534	0.571	1	EC4	Ube2j2
Vcl	0.000683947	1.63169	0.287	0.349	1	EC4	Vcl
Hdac2	0.000736086	0.254007	0.738	0.748	1	EC4	Hdac2
Rab7	0.000904615	2.58442	0.745	0.758	1	EC4	Rab7
Ccnd1	0.00103294	1.57446	0.554	0.502	1	EC4	Ccnd1
Wasf22	0.00107351	0.313988	0.684	0.621	1	EC4	Wasf2
Wwtr1	0.00121094	0.267701	0.501	0.46	1	EC4	Wwtr1
B4galt11	0.00126324	0.298101	0.508	0.449	1	EC4	B4galt1
Abhd14a	0.0014267	1.33355	0.573	0.624	1	EC4	Abhd14a
Actn4	0.00157468	0.907556	0.558	0.604	1	EC4	Actn4
Kras1	0.00162011	0.565583	0.56	0.516	1	EC4	Kras
Ube2d3	0.00167328	0.474811	0.928	0.951	1	EC4	Ube2d3
Asf1a	0.0017602	0.595818	0.315	0.363	1	EC4	Asf1a
Stoml2	0.00188849	0.933258	0.579	0.621	1	EC4	Stoml2
Ndrg41	0.00216337	0.721154	0.241	0.283	1	EC4	Ndrg4
Gna11	0.00220594	0.323199	0.559	0.606	1	EC4	Gna11
Zranb2	0.00244065	0.540315	0.549	0.603	1	EC4	Zranb2
Smc6	0.00307779	5.54895	0.684	0.706	1	EC4	Smc6
Nap1l4	0.00314837	0.753267	0.615	0.658	1	EC4	Nap1l4
Ing4	0.0031799	0.252077	0.536	0.498	1	EC4	Ing4
Snx92	0.00325303	0.366918	0.315	0.276	1	EC4	Snx9
Slc30a5	0.00343745	10.2338	0.334	0.378	1	EC4	Slc30a5
Snx4	0.00367292	0.700083	0.619	0.574	1	EC4	Snx4
Cttn	0.00393803	0.390154	0.678	0.634	1	EC4	Cttn
Pycard2	0.0053168	0.417444	0.59	0.568	1	EC4	Pycard
Rlim	0.00595416	1.25087	0.341	0.389	1	EC4	Rlim
Fnta	0.00661162	1.22913	0.625	0.667	1	EC4	Fnta
Psap	0.00696813	1.35029	0.981	0.961	1	EC4	Psap
Tmem50a	0.00716141	0.812722	0.894	0.882	1	EC4	Tmem50a
Flot2	0.00756141	0.395416	0.355	0.316	1	EC4	Flot2
Eif1b	0.00785409	7.94719	0.679	0.733	1	EC4	Eif1b
Capzb	0.00814832	3.31749	0.876	0.882	1	EC4	Capzb
Sin3b	0.00837379	0.475229	0.713	0.737	1	EC4	Sin3b
Timm17b	0.00841589	0.287813	0.687	0.725	1	EC4	Timm17b
Tdp2	0.00967261	0.294914	0.399	0.361	1	EC4	Tdp2
Tac1	0	19.398	0.497	0.091	0	LIG	Tac1
Chodl	0	3.12988	0.63	0.084	0	LIG	Chodl
Gm267711	2.08177e-305	3.25116	0.805	0.317	6.75577e-301	LIG	Gm26771
Cpxm21	7.14384e-293	3.65295	0.613	0.18	2.31832e-288	LIG	Cpxm2
Prrx1	6.36096e-246	12.7307	0.995	0.924	2.06426e-241	LIG	Prrx1
Alcam	7.82534e-245	2.51984	0.898	0.578	2.53948e-240	LIG	Alcam
Adgrl21	5.70898e-215	0.721208	0.726	0.33	1.85268e-210	LIG	Adgrl2
Mkx1	2.21051e-205	1.49145	0.592	0.213	7.17356e-201	LIG	Mkx
Col8a2	4.55361e-168	6.1513	0.803	0.476	1.47774e-163	LIG	Col8a2
Gsc	7.73775e-150	1.08642	0.288	0.065	2.51105e-145	LIG	Gsc
Tcea3	3.4193e-143	0.605609	0.828	0.5	1.10963e-138	LIG	Tcea3
Ralgps21	1.04846e-142	1.4006	0.561	0.242	3.40245e-138	LIG	Ralgps2
Fbn21	2.82177e-140	4.55202	0.975	0.736	9.1572e-136	LIG	Fbn2
Fbln21	4.67962e-137	2.6912	0.956	0.724	1.51863e-132	LIG	Fbln2
Myl9	4.5005e-130	55.1111	0.851	0.592	1.4605e-125	LIG	Myl9
Thbs2	5.78825e-129	25.8197	0.921	0.77	1.8784e-124	LIG	Thbs2
Megf61	6.62001e-123	2.59687	0.503	0.216	2.14833e-118	LIG	Megf6
Pde3a1	4.22355e-120	0.637479	0.379	0.129	1.37063e-115	LIG	Pde3a
Cdh31	1.79448e-112	0.729354	0.377	0.131	5.82345e-108	LIG	Cdh3
Ptprd	1.00358e-107	0.634871	0.885	0.683	3.25683e-103	LIG	Ptprd
Zic1	4.87343e-104	4.83589	0.667	0.43	1.58152e-99	LIG	Zic1
Ltbp11	3.54468e-95	2.60561	0.561	0.286	1.15032e-90	LIG	Ltbp1
Adgrg61	3.5866e-94	1.086	0.374	0.146	1.16392e-89	LIG	Adgrg6
Trabd2b1	3.58758e-92	0.801341	0.462	0.208	1.16424e-87	LIG	Trabd2b
Foxp21	1.22741e-90	2.05234	0.816	0.571	3.98319e-86	LIG	Foxp2
Uchl11	2.48105e-90	1.23043	0.476	0.226	8.05149e-86	LIG	Uchl1
Lurap1l1	7.64748e-83	0.585244	0.542	0.27	2.48176e-78	LIG	Lurap1l
Il11ra1	3.98304e-80	14.6993	0.992	0.935	1.29257e-75	LIG	Il11ra1
Nhs1	4.53624e-76	0.687497	0.401	0.18	1.4721e-71	LIG	Nhs
Gm265231	5.83329e-75	1.8535	0.456	0.231	1.89302e-70	LIG	Gm26523
Zic4	4.02387e-74	0.549621	0.328	0.135	1.30583e-69	LIG	Zic4
Tox2	1.87915e-73	0.575225	0.418	0.197	6.0982e-69	LIG	Tox
Ogn	1.14249e-69	4.50692	0.972	0.827	3.70759e-65	LIG	Ogn
Bgn	1.16622e-68	24.9049	0.997	0.974	3.78463e-64	LIG	Bgn
Tpm1	4.29724e-68	68.2108	0.961	0.888	1.39454e-63	LIG	Tpm1
En1	3.58648e-62	2.49458	0.61	0.395	1.16388e-57	LIG	En1
Tgfb31	1.71805e-59	0.261168	0.712	0.505	5.57543e-55	LIG	Tgfb3
Kifap31	2.56402e-57	3.25427	0.759	0.601	8.32077e-53	LIG	Kifap3
Tagln	6.94847e-57	93.2362	0.511	0.319	2.25492e-52	LIG	Tagln
Ly6h1	4.38055e-56	0.412777	0.288	0.122	1.42158e-51	LIG	Ly6h
Cnn2	1.04928e-54	1.11422	0.899	0.794	3.40511e-50	LIG	Cnn2
Rasl11b1	1.26363e-52	2.08375	0.577	0.365	4.10072e-48	LIG	Rasl11b
Socs2	1.11475e-51	0.792646	0.304	0.142	3.61759e-47	LIG	Socs2
Nexn	4.69661e-51	0.639582	0.272	0.119	1.52414e-46	LIG	Nexn
Angptl12	9.77681e-50	1.31651	0.648	0.42	3.17277e-45	LIG	Angptl1
Strbp1	1.3498e-48	0.4451	0.485	0.288	4.38039e-44	LIG	Strbp
P4ha3	2.83031e-47	2.08542	0.776	0.609	9.18492e-43	LIG	P4ha3
Adgrl31	3.0997e-45	0.25601	0.346	0.177	1.00592e-40	LIG	Adgrl3
Arhgdib1	1.20919e-44	1.92358	0.814	0.71	3.92405e-40	LIG	Arhgdib
Bend52	2.94519e-42	0.678162	0.5	0.307	9.55772e-38	LIG	Bend5
AW5519843	4.33275e-42	0.833857	0.681	0.454	1.40607e-37	LIG	AW551984
Adam331	1.50273e-41	4.02407	0.705	0.575	4.87667e-37	LIG	Adam33
Gas2	3.80403e-40	0.751525	0.288	0.144	1.23448e-35	LIG	Gas2
Fam212a	6.92208e-40	0.834018	0.375	0.211	2.24635e-35	LIG	Fam212a
Nfix1	8.09993e-40	3.69187	0.89	0.793	2.62859e-35	LIG	Nfix
Ptn	1.51119e-38	27.238	0.998	0.977	4.90411e-34	LIG	Ptn
Sdc2	2.05686e-38	0.451753	0.809	0.696	6.67493e-34	LIG	Sdc2
Wnt111	1.42272e-37	0.343771	0.31	0.162	4.617e-33	LIG	Wnt11
Svep13	3.96199e-37	0.518152	0.48	0.306	1.28574e-32	LIG	Svep1
Nnmt1	4.58323e-37	0.280329	0.47	0.301	1.48735e-32	LIG	Nnmt
Zfp5211	9.47314e-37	0.379102	0.453	0.283	3.07422e-32	LIG	Zfp521
Marcksl1	1.60058e-36	4.52142	0.952	0.902	5.19421e-32	LIG	Marcksl1
Plk21	2.83622e-34	1.72979	0.508	0.341	9.20412e-30	LIG	Plk2
Fxyd61	4.99174e-34	0.848234	0.501	0.326	1.61992e-29	LIG	Fxyd6
Msx2	6.1517e-34	2.96993	0.448	0.295	1.99635e-29	LIG	Msx2
Zfp57	2.17424e-32	0.293127	0.26	0.134	7.05586e-28	LIG	Zfp57
Lipa	9.12718e-32	2.22797	0.482	0.322	2.96195e-27	LIG	Lipa
Tbc1d241	1.70469e-30	0.306015	0.406	0.259	5.53205e-26	LIG	Tbc1d24
Tapbp3	6.45054e-30	0.534803	0.554	0.395	2.09333e-25	LIG	Tapbp
Rai141	4.72522e-29	0.46001	0.561	0.41	1.53343e-24	LIG	Rai14
Cacna2d1	4.69183e-28	0.518099	0.339	0.204	1.52259e-23	LIG	Cacna2d1
Chd3	5.68076e-28	2.41911	0.899	0.833	1.84352e-23	LIG	Chd3
Clmp1	1.09409e-27	0.776892	0.84	0.734	3.55055e-23	LIG	Clmp
Thbs1	1.31802e-27	1.83174	0.735	0.572	4.27723e-23	LIG	Thbs1
Mdfic	3.39446e-27	0.520619	0.518	0.377	1.10157e-22	LIG	Mdfic
P3h3	5.79304e-27	3.91484	0.847	0.78	1.87996e-22	LIG	P3h3
Peak11	6.8838e-27	0.643825	0.394	0.256	2.23393e-22	LIG	Peak1
Hdgfrp3	7.60167e-27	0.382131	0.256	0.141	2.4669e-22	LIG	Hdgfrp3
Tenm3	1.38366e-26	2.51315	0.642	0.501	4.49025e-22	LIG	Tenm3
Cdk141	2.92972e-25	1.00428	0.449	0.309	9.50752e-21	LIG	Cdk14
Sema3a1	8.41733e-25	0.798028	0.387	0.253	2.73159e-20	LIG	Sema3a
Samd4	9.89266e-25	0.956003	0.52	0.381	3.21037e-20	LIG	Samd4
Homer21	3.04526e-24	0.399473	0.295	0.178	9.88247e-20	LIG	Homer2
Arhgef25	6.17962e-24	3.21386	0.764	0.661	2.00541e-19	LIG	Arhgef25
Meis21	6.92529e-24	1.18665	0.498	0.356	2.2474e-19	LIG	Meis2
Nr2f1	1.03357e-23	0.348937	0.298	0.181	3.35413e-19	LIG	Nr2f1
Tns31	1.54362e-23	0.611202	0.521	0.383	5.00935e-19	LIG	Tns3
Tubb4b	4.26268e-23	2.18572	0.523	0.634	1.38332e-18	LIG	Tubb4b
Cdc42bpa	1.13382e-22	1.20102	0.469	0.343	3.67947e-18	LIG	Cdc42bpa
Arhgap281	5.18666e-22	0.292896	0.372	0.249	1.68318e-17	LIG	Arhgap28
Siva1	1.24461e-21	1.69136	0.865	0.77	4.03901e-17	LIG	Siva1
Ifitm1	2.63843e-21	4.55261	0.171	0.295	8.56222e-17	LIG	Ifitm1
Ppp2cb	3.71553e-21	0.468526	0.287	0.177	1.20576e-16	LIG	Ppp2cb
Cuedc1	4.14068e-21	0.432435	0.446	0.319	1.34373e-16	LIG	Cuedc1
Mxra72	6.01122e-21	0.367335	0.541	0.405	1.95076e-16	LIG	Mxra7
Ccdc102a3	1.62767e-20	0.297859	0.571	0.439	5.2821e-16	LIG	Ccdc102a
Grb10	3.80833e-20	8.35132	0.97	0.938	1.23588e-15	LIG	Grb10
Nfia	5.49746e-20	13.1353	0.79	0.666	1.78403e-15	LIG	Nfia
Rab181	5.65235e-20	1.1183	0.895	0.86	1.8343e-15	LIG	Rab18
Ephb21	6.25864e-20	0.570348	0.391	0.27	2.03106e-15	LIG	Ephb2
Apbb2	1.16569e-19	3.34393	0.561	0.433	3.78291e-15	LIG	Apbb2
Gatsl31	1.38772e-19	0.376561	0.353	0.237	4.50343e-15	LIG	Gatsl3
Bicc12	2.47192e-19	1.27209	0.73	0.603	8.02188e-15	LIG	Bicc1
Sema6c	3.44854e-19	0.289849	0.268	0.166	1.11912e-14	LIG	Sema6c
Ctf1	3.93439e-19	0.447277	0.272	0.169	1.27679e-14	LIG	Ctf1
1810058I24Rik	9.77471e-19	2.25795	0.945	0.905	3.17209e-14	LIG	1810058I24Rik
Cdc42ep51	1.01776e-18	0.778928	0.714	0.624	3.30283e-14	LIG	Cdc42ep5
Dkk3	5.84487e-18	0.509253	0.804	0.716	1.89678e-13	LIG	Dkk3
Setbp11	1.25283e-17	0.326329	0.338	0.228	4.06569e-13	LIG	Setbp1
Fzd11	1.69265e-17	1.22827	0.427	0.317	5.49297e-13	LIG	Fzd1
Cdon1	4.69121e-17	0.481504	0.363	0.257	1.52239e-12	LIG	Cdon
Lrp1	6.14909e-17	3.97616	0.799	0.698	1.9955e-12	LIG	Lrp1
Parva	1.50889e-16	2.00838	0.602	0.502	4.89665e-12	LIG	Parva
Acta2	2.81898e-16	101.237	0.5	0.399	9.14816e-12	LIG	Acta2
Hacd42	2.85201e-16	0.282798	0.395	0.281	9.25533e-12	LIG	Hacd4
Tprgl1	8.93767e-16	0.924712	0.719	0.639	2.90045e-11	LIG	Tprgl
Ier3	9.18372e-16	10.228	0.343	0.443	2.9803e-11	LIG	Ier3
Eva1b	1.74475e-15	5.48811	0.878	0.848	5.66207e-11	LIG	Eva1b
Hsph1	1.9539e-15	0.597445	0.367	0.269	6.34079e-11	LIG	Hsph1
Rps11	4.04837e-15	10.9257	1	1	1.31378e-10	LIG	Rps11
Tnfaip8	4.46876e-15	0.425925	0.514	0.406	1.4502e-10	LIG	Tnfaip8
Wls2	4.63986e-15	1.98491	0.846	0.773	1.50573e-10	LIG	Wls
Ghr2	5.60077e-14	0.339782	0.492	0.388	1.81756e-09	LIG	Ghr
Ifitm2	7.41717e-14	1.18891	0.998	0.996	2.40702e-09	LIG	Ifitm2
Blcap	8.99836e-14	0.261424	0.363	0.268	2.92015e-09	LIG	Blcap
Rpl28	1.88277e-13	13.2208	0.999	0.999	6.10996e-09	LIG	Rpl28
Npdc1	1.91058e-13	1.09285	0.691	0.6	6.20021e-09	LIG	Npdc1
Ephb31	1.98025e-13	0.288147	0.352	0.256	6.4263e-09	LIG	Ephb3
Ptgfrn1	2.67386e-13	0.401647	0.412	0.317	8.67721e-09	LIG	Ptgfrn
Il6st2	4.14932e-13	0.310279	0.533	0.434	1.34654e-08	LIG	Il6st
Tead1	4.35371e-13	0.842675	0.405	0.311	1.41287e-08	LIG	Tead1
C1qtnf2	4.90238e-13	0.971723	0.608	0.549	1.59092e-08	LIG	C1qtnf2
Zfp354c1	6.24655e-13	0.313787	0.395	0.298	2.02713e-08	LIG	Zfp354c
Naca	6.79994e-13	7.65302	0.998	0.998	2.20672e-08	LIG	Naca
Rps27l	8.41937e-13	16.2344	0.975	0.973	2.73225e-08	LIG	Rps27l
Igf2r1	1.1352e-12	1.3831	0.583	0.666	3.68396e-08	LIG	Igf2r
Sertad4	1.33861e-12	0.5089	0.338	0.246	4.34407e-08	LIG	Sertad4
Twist1	1.37224e-12	1.85831	0.579	0.512	4.45318e-08	LIG	Twist1
Cxx1b	3.23885e-12	0.433113	0.311	0.225	1.05107e-07	LIG	Cxx1b
Eid11	5.65255e-12	0.629576	0.846	0.787	1.83437e-07	LIG	Eid1
Rpl9	9.90284e-12	2.239	1	1	3.21367e-07	LIG	Rpl9
Ifi27	2.708e-11	5.48628	0.735	0.67	8.78801e-07	LIG	Ifi27
Rps15	3.05898e-11	10.5346	1	0.999	9.92701e-07	LIG	Rps15
Sertad2	3.13792e-11	0.345426	0.477	0.39	1.01832e-06	LIG	Sertad2
Rpl10a	5.79795e-11	24.188	1	0.999	1.88155e-06	LIG	Rpl10a
Fzd2	5.81614e-11	0.602482	0.644	0.571	1.88745e-06	LIG	Fzd2
Rtn41	6.88333e-11	1.32286	0.869	0.837	2.23378e-06	LIG	Rtn4
Abhd14b	6.94253e-11	0.276786	0.281	0.202	2.25299e-06	LIG	Abhd14b
Ndufa5	7.44978e-11	1.58266	0.857	0.889	2.4176e-06	LIG	Ndufa5
Ddah2	8.22569e-11	0.417079	0.896	0.815	2.6694e-06	LIG	Ddah2
Ctxn1	1.04128e-10	0.349597	0.281	0.206	3.37916e-06	LIG	Ctxn1
Efnb3	1.1067e-10	0.257224	0.26	0.183	3.59145e-06	LIG	Efnb3
Tgfbr21	1.42803e-10	0.594949	0.491	0.402	4.63423e-06	LIG	Tgfbr2
Evl	1.75578e-10	0.305871	0.479	0.394	5.69785e-06	LIG	Evl
Ap1s1	1.98354e-10	1.80558	0.586	0.653	6.43699e-06	LIG	Ap1s1
Chpf1	2.45584e-10	0.366667	0.746	0.681	7.96971e-06	LIG	Chpf
Adamts10	1.28505e-09	0.403317	0.414	0.331	4.17023e-05	LIG	Adamts10
Itsn11	1.38154e-09	0.25348	0.295	0.224	4.48337e-05	LIG	Itsn1
Limch11	2.69693e-09	1.79877	0.282	0.207	8.75208e-05	LIG	Limch1
Isoc11	2.80348e-09	0.559154	0.424	0.345	9.09786e-05	LIG	Isoc1
Prkcdbp	3.08664e-09	7.3229	0.571	0.543	0.000100168	LIG	Prkcdbp
Mettl23	3.32083e-09	0.374395	0.59	0.524	0.000107767	LIG	Mettl23
Tmem234	4.13018e-09	1.86042	0.809	0.845	0.000134033	LIG	Tmem234
Asph	4.36374e-09	0.482301	0.605	0.528	0.000141612	LIG	Asph
[truncated: 12,214 more rows]
